# Supplementary material for: Decoding the complexity of on-target integration: characterizing DNA insertions at the CRISPR-Cas9 targeted locus using nanopore sequencing
Source: PubMed Central journal article supplement (PMC10874558; doi:10.1186/s12864-024-10050-6), 2024-02-17

# The Original Images of Electrophoretic Gels Showing Full-Length Membranes

The original image of Figure 2B

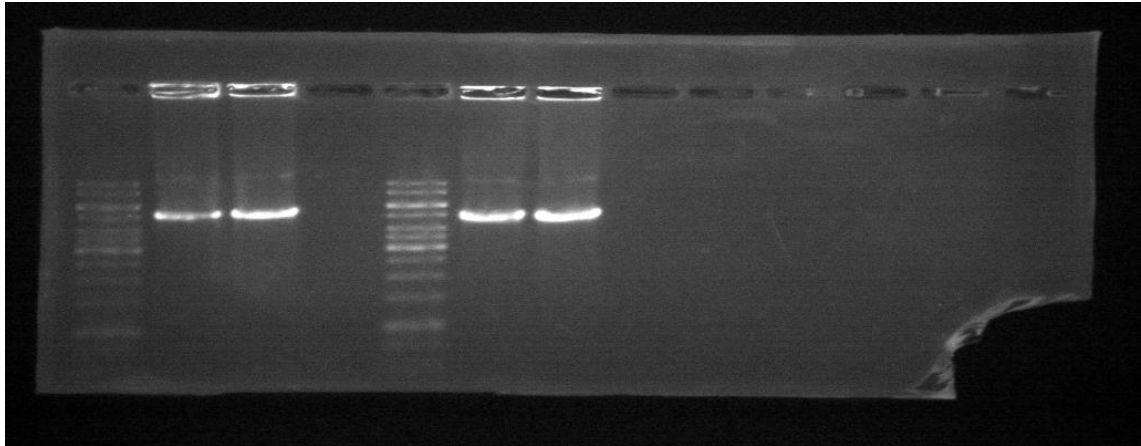

The following red-framed image is shown in Figure2B.

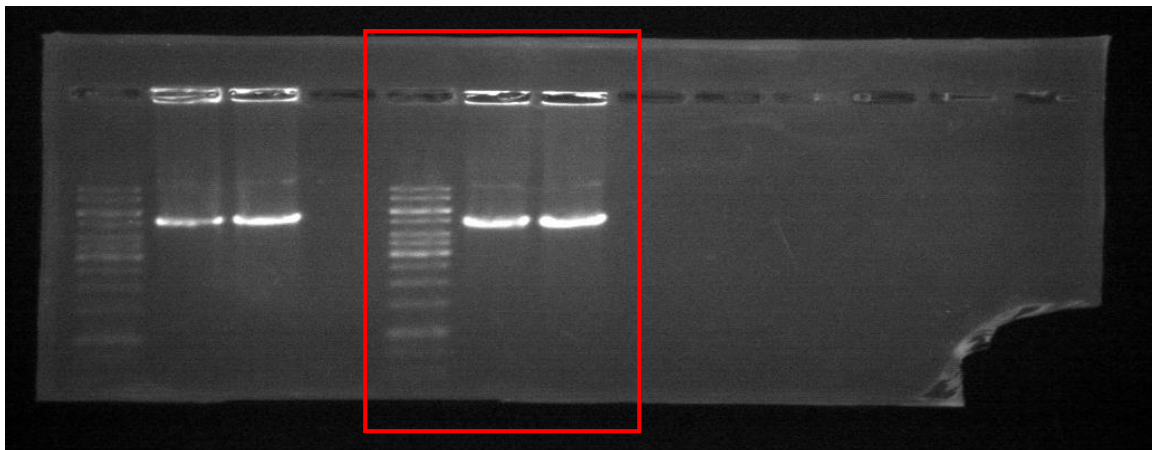

The original image of Figure 3E

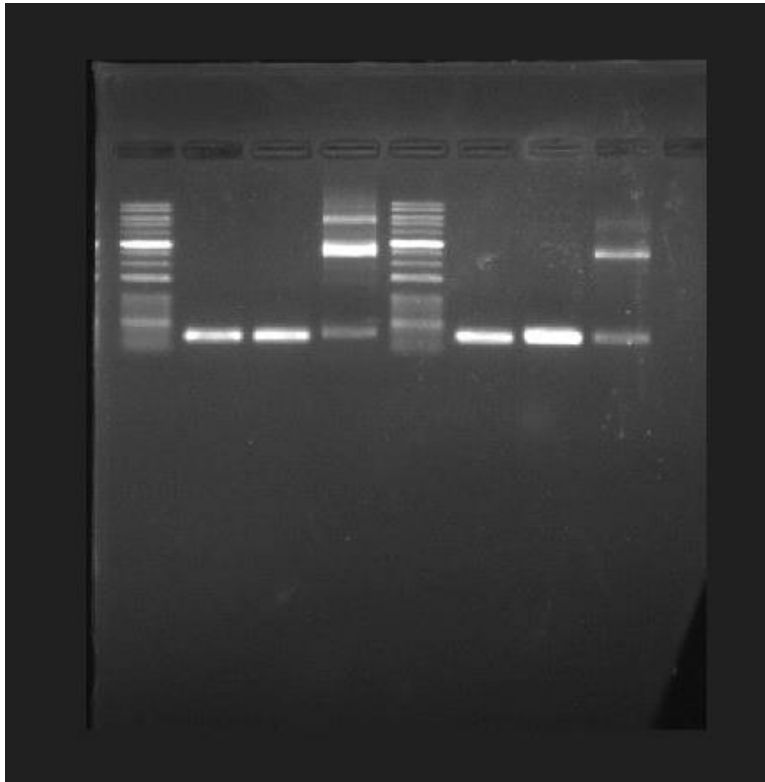

The following red-framed image is shown in Figure3E.

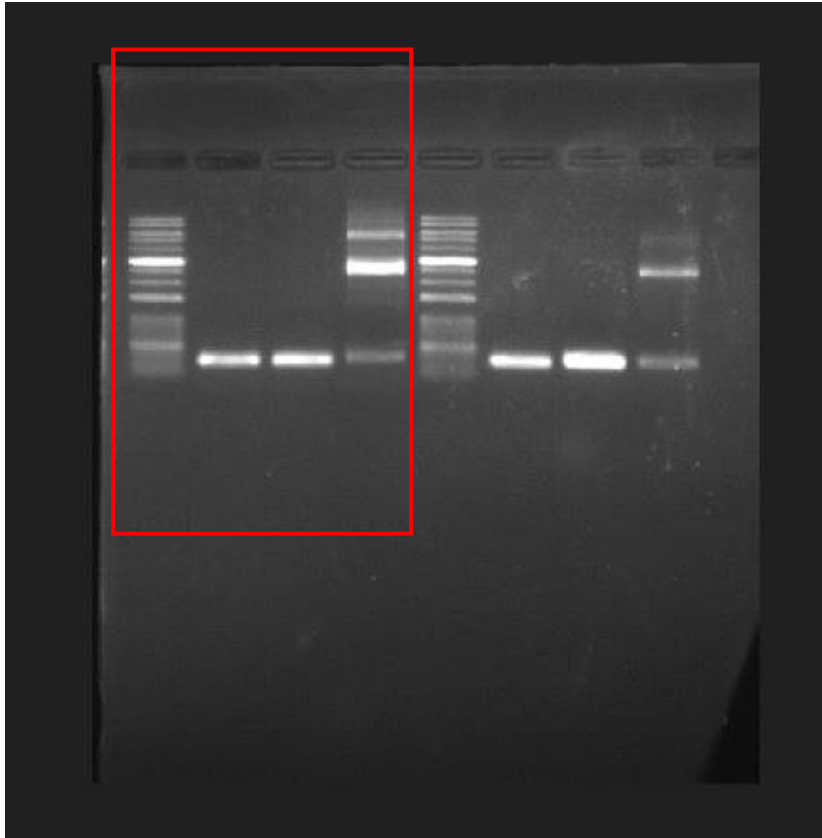

The original image of Figure 6B

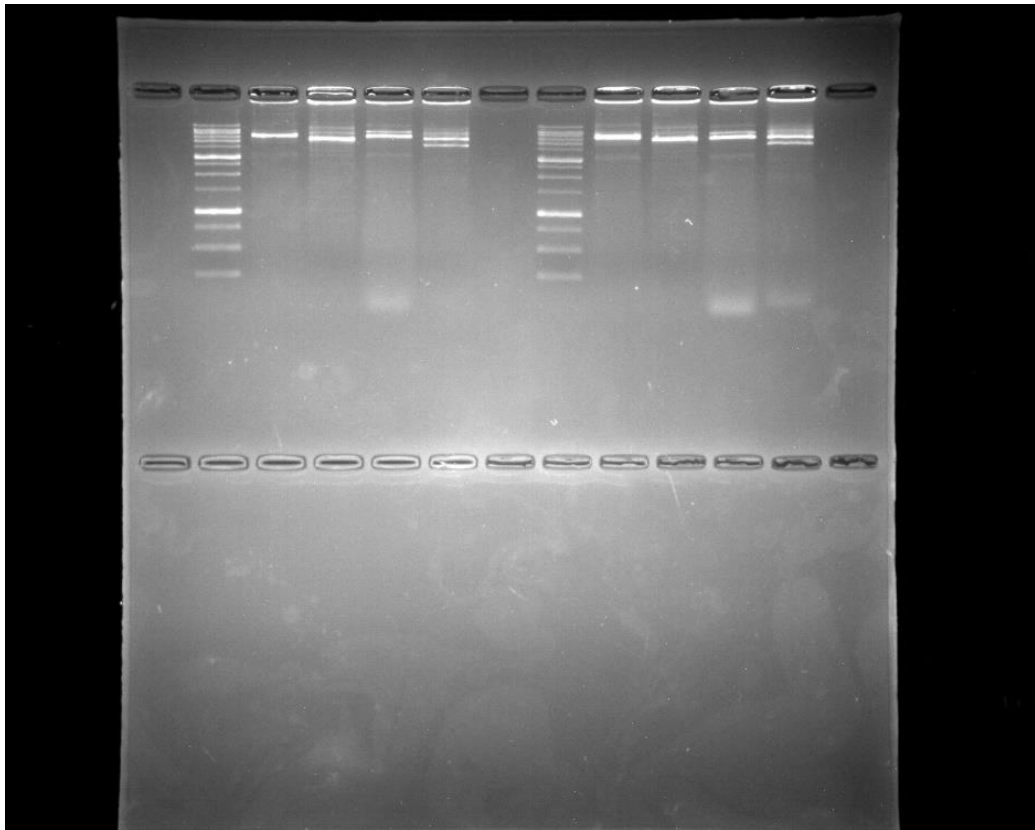

The following red-framed image is shown in Figure6B

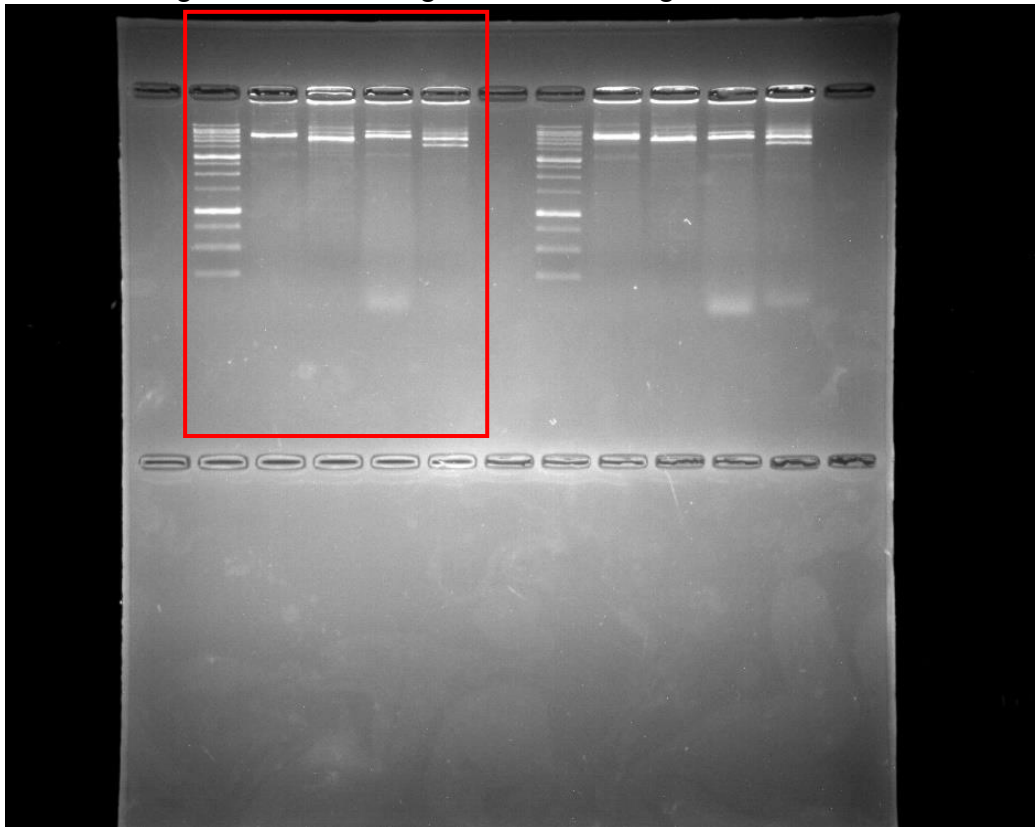

The original image of Supplementary Figure S2A

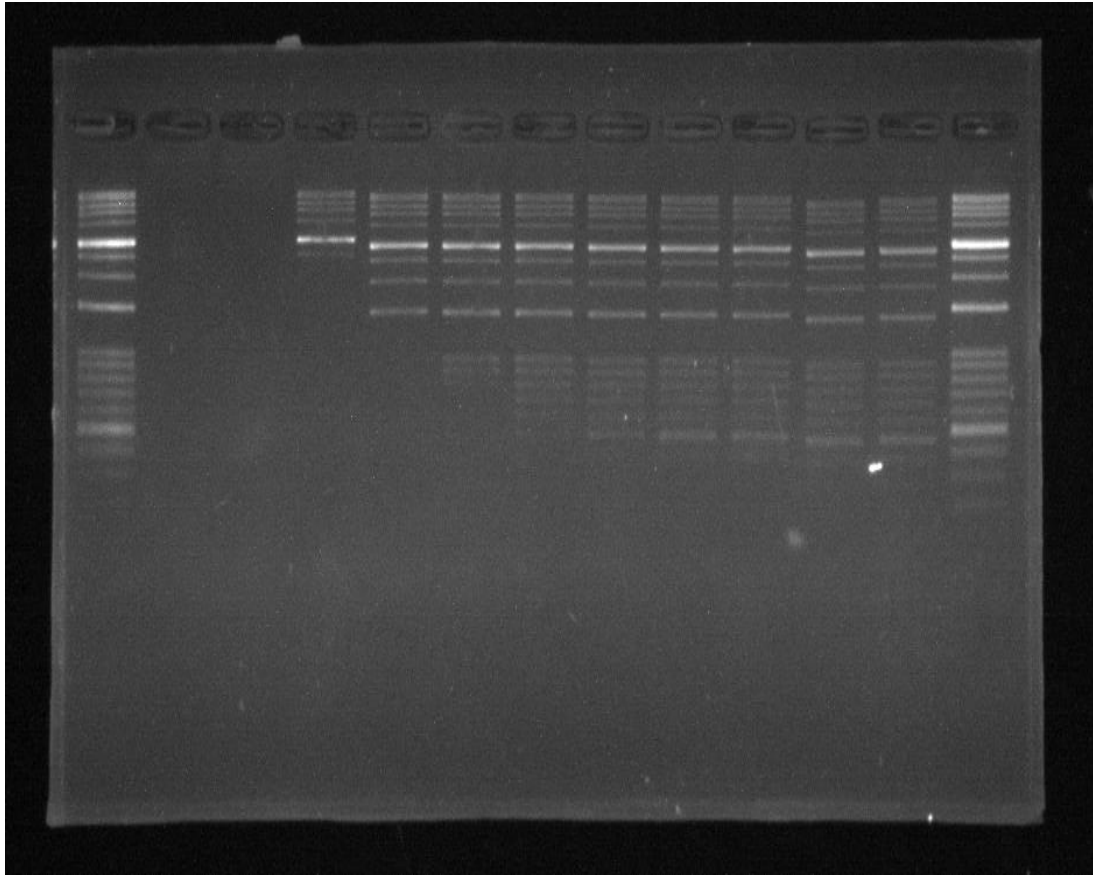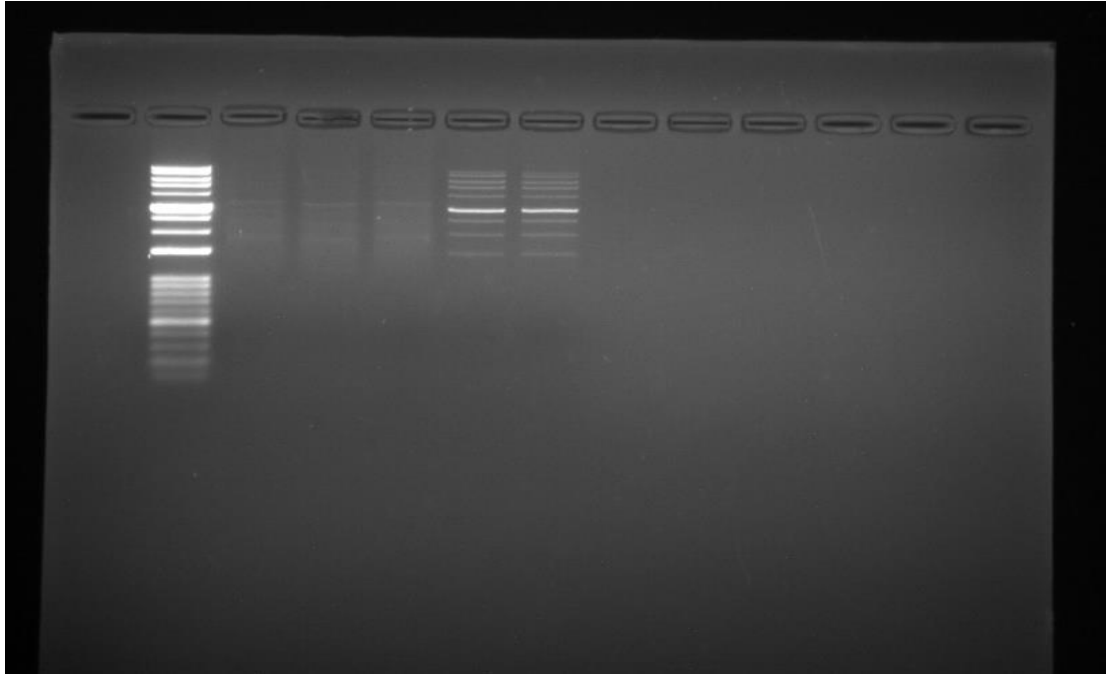

The following red-framed image is shown in Supplementary Figure S2A.

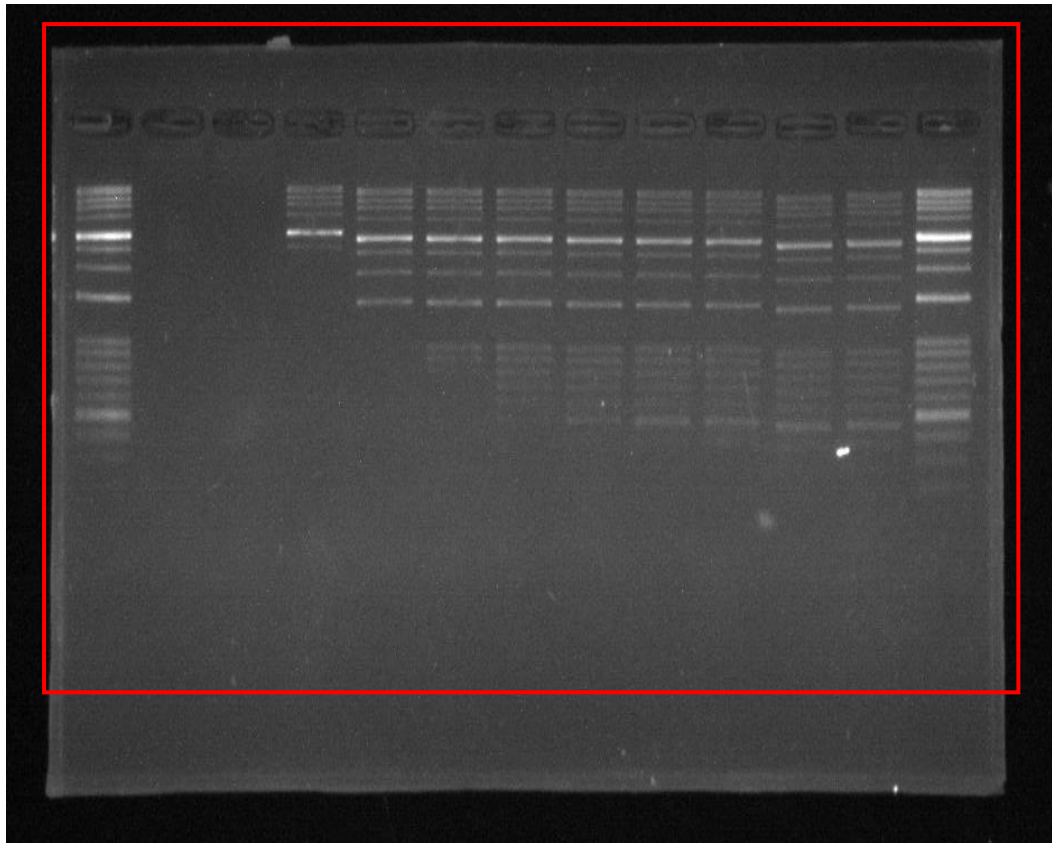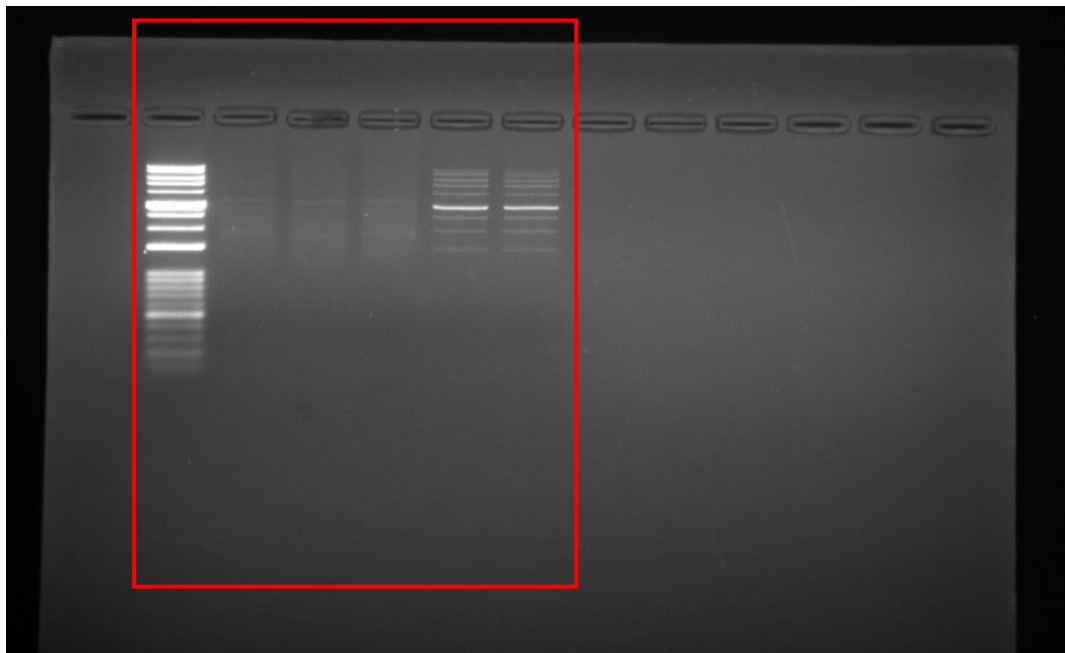

The original image of Supplementary Figure S2C

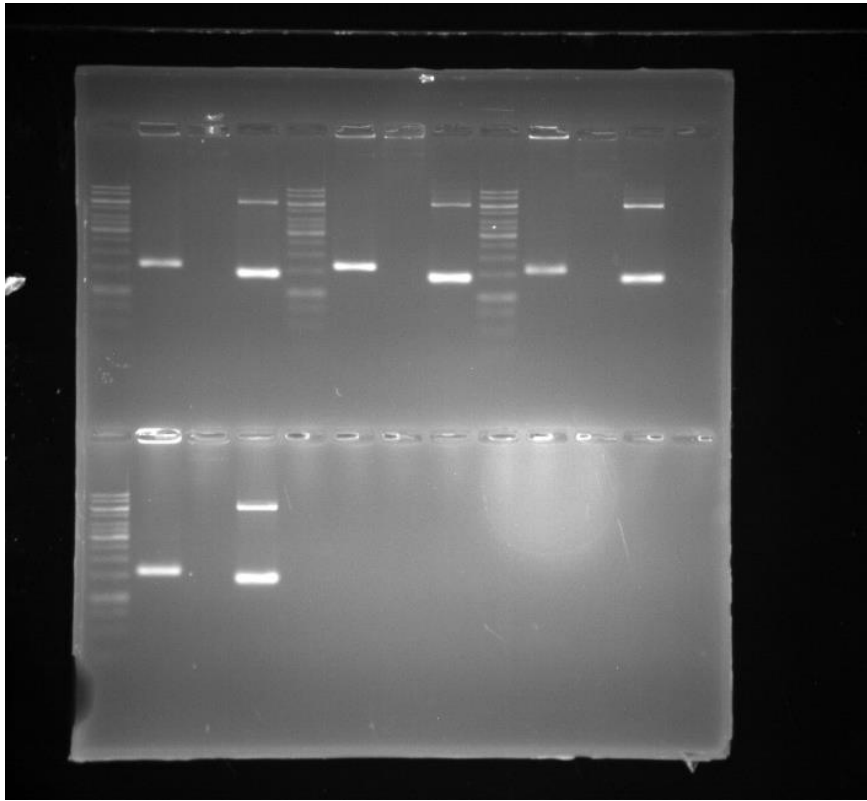

The following red-framed image is shown in Supplementary Figure S2C.

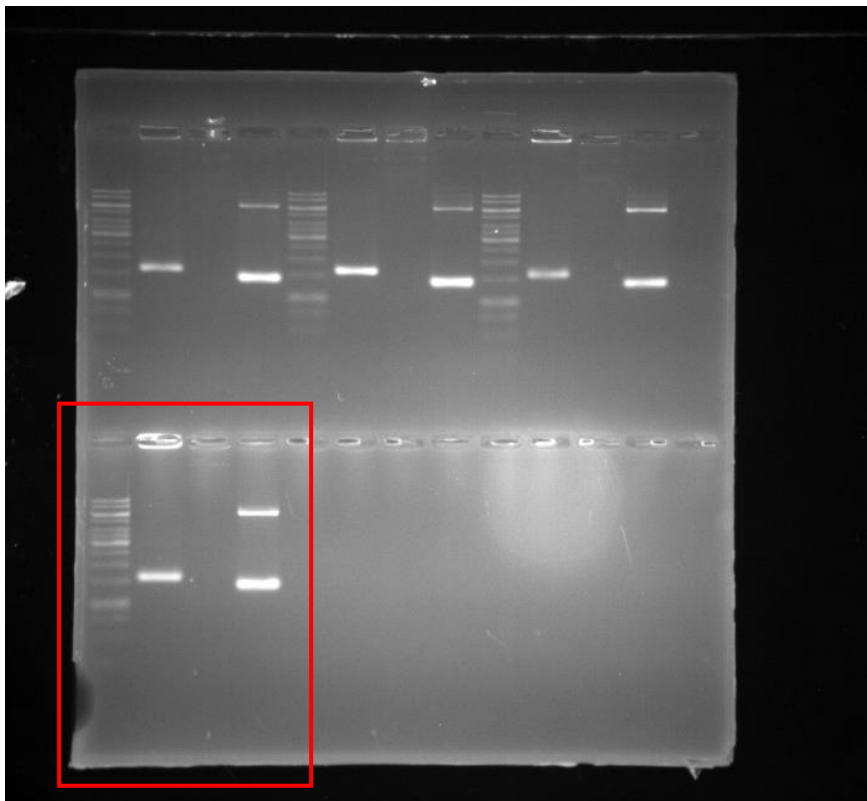

Supplement: 12864_2024_10050_MOESM2_ESM.pdf [file 12864_2024_10050_MOESM2_ESM.pdf]
