# Supplementary material for: Decoding the complexity of on-target integration: characterizing DNA insertions at the CRISPR-Cas9 targeted locus using nanopore sequencing
Source: PubMed Central journal article supplement (PMC10874558; doi:10.1186/s12864-024-10050-6), 2024-02-17
Supplement: 12864_2024_10050_MOESM1_ESM.pdf [file 12864_2024_10050_MOESM1_ESM.pdf]

**A**

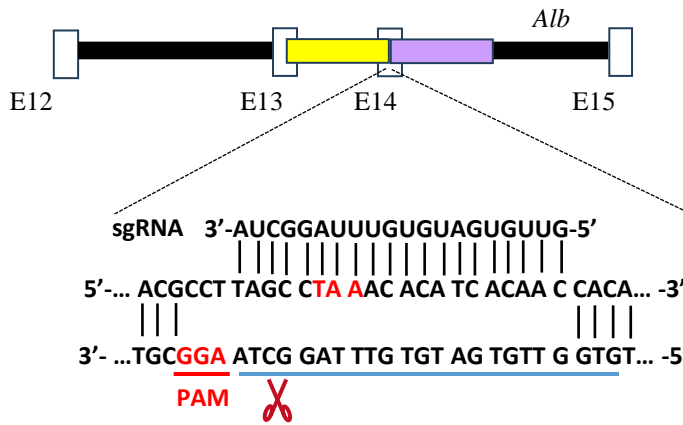

**B**

**Indels% of liver gDNA from unedited hemophilia A mouse = 0.09% (background error)**

TAGATGCAAAGACGCGCTTAGCCTAAACACATCACAAACCAC-Reference  
 sgRNA  
 TAGATGCAAAGACGCGCTTAGCCTAAACACATCACAAACCAC-98.05% (11937 reads)

**Indels% of edited HA mouse liver after injection of F8 donor plasmid only = 0.10% (background error)**

TAGATGCAAAGACGCGCTTAGCCTAAACACATCACAAACCAC-Reference  
 sgRNA  
 TAGATGCAAAGACGCGCTTAGCCTAAACACATCACAAACCAC-97.98% (42335 reads)

**Indels% of edited HA mouse liver after injection with CRISPR plasmids only = 10.5%**

TAGATGCAAAGACGCGCTTAGCCTAAACACATCACAAACCAC-Reference  
 sgRNA

|                                            |                       |
|--------------------------------------------|-----------------------|
| TAGATGCAAAGACGCGCTTAGCCTAAACACATCACAAACCAC | -87.59% (24415 reads) |
| TAGATGCAAAGACGCGCTTAACCTAAACACATCACAAACCAC | -2.24% (625 reads)    |
| TAGATGCAAAGACGCGCTTAGCTAAACACATCACAAACCAC  | -1.73% (481 reads)    |
| TAGATGCAAAGACGCGCTTAACTAAACACATCACAAACCAC  | -1.47% (411 reads)    |
| TAGATGCAAAGACGCGCTTAGCTAAACACATCACAAACCAC  | -0.76% (212 reads)    |
| TAGATGCAAAGACGCGCTTAACTAAACACATCACAAACCAC  | -0.60% (168 reads)    |
| TAGATGCAAAGACGCGCTTAACTAAACACATCACAAACCAC  | -0.46% (129 reads)    |
| TAGATGCAAAGACGCGCTTAACTAAACACATCACAAACCAC  | -0.30% (85 reads)     |
| TAGATGCAAAGACGCGCTTAACTAAACACATCACAAACCAC  | -0.25% (71 reads)     |
| TAGATGCAAAGACGCGCTTAACTAAACACATCACAAACCAC  | -0.21% (59 reads)     |
| TAGATGCAAAGACGCGCTTAACTAAACACATCACAAACCAC  | -0.21% (58 reads)     |

**Indels% of edited HA mouse liver after injection of CRISPR and F8 donor plasmids = 11.53%**

TAGATGCAAAGACGCGCTTAGCCTAAACACATCACAAACCAC-Reference  
 sgRNA

|                                            |                       |
|--------------------------------------------|-----------------------|
| TAGATGCAAAGACGCGCTTAGCCTAAACACATCACAAACCAC | -86.48% (38092 reads) |
| TAGATGCAAAGACGCGCTTAACTAAACACATCACAAACCAC  | -2.03% (894 reads)    |
| TAGATGCAAAGACGCGCTTAACTAAACACATCACAAACCAC  | -1.93% (849 reads)    |
| TAGATGCAAAGACGCGCTTAACTAAACACATCACAAACCAC  | -1.64% (723 reads)    |
| TAGATGCAAAGACGCGCTTAACTAAACACATCACAAACCAC  | -0.92% (404 reads)    |
| TAGATGCAAAGACGCGCTTAACTAAACACATCACAAACCAC  | -0.84% (372 reads)    |
| TAGATGCAAAGACGCGCTTAACTAAACACATCACAAACCAC  | -0.53% (232 reads)    |
| TAGATGCAAAGACGCGCTTAACTAAACACATCACAAACCAC  | -0.34% (149 reads)    |
| TAGATGCAAAGACGCGCTTAACTAAACACATCACAAACCAC  | -0.27% (117 reads)    |
| TAGATGCAAAGACGCGCTTAACTAAACACATCACAAACCAC  | -0.24% (106 reads)    |
| TAGATGCAAAGACGCGCTTAACTAAACACATCACAAACCAC  | -0.21% (93 reads)     |
| TAGATGCAAAGACGCGCTTAACTAAACACATCACAAACCAC  | -0.21% (91 reads)     |

**Figure S1. sgRNA Design and Indel Frequencies at the Alb Locus.** (A) An sgRNA (sgAlb-E14) was designed to target the sequence surrounding the stop codon TAA (shown in red, reverse complement) in Exon 14 of the Alb gene. The red scissors icon indicates the anticipated Cas9 cleavage site, with "PAM" denoting the protospacer-adjacent motif (PAM) for SpCas9, recognized as NGG. (B) Frequencies of indels observed at the Alb locus following in vivo editing in the liver of hemophilia A mice. One week after the injection of editing plasmids, the sequence adjacent to the editing site was amplified from liver genomic DNA and subsequently analyzed using next-generation sequencing (NGS) and CRISPResso2.

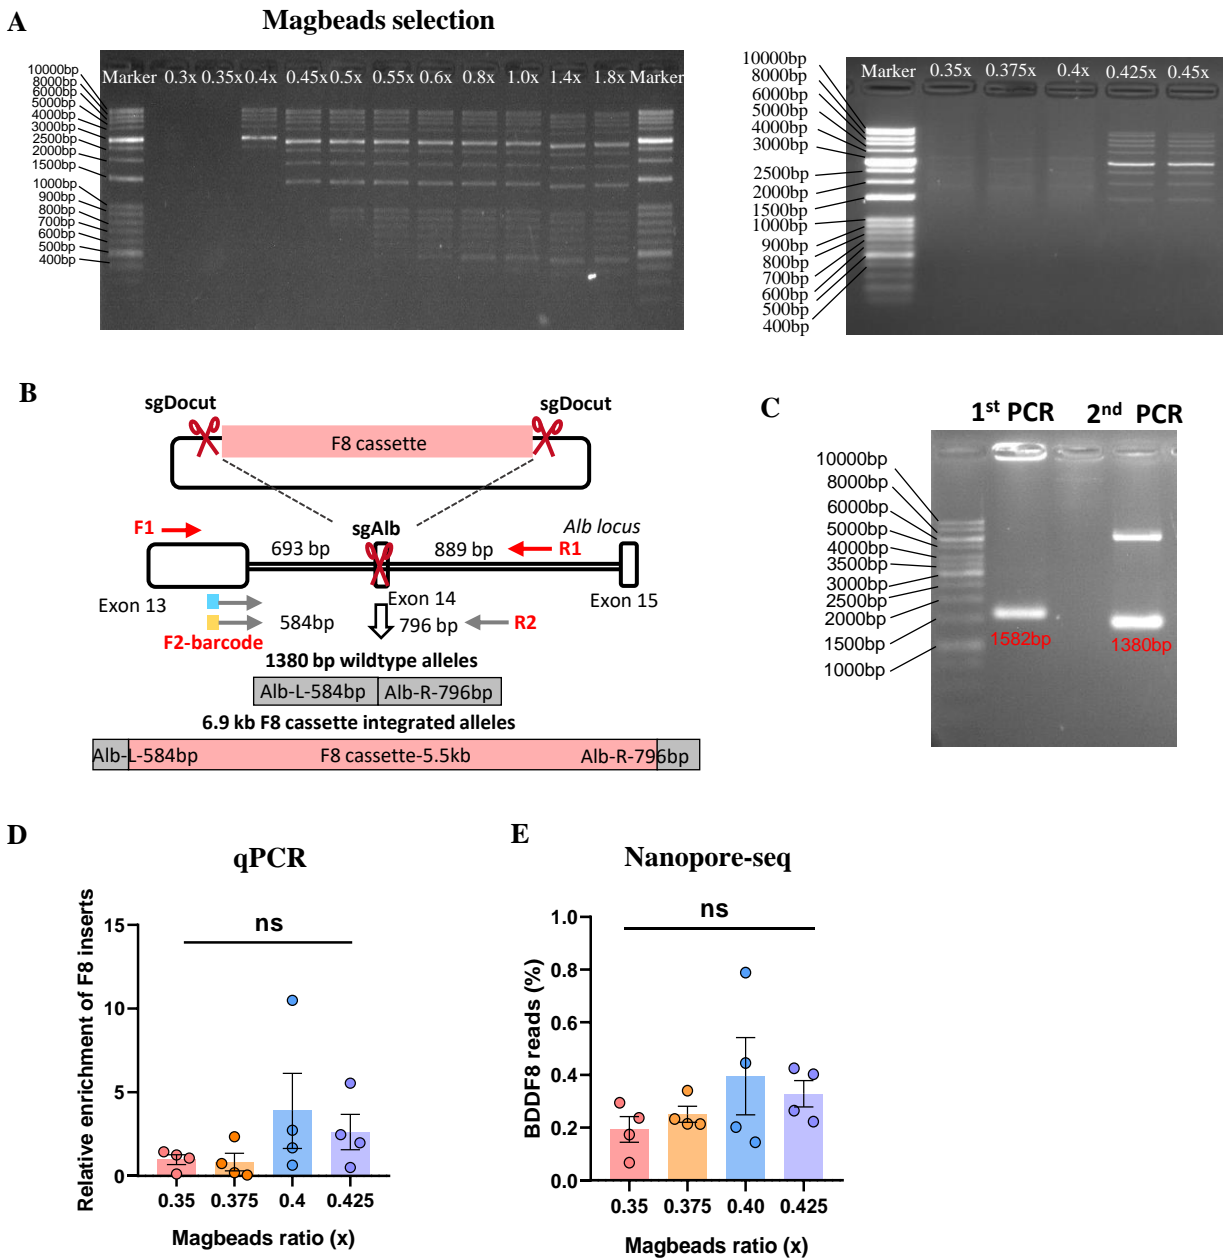

**Figure S2. Optimizing Magnetic Beads for the Enrichment of F8-Integrated Alleles.** (A) Evaluation of size selection efficiency using various ratios of magnetic beads (0.3x-1.8x). (B) Primer design for nested PCR, depicting expected PCR products, including the 1380bp wildtype alleles and the approximately 6.9kb F8 cassette-integrated alleles. (C) Representative results of gel electrophoresis for the 1st PCR products and the 2nd PCR products, which were amplified from the 1st PCR products after size selection using a beads ratio of 0.4x. The bands corresponding to alleles lacking donor insertion in the 1st and 2nd PCR products were 1586bp and 1380bp, respectively. (D) Relative enrichment of F8 inserts determined by qPCR after size selection using magnetic beads at various ratios. Error bars represent the mean  $\pm$  SEM,  $n = 4$ , and paired two-sided Student's  $t$ -tests were performed. (E) Determination of the percentage of both forward and reverse F8 inserts by nanopore sequencing (F8 reads %) in the 2nd PCR products following size selection of the purified 1st PCR products using different ratios of magnetic beads. Error bars represent the mean  $\pm$  SEM,  $n = 4$ , and paired two-sided Student's  $t$ -tests were conducted.

Size selection-None

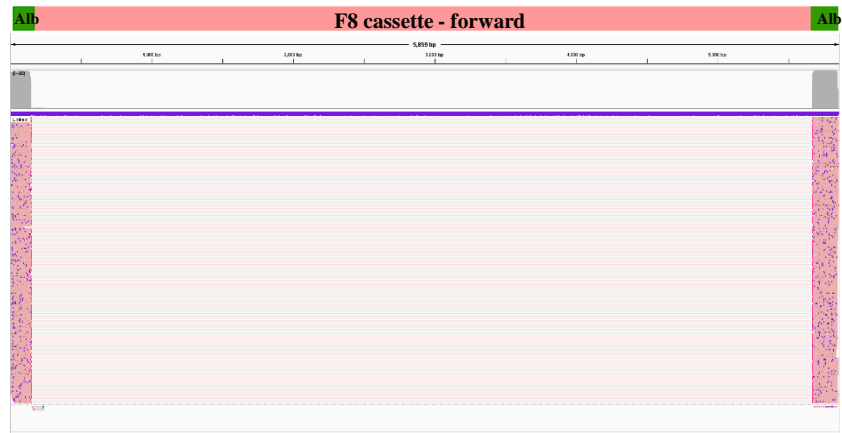

Size selection-Once

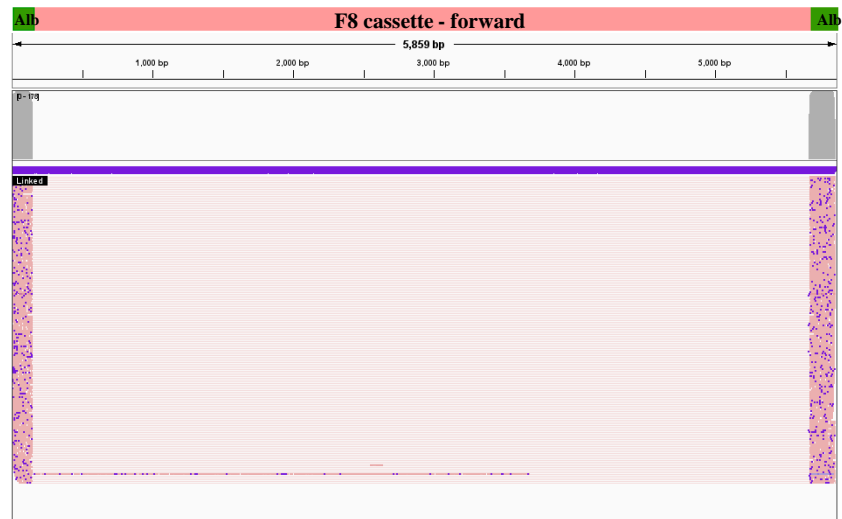

Size selection-Twice

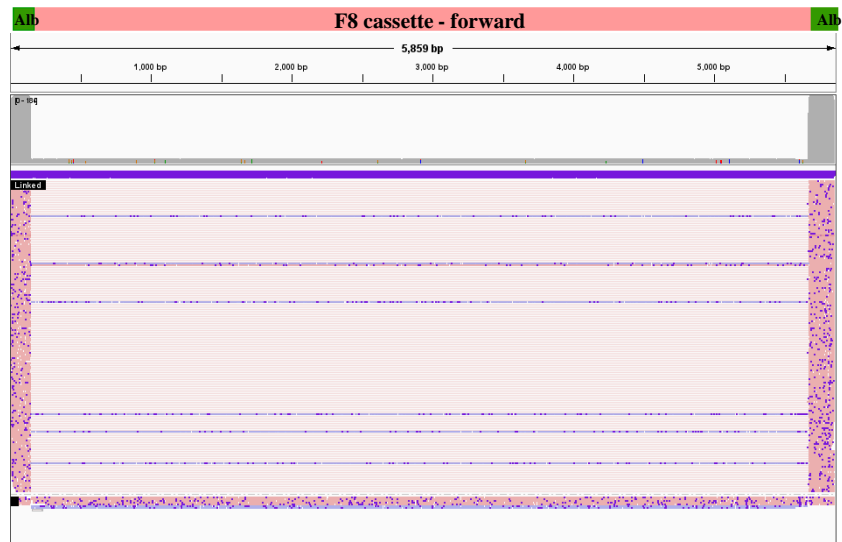

**Figure S3. Visualization of Sequencing Results for 2nd PCR Amplicons after Magnetic Beads Size Selection.** The reference sequence of the F8 cassette is flanked by 332bp of the Alb genomic sequence. Representative Integrated Genome Viewer (IGV) images display nanopore sequencing results after size selection of the 1st PCR products using magnetic beads 0 (above), 1 (middle), or 2 (bottom) times.

**A Optimization of annealing temperature**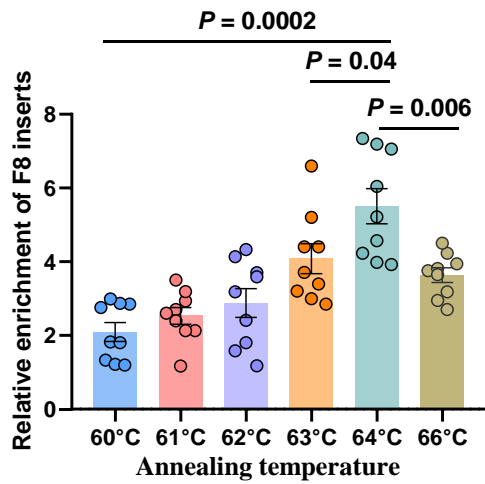**B 1<sup>st</sup> PCR program**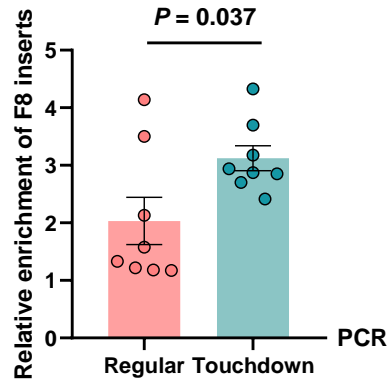

**Figure S4. PCR Conditions Optimization for Enhanced Amplification of F8 Inserts.** (A) Optimization of annealing temperature in the 1st PCR to improve the amplification of F8 inserts. The relative enrichment of amplicons with F8 inserts was determined using qPCR. Error bars represent the mean  $\pm$  SEM,  $n = 9$ , and paired two-sided Student's t-tests were performed. (B) Employment of a touchdown PCR program in the 1st PCR to increase the amplification of F8 inserts. The touchdown PCR program used was 6 cycles of [98°C for 10s, 68°C (-1°C/cycle) for 15s, 68°C for 6.5min]; followed by 25 cycles of [98°C for 10s, 62°C for 15s, 68°C for 6.5min]. Error bars indicate the mean  $\pm$  SEM,  $n = 8$ , and paired two-sided Student's t-tests were conducted.

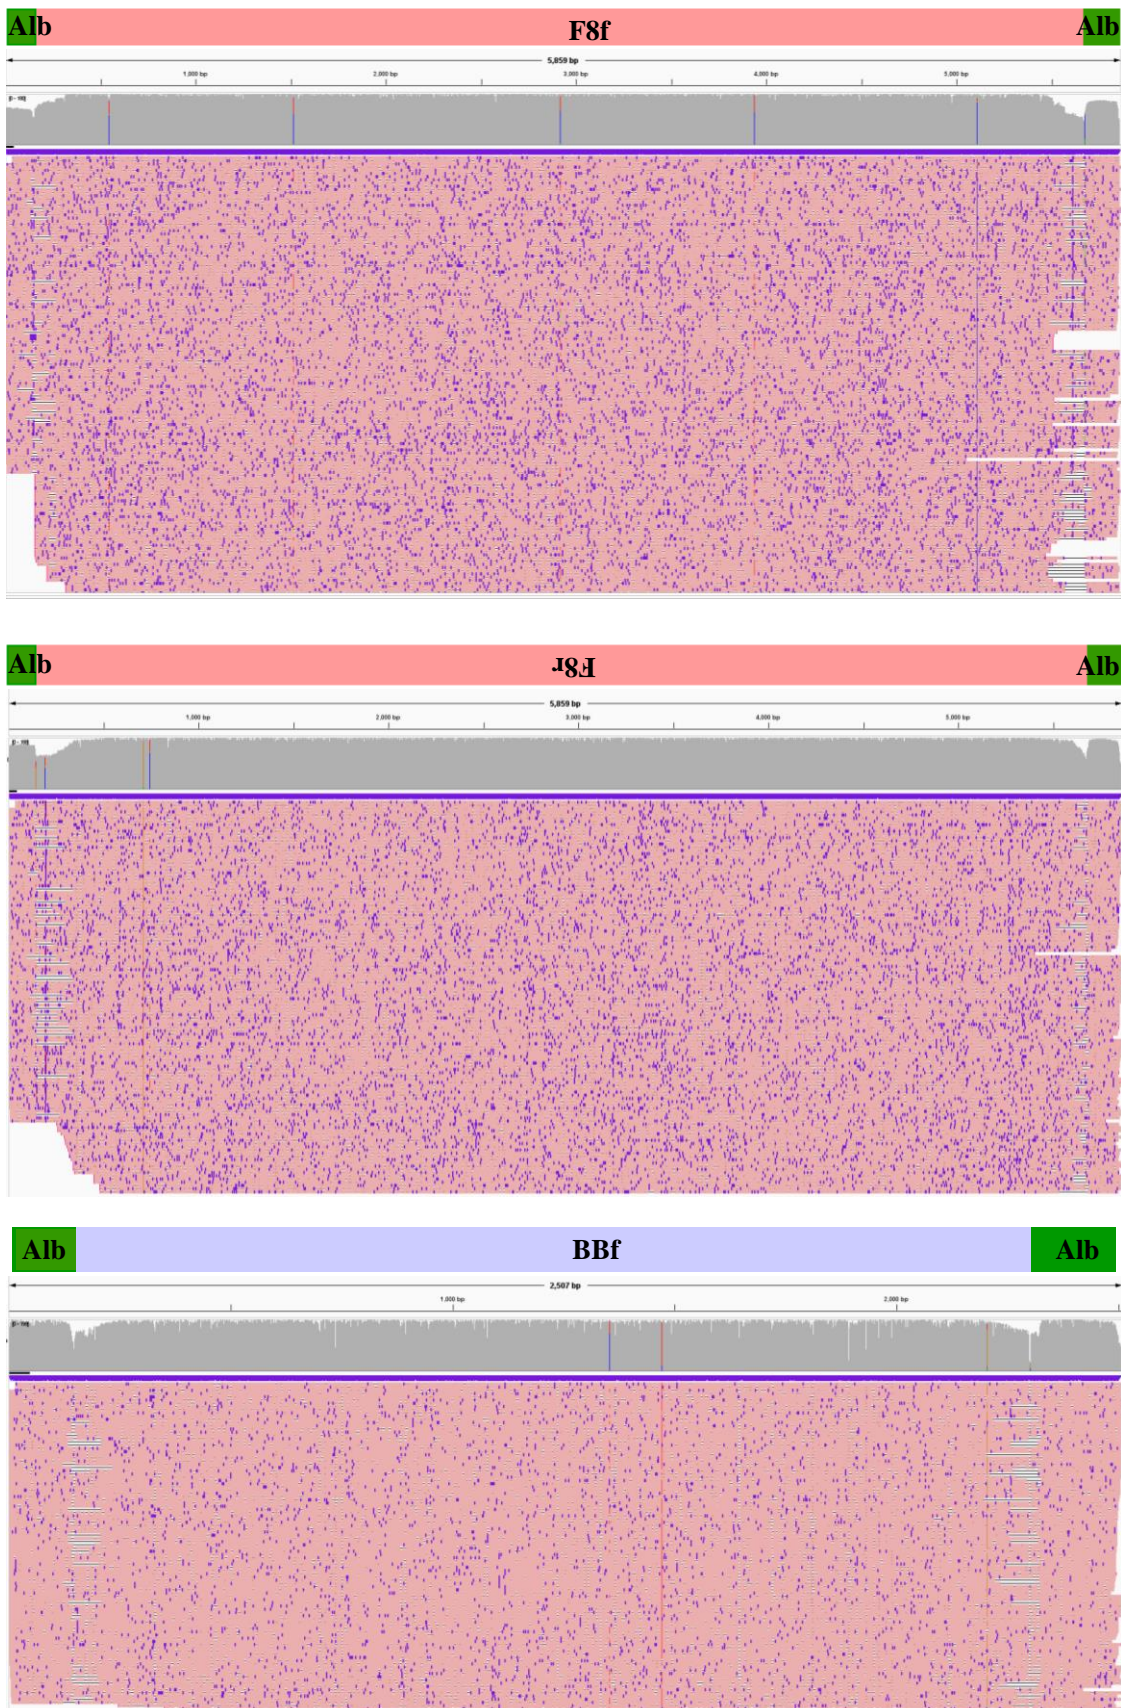

**Figure S5.** Random 200 reads in the visualization of eight representative insertion patterns of the donor template in Figure 5E. The F8 cassette is abbreviated as F8, and the plasmid backbone is abbreviated as BB. Forward insertions are abbreviated as f, and reverse insertions are abbreviated as r. (continued).

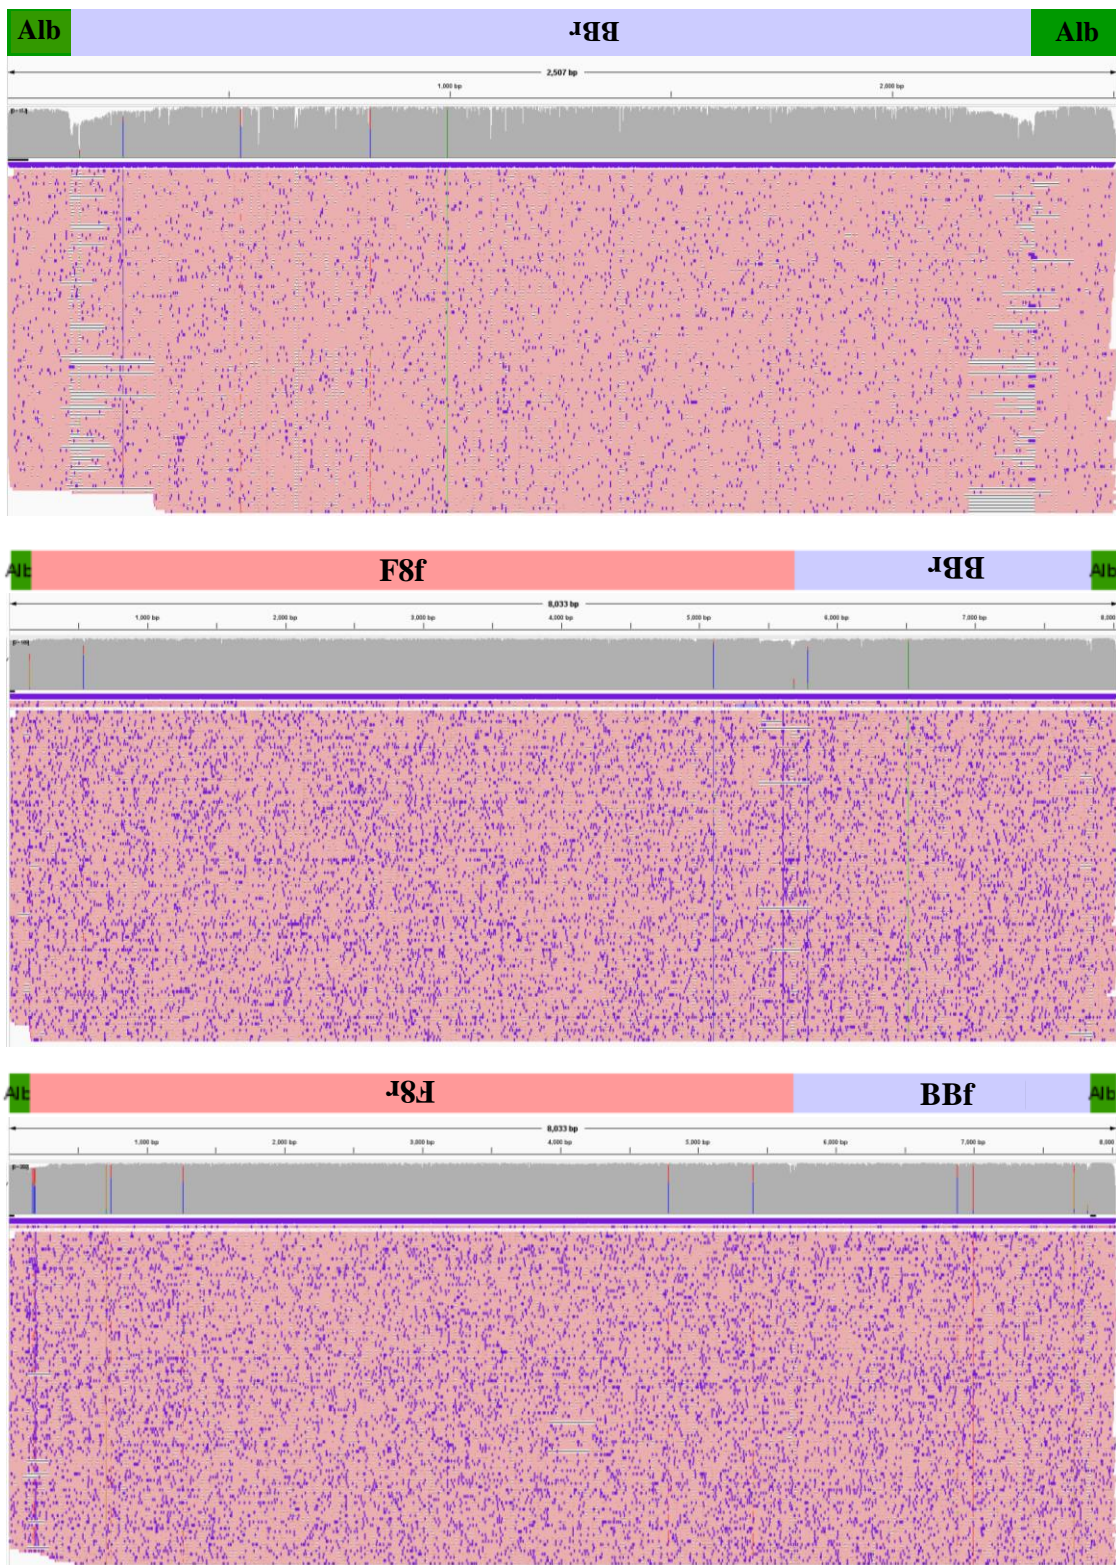

**Figure S5. Visualization of Insertion Patterns:** This figure presents the visualization of 200 randomly selected reads showcasing eight representative insertion patterns of the donor template, as depicted in Figure 5E. The insertions include components from the F8 cassette (abbreviated as F8) and the plasmid backbone (abbreviated as BB). The orientation of these insertions is also indicated, with forward insertions abbreviated as 'f' and reverse insertions as 'r'. This visualization aids in understanding the diversity and orientation of the insertions at the targeted genomic site. (Continued)

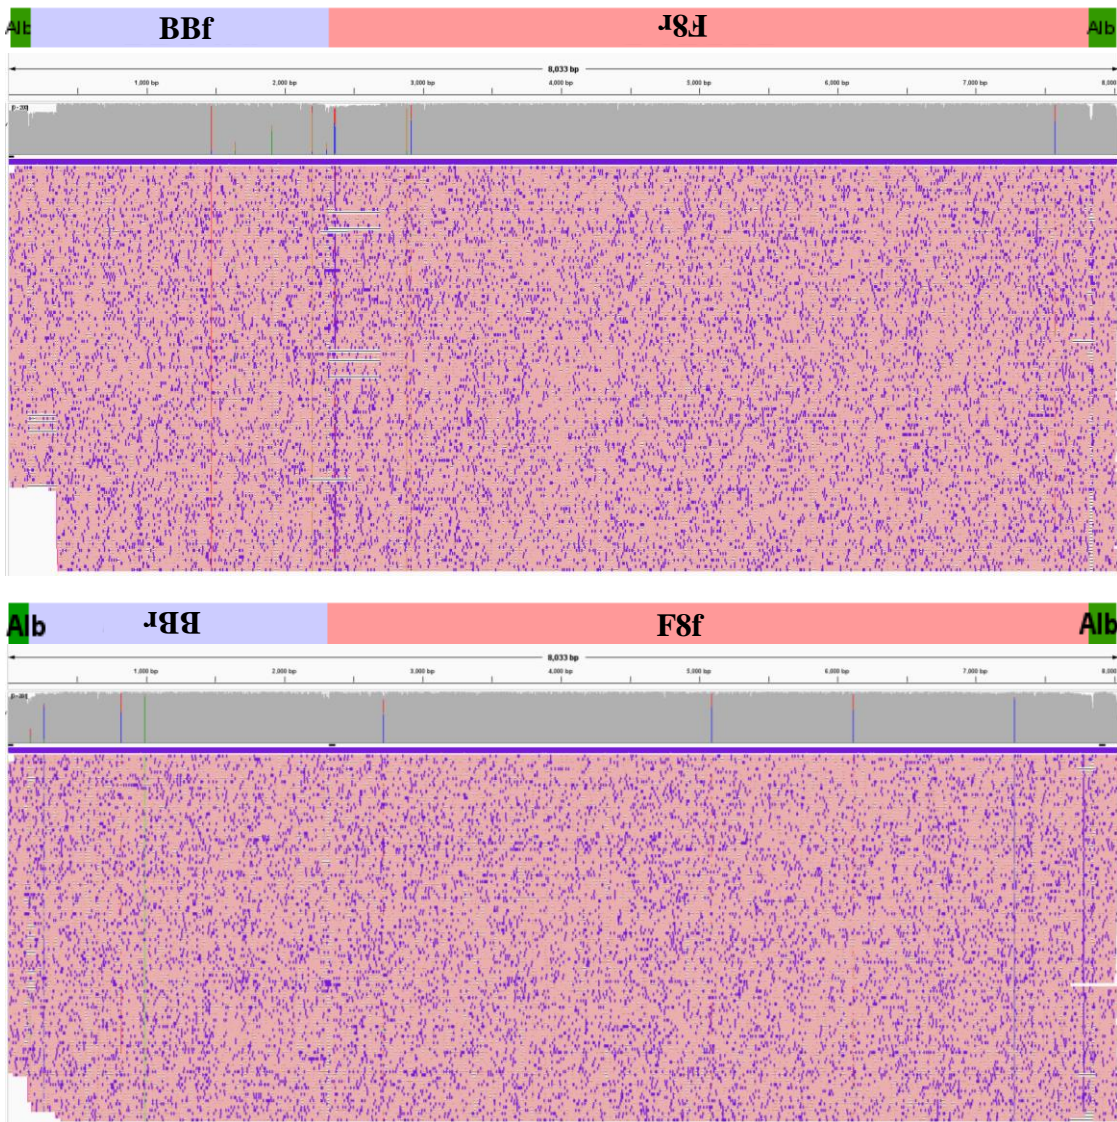

**Figure S5. Visualization of Insertion Patterns:** This figure presents the visualization of 200 randomly selected reads showcasing eight representative insertion patterns of the donor template, as depicted in Figure 5E. The insertions include components from the F8 cassette (abbreviated as F8) and the plasmid backbone (abbreviated as BB). The orientation of these insertions is also indicated, with forward insertions abbreviated as 'f' and reverse insertions as 'r'. This visualization aids in understanding the diversity and orientation of the insertions at the targeted genomic site.

## A Schematic of insertions of multiple double-cut donor fragments

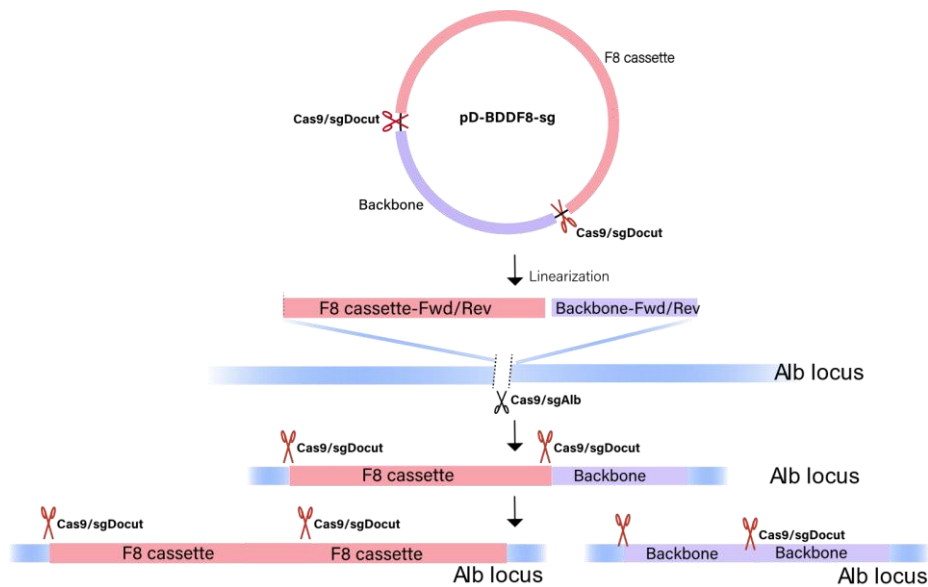

## B Additional two-fragment integrations

**F8fBBf inserts = 0.35%. Shows 10 out of 79 reads.**

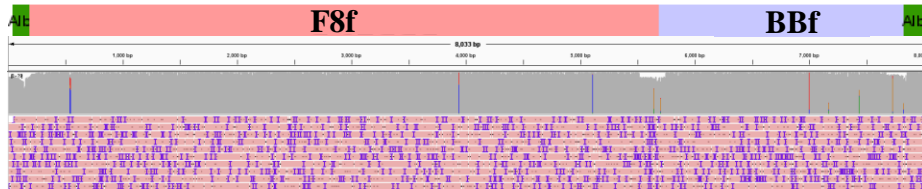

**F8rBBr inserts = 0.24%. Shows 10 out of 54 reads.**

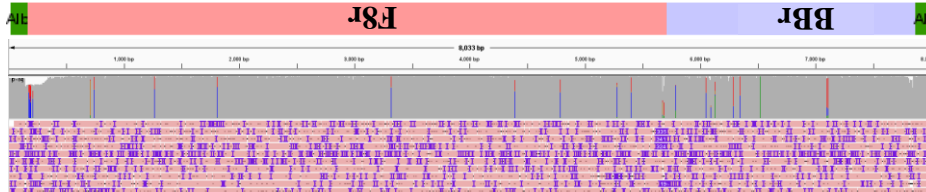

**BBrF8r inserts = 0.22%. Shows 10 out of 51 reads.**

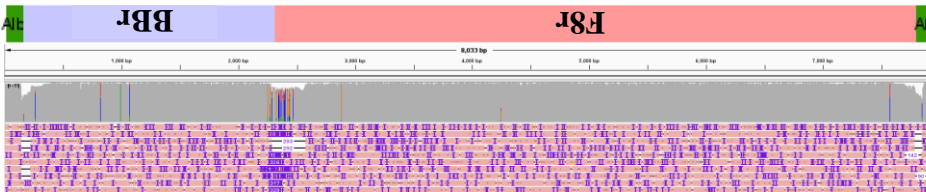

**BBfF8f inserts = 0.09%. Shows 10 out of 22 reads.**

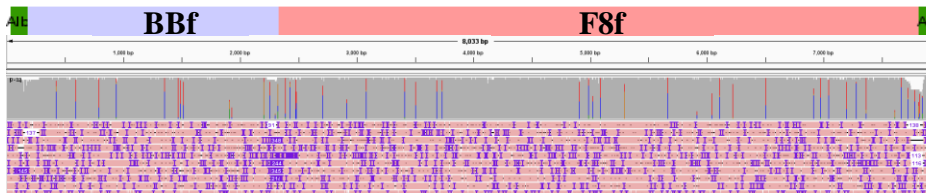

**Figure S6. Characterization of Multi-Fragment Insertions from Double-Cut Donor Plasmid Following Cas9-sgRNA Linearization.** The orientation of these insertions is indicated, with forward insertions abbreviated as 'f' and reverse insertions as 'r'. (A) Schematic representation of multi-fragment insertions resulting from the linearization of the double-cut donor plasmid. Following linearization, multiple fragments can integrate, albeit at lower frequencies. (B) Visualization of additional two-fragment integrations not shown in Figure 5, including four patterns of F8 and BB insertions in both orientations.



**BBrBBr inserts = 0.22%. Shows 10 out of 49 reads.**

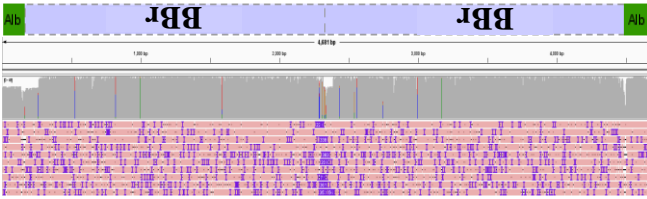

**BBfBBf inserts = 0.20%. Shows 10 out of 46 reads.**

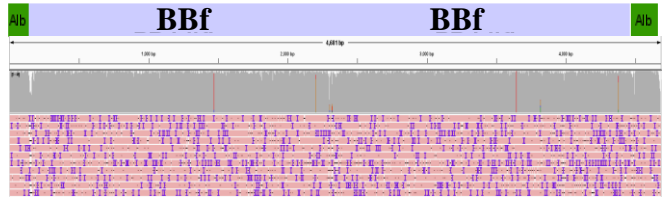

**BBfBBr inserts = 0.04%. Shows 9 out of 9 reads.**

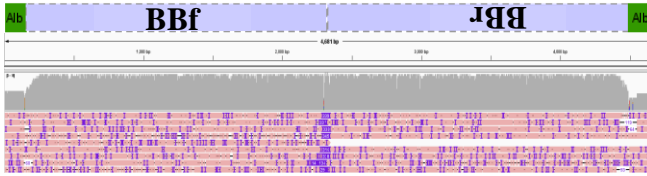

**BBrBBf inserts = 0.04%. Shows 8 out of 8 reads.**

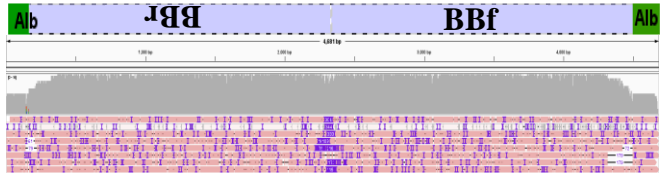

**F8rF8r inserts = 0.08%. Shows 10 out of 19 reads.**

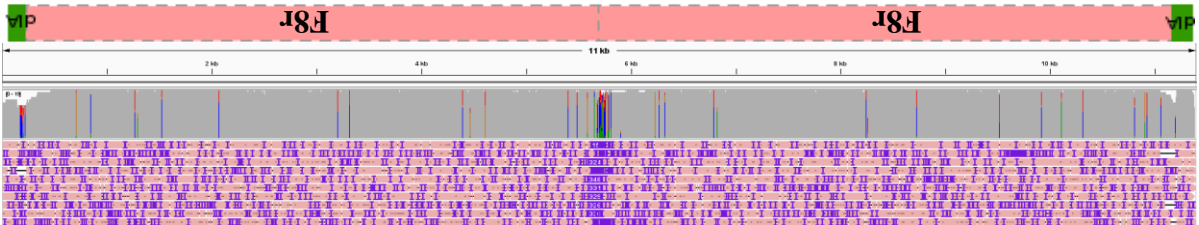

**F8fF8f inserts = 0.08%. Shows 10 out of 17 reads.**

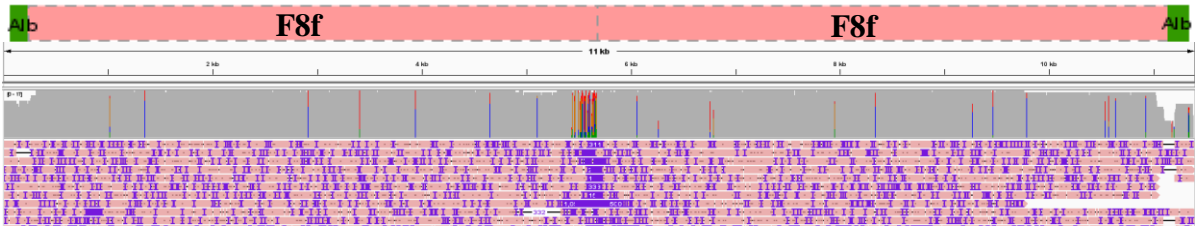

**F8fF8r inserts = 0.05%. Shows 10 out of 11 reads.**

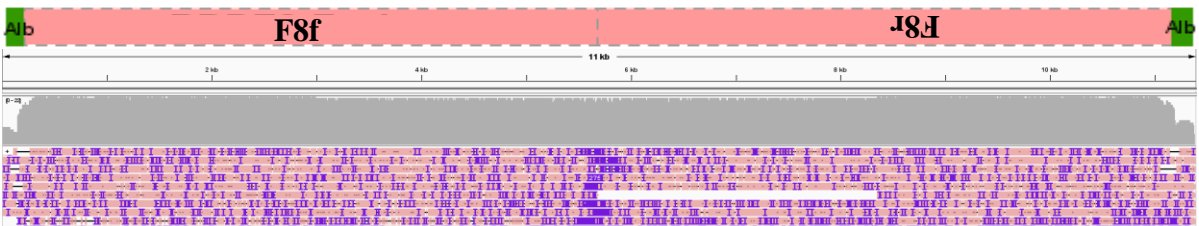

**F8rF8f inserts = 0.03%. Shows 8 out of 8 reads.**

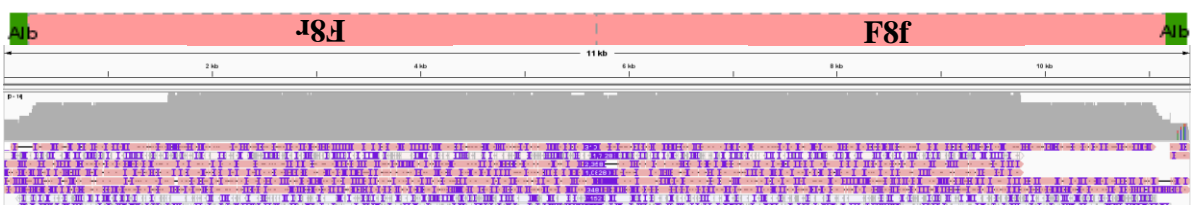

**Figure S6B. Visualization of additional two-fragment integrations not shown in Figure 5, including four patterns of F8 and BB insertions in both orientations (continued).**

**C Three-fragment insertions: BB+BB+F8**

**F8fBBrBBr inserts = 0.02%. Shows 5 out of 5 reads.**

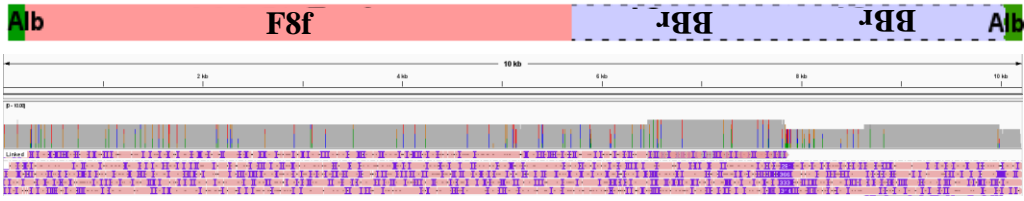

**F8rBBfBBr inserts = 0.01%. Shows 3 out of 3 reads.**

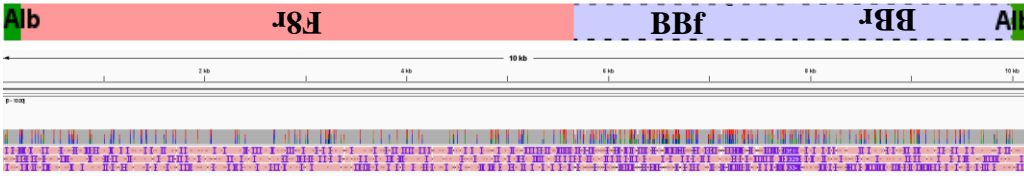

**F8fBBfBBf = 0.004%. Shows 1 out of 1 read.**

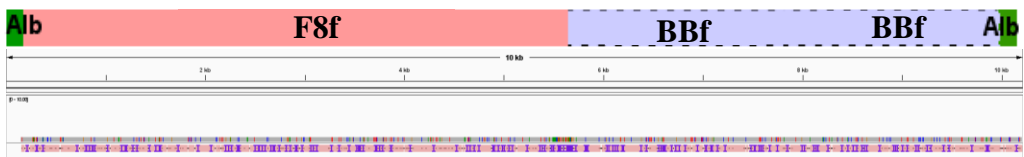

**F8fBBfBBr = 0.004%. Shows 1 out of 1 read.**

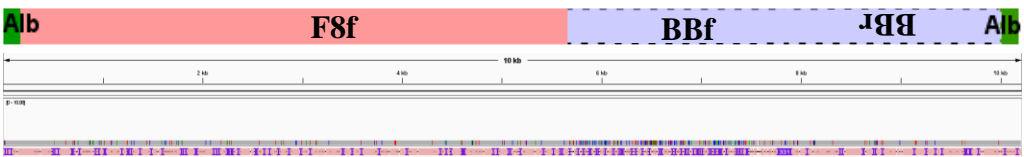

**F8fBBrBBf = 0.004%. Shows 1 out of 1 read.**

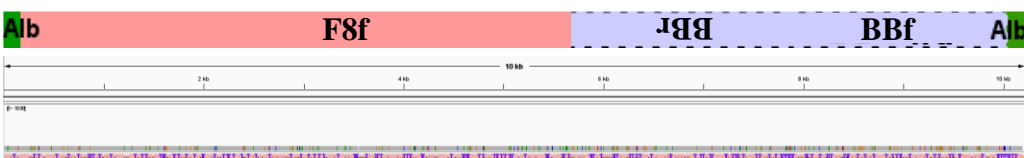

**F8rBBfBBf = 0.004%. Shows 1 out of 1 read.**

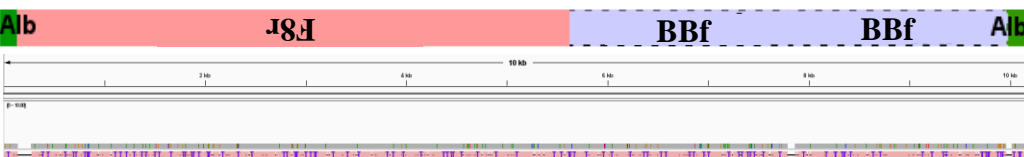

**BBfF8rBBr inserts = 0.01%. Shows 3 out of 3 reads.**

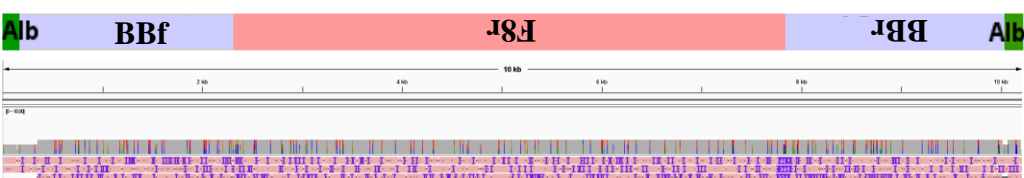

**BBrF8fBBf = 0.004%. Shows 1 out of 1 read.**

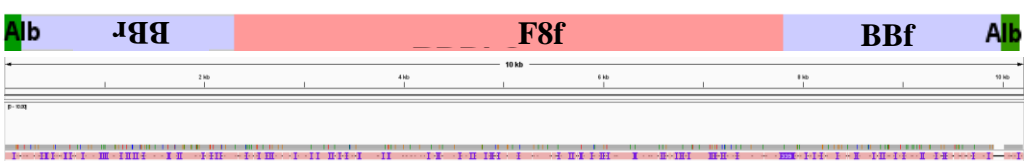

**Figure S6C. Visualization of three-fragment insertions, specifically the insertion of two plasmid backbone fragments and one F8 fragment.**

**BBrF8rBBf = 0.004%. Shows 1 out of 1 reads.**

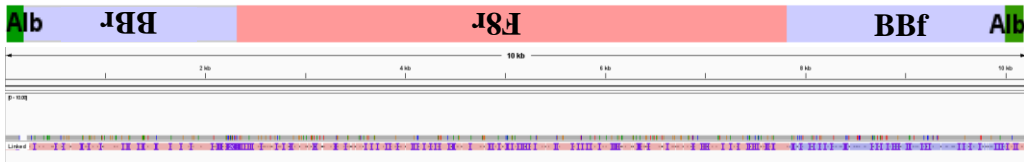

**BBfBBfF8r inserts = 0.03%. Shows 6 out of 6 reads.**

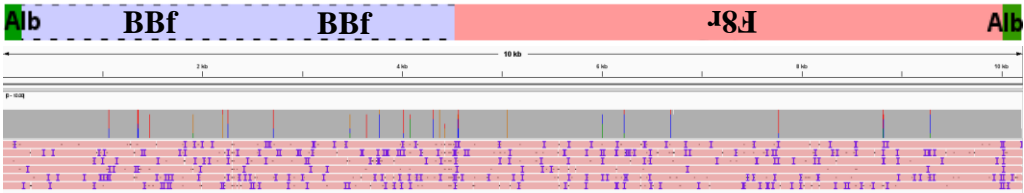

**BBrBBrF8f inserts = 0.02%. Shows 4 out of 4 reads.**

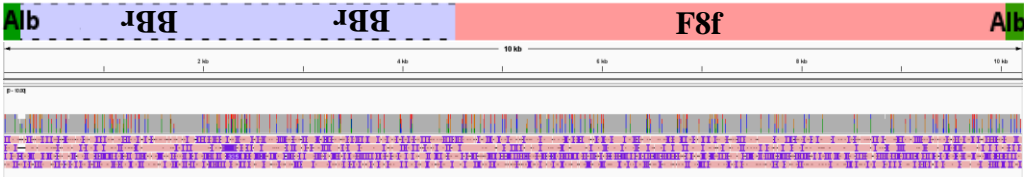

**BBrBBfF8r inserts = 0.01%. Shows 3 out of 3 reads.**

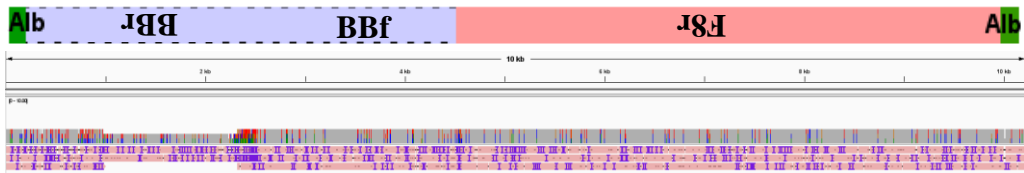

**BBfBBrF8r inserts = 0.004%. Shows 1 out of 1 reads.**

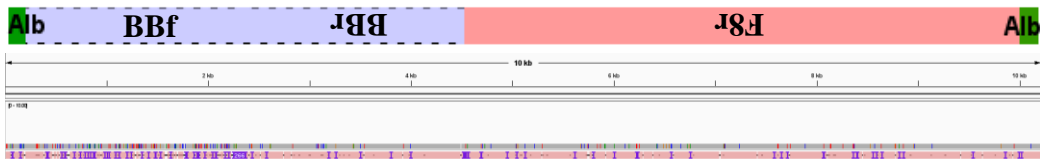

**BBfBBrF8f inserts = 0.004%. Shows 1 out of 1 reads.**

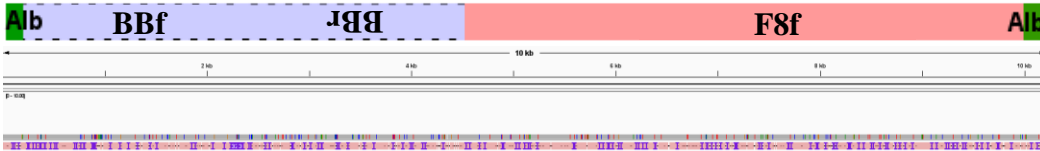

**Figure S6C. Visualization of three-fragment insertions, specifically the insertion of two plasmid backbone fragments and one F8 fragment (continued).**

## D Three-fragment insertions: BB+F8+F8

**BBrF8fF8f** inserts = 0.01%. Shows 3 out of 3 reads.

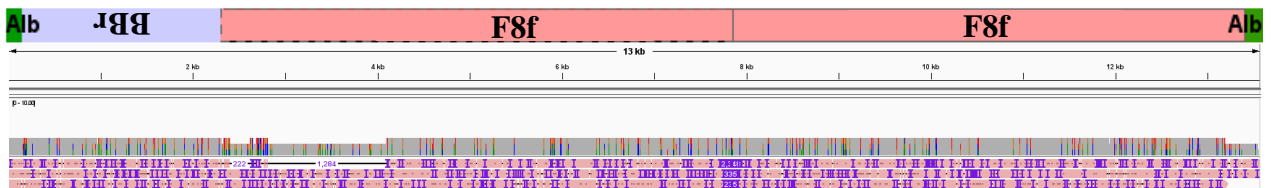

**BBfF8rF8f** inserts = 0.01%. Shows 2 out of 2 reads.

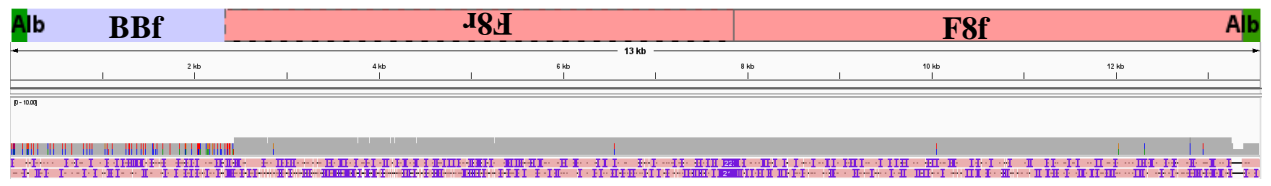

**BBrF8rF8f** inserts = 0.01%. Shows 2 out of 2 reads.

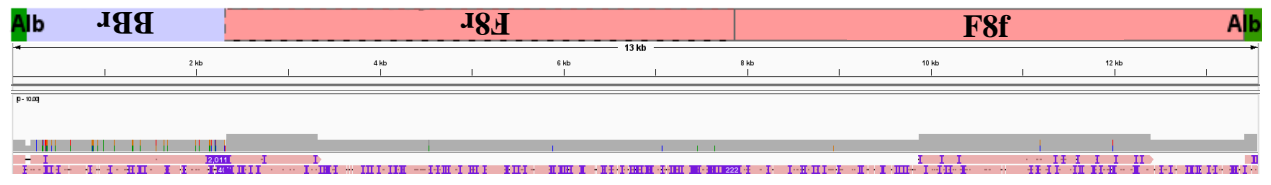

**BBfF8fF8f** inserts = 0.004%. Shows 1 out of 1 reads.

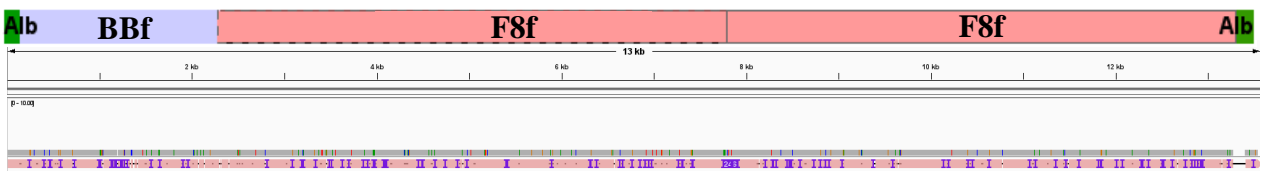

**BBfF8rF8r** inserts = 0.004%. Shows 1 out of 1 read.

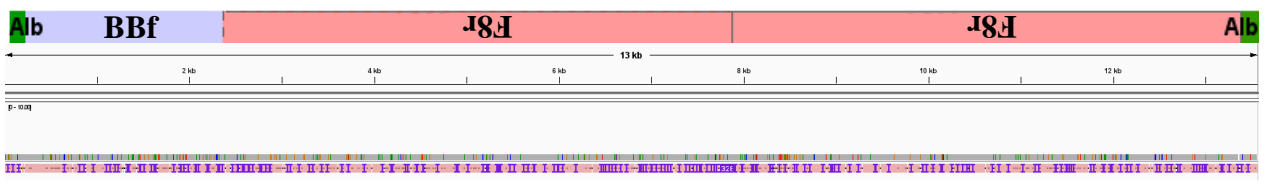

**BBrF8fF8r** inserts = 0.004%. Shows 1 out of 1 read.

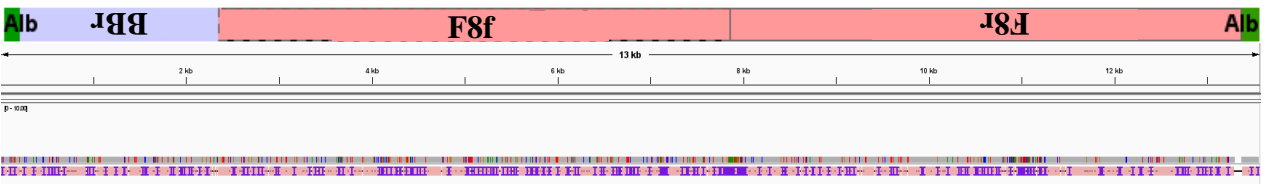

**F8fBBrF8f** inserts = 0.03%. Shows 7 out of 7 reads.

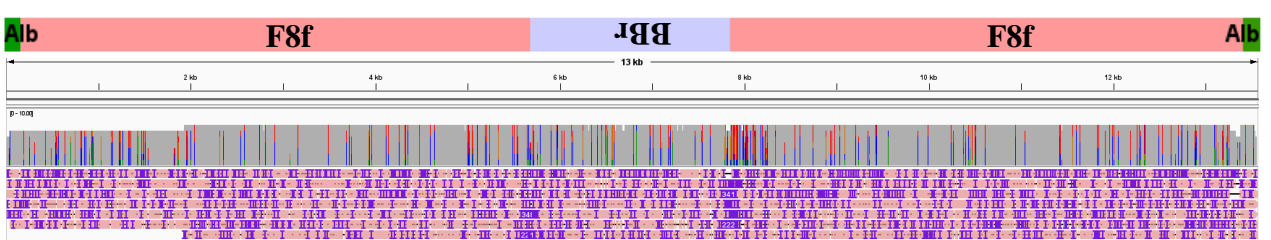

**F8fBBrF8r** inserts = 0.03%. Shows 6 out of 6 reads.

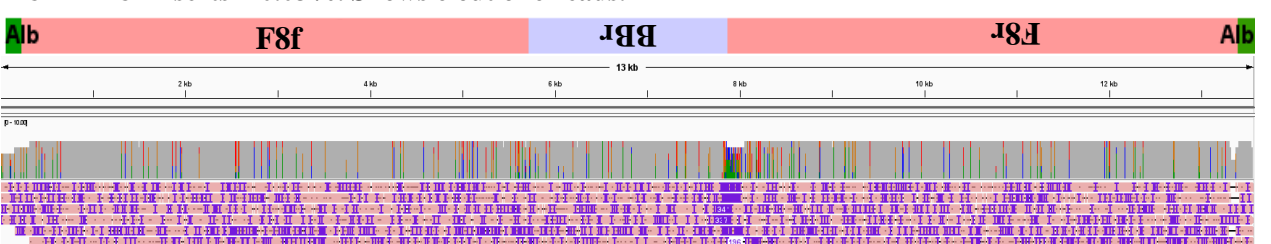

Figure S6D. Visualization of three-fragment insertions, specifically the insertion of one plasmid backbone fragment and two F8 fragments.

**F8fBBfF8r inserts = 0.02%. Shows 4 out of 4 reads.**

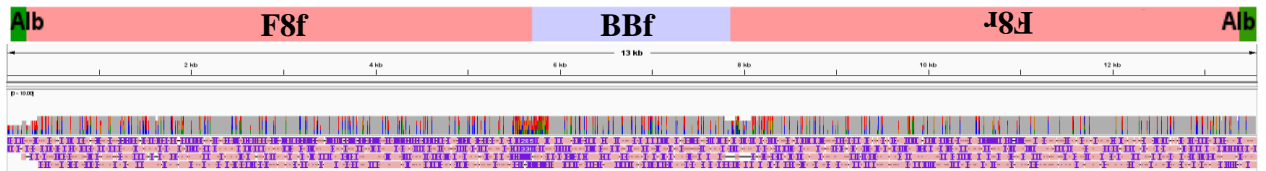

**F8rBBfF8r inserts = 0.02%. Shows 4 out of 4 reads.**

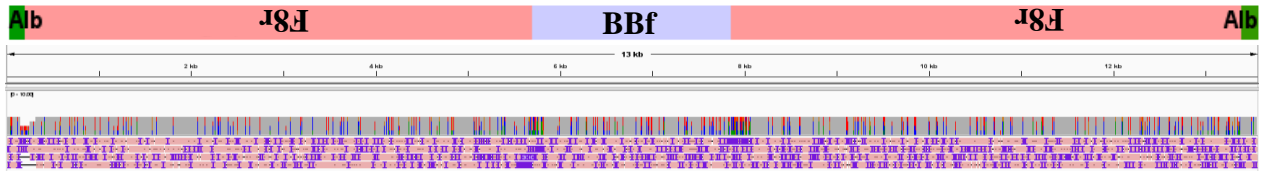

**F8rBBfF8f inserts = 0.01%. Shows 3 out of 3 reads.**

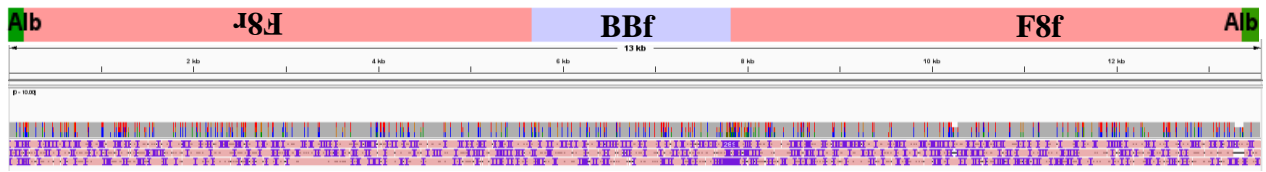

**F8fBBfF8f inserts = 0.004%. Shows 1 out of 1 read.**

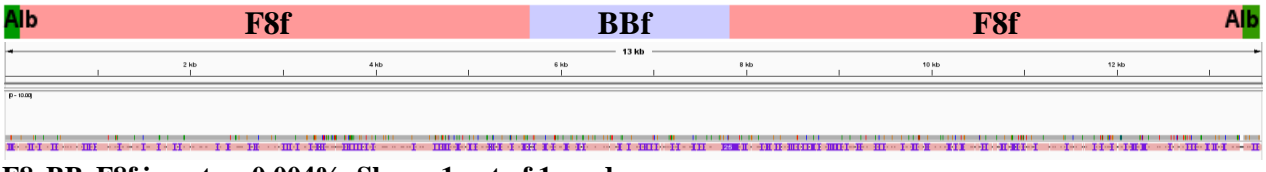

**F8rBBrF8f inserts = 0.004%. Shows 1 out of 1 read.**

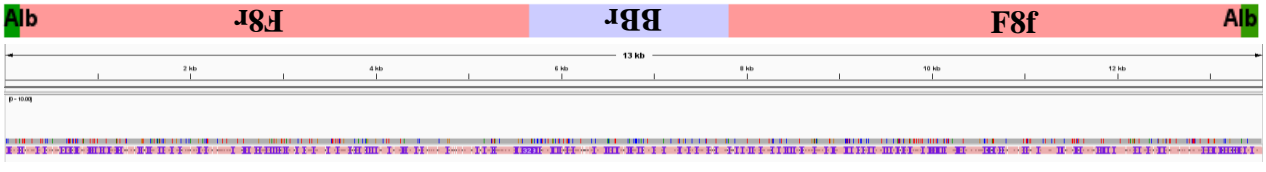

**F8fF8fBBr inserts = 0.03%. Shows 7 out of 7 reads.**

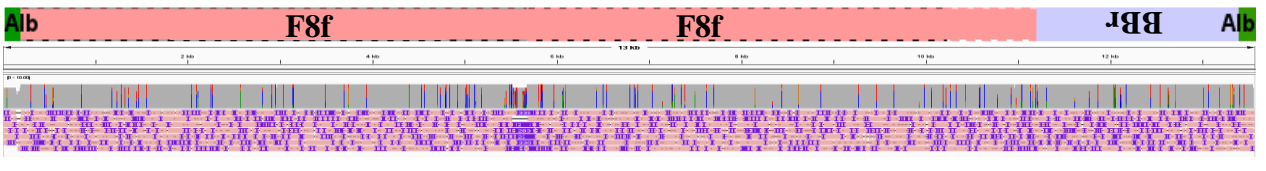

**F8rF8rBBf inserts = 0.01%. Shows 3 out of 3 reads.**

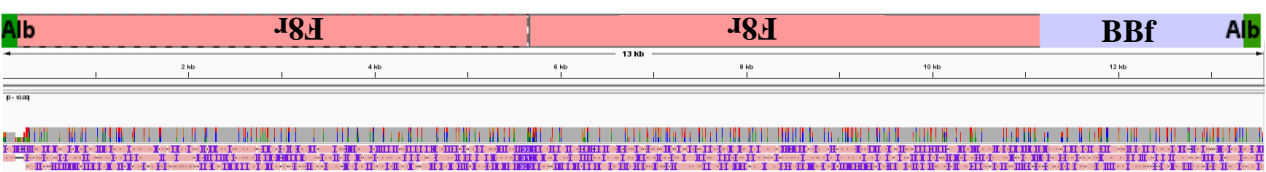

**F8fF8rBBf inserts = 0.01%. Shows 2 out of 2 reads.**

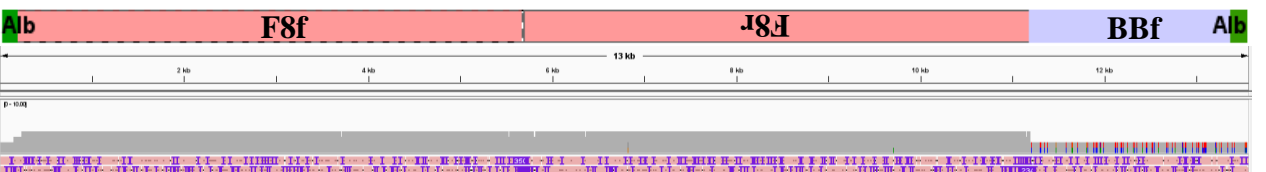

**F8rF8fBBr inserts = 0.004%. Shows 1 out of 1 read.**

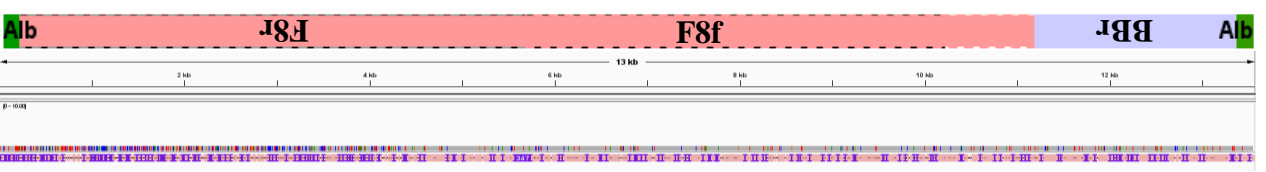

**Figure S6D. Visualization of three-fragment insertions, specifically the insertion of one plasmid backbone fragment and two F8 fragments (continued).**

### E Three-fragment insertions: BB+BB+BB

BBrBBfBBr inserts = 0.01%. Shows 2 out of 2 reads.

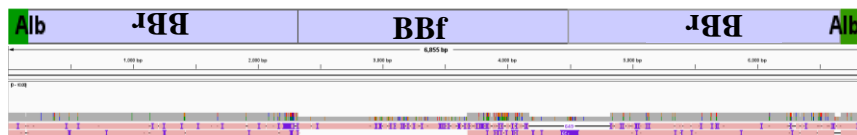

BBrBBfBBf inserts = 0.004%. Shows 1 out of 1 read.

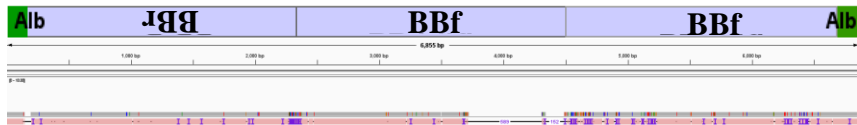

BBrBBrBBr inserts = 0.004%. Shows 1 out of 1 read.

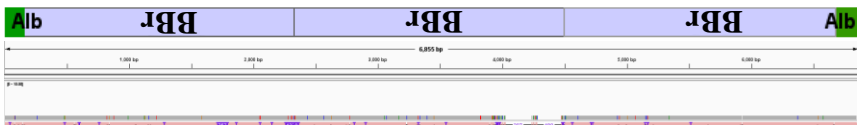

BfBBfBBf inserts = 0.004%. Shows 1 out of 1 read.

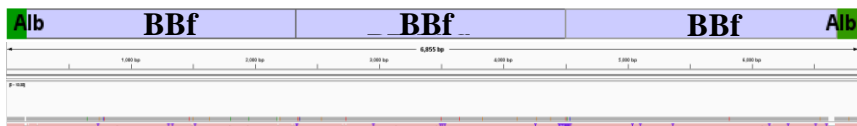

BBfBBfBBr inserts = 0.004%. Shows 1 out of 1 reads.

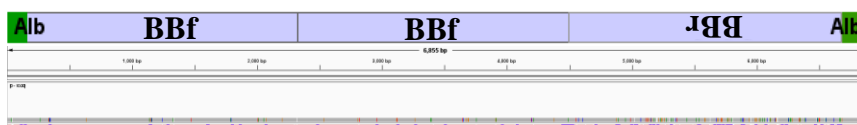

### F Three-fragment insertions: F8+F8+F8

F8rF8rF8r inserts = 0.004%. Shows 1 out of 1 read.

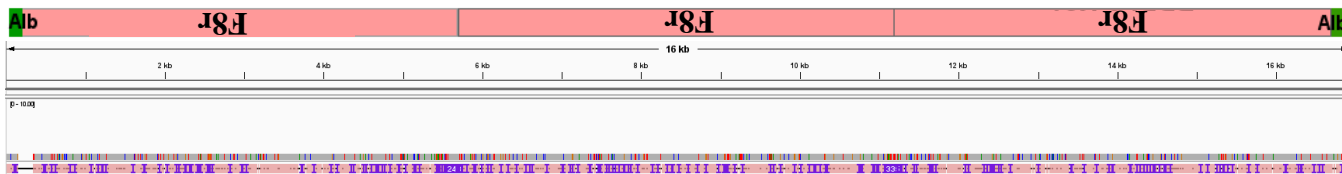

Figure S6EF. The visualization of three-fragment insertions, specifically the insertion of three plasmid backbone fragments (E), and three F8 fragments (F).

### Insertion of pD-BDDF8-sg with HA190-0

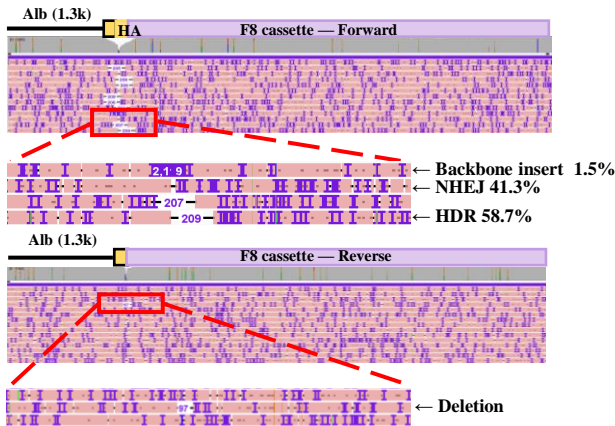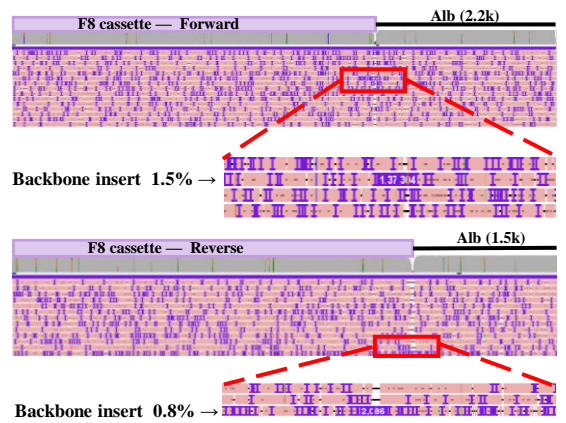

### Insertion of pD-BDDF8-sg with HA85-130

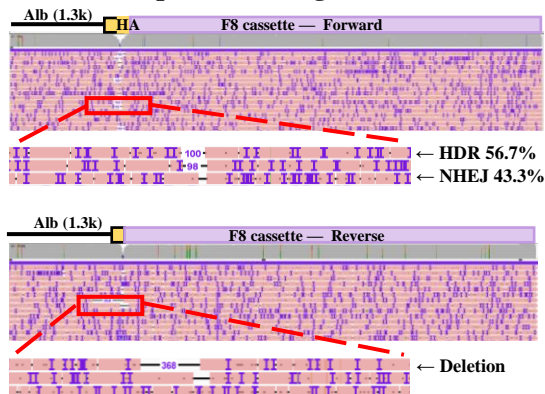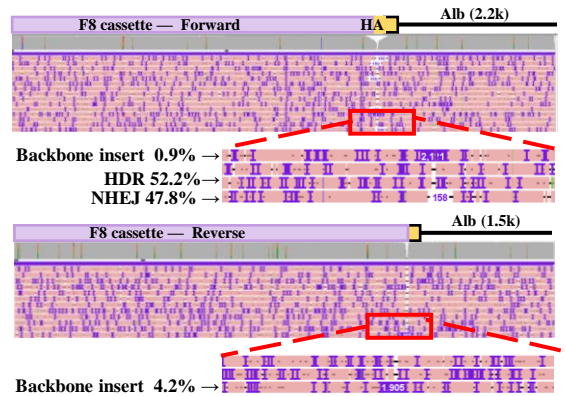

### Insertion of pD-BDDF8-sg with HA85-0

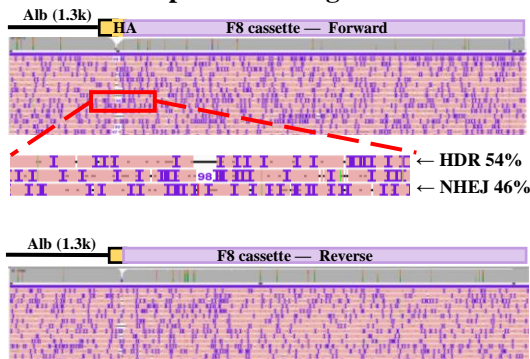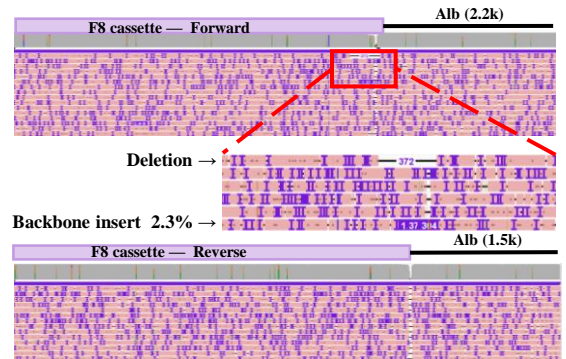

### Insertion of pD-BDDF8-sg with HA600-600

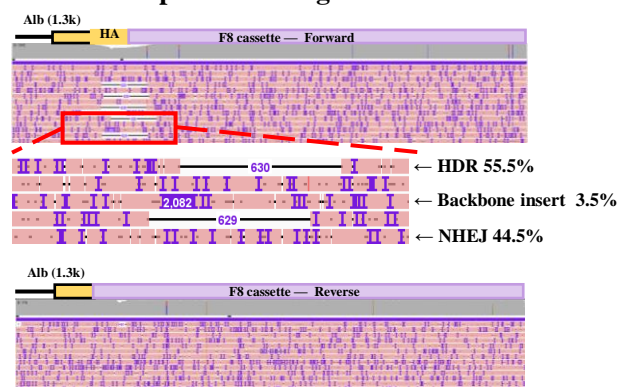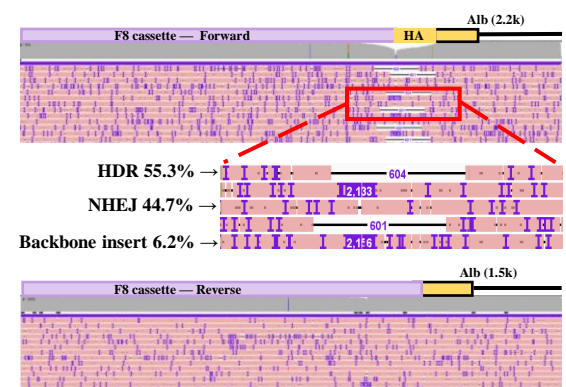

**Figure S7. Visualization of PCR Products from Mouse Liver Edited with Donor Plasmids Featuring Various Homology Arm Lengths.** Integrated Genomics Viewer (IGV) was employed to display the PCR products derived from mouse liver that had been edited using donor plasmids with different lengths of homology arms, specifically HA190-0, HA85-130, HA85-0, and HA600-600. The figure presents alignments of 15 randomly selected reads for each homology arm length.

**A** Length Distribution of Deleted Alb Fragments

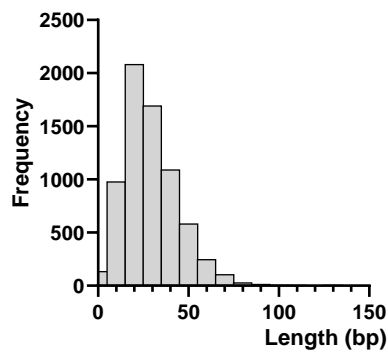

**B** Length Distribution of Deleted F8 Fragments

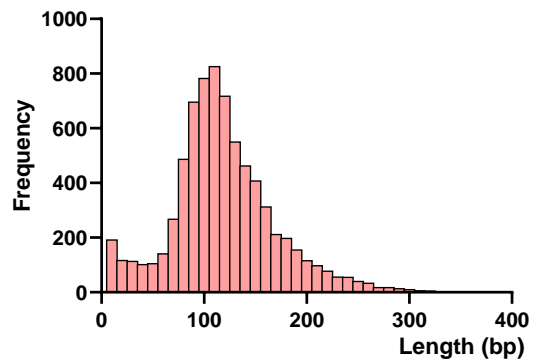

**Figure S8. Analysis of Deletion Length Distribution in Junction PCR of pD-BDDF8-sg Inserts with Homology Arm HA85-0.** (A) Length Distribution of Deleted Alb Fragments: This section presents the distribution of deletion lengths observed in the Alb fragments within the junction PCR of F8 donor inserts that utilized the HA85-0 homology arm. (B) Length Distribution of Deleted F8 Fragments: Here, the focus is on the distribution of deletion lengths found in the F8 fragments within the same junction PCR of F8 donor inserts, again using the HA85-0 homology arm.



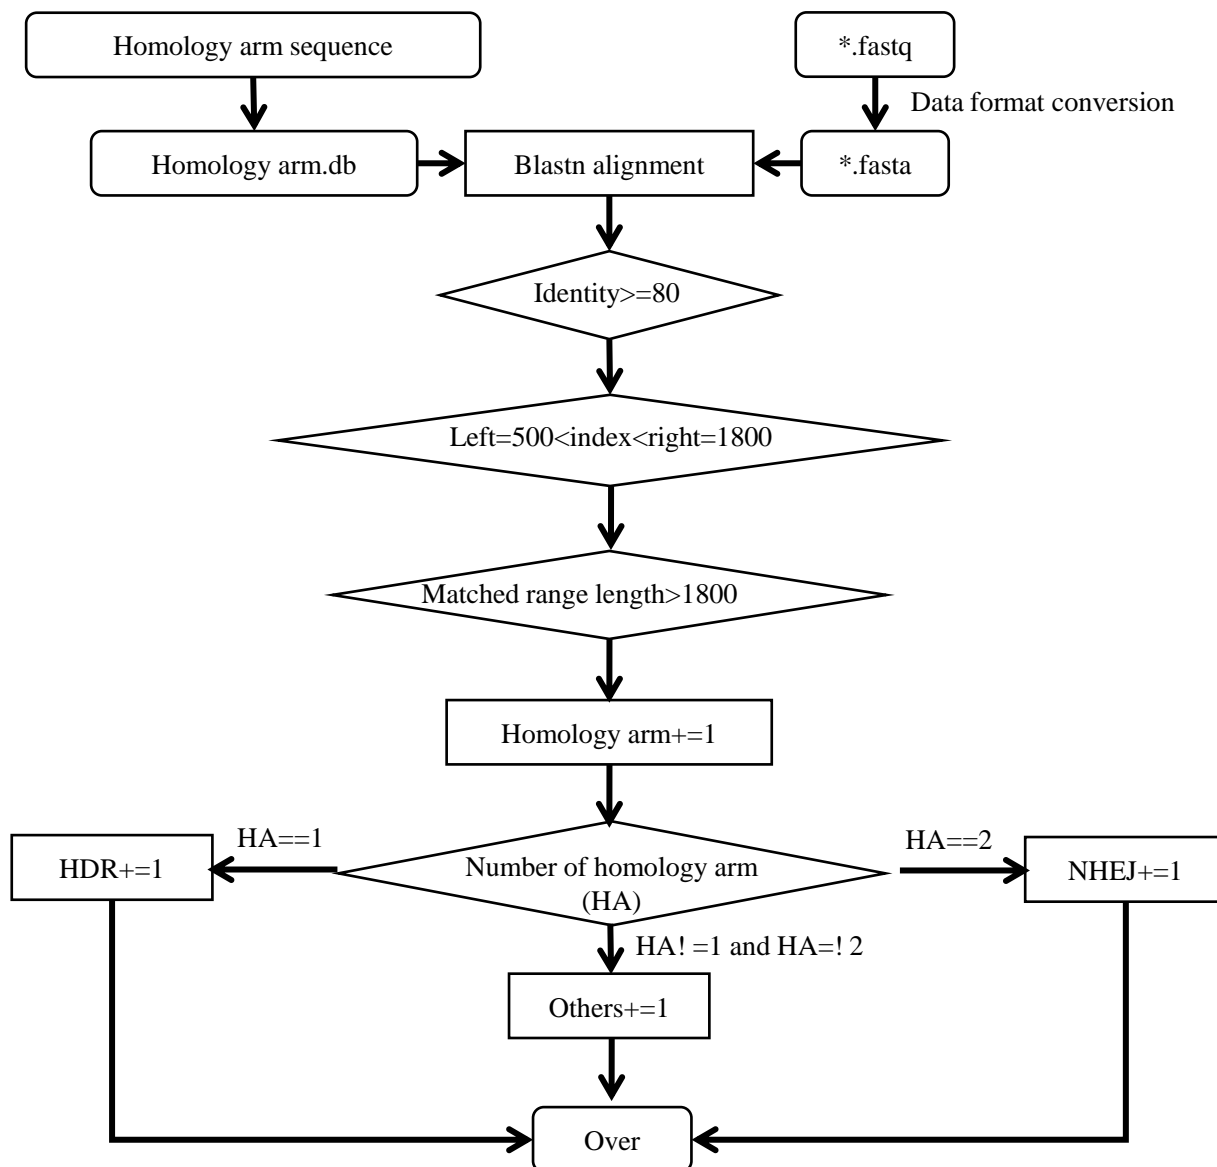

**Figure S9. Workflow for Distinguishing Non-Homologous End Joining (NHEJ) and Homology-Directed Repair (HDR) in Donor Insert Analysis.** This flow chart outlines the data processing steps used to differentiate between NHEJ and HDR events, with a focus on a donor with 600bp homology arms as a case example. The analysis employs the Basic Local Alignment Search Tool (BLAST) to search for corresponding arm sequences and determine the proportion of inserts mediated by each repair pathway. The steps include:

1. Aligning the homology arm sequences with the sequencing file and selecting reads with an identity score of 80 or more.
2. Restricting the range of alignment to ensure the homology arms are located near the target site.
3. Limiting the length of screened reads to exclude artifacts caused by incomplete Nanopore sequencing.
4. Classifying reads that match up to two copies of homology arms as 'NHEJ' and those matching only one homologous arm as 'HDR'. Reads not meeting either condition are categorized as 'Others'.

The reference sequence used in this analysis was generated by directly inserting the donor with homology arms into the cleaved genomic sequence.

## A. Schematic definition of terms used in the data processing

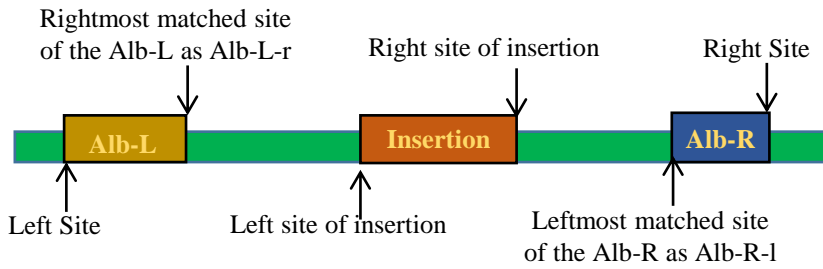

## B. The flow chart for processing data to analyze endogenous genomic DNA insertion

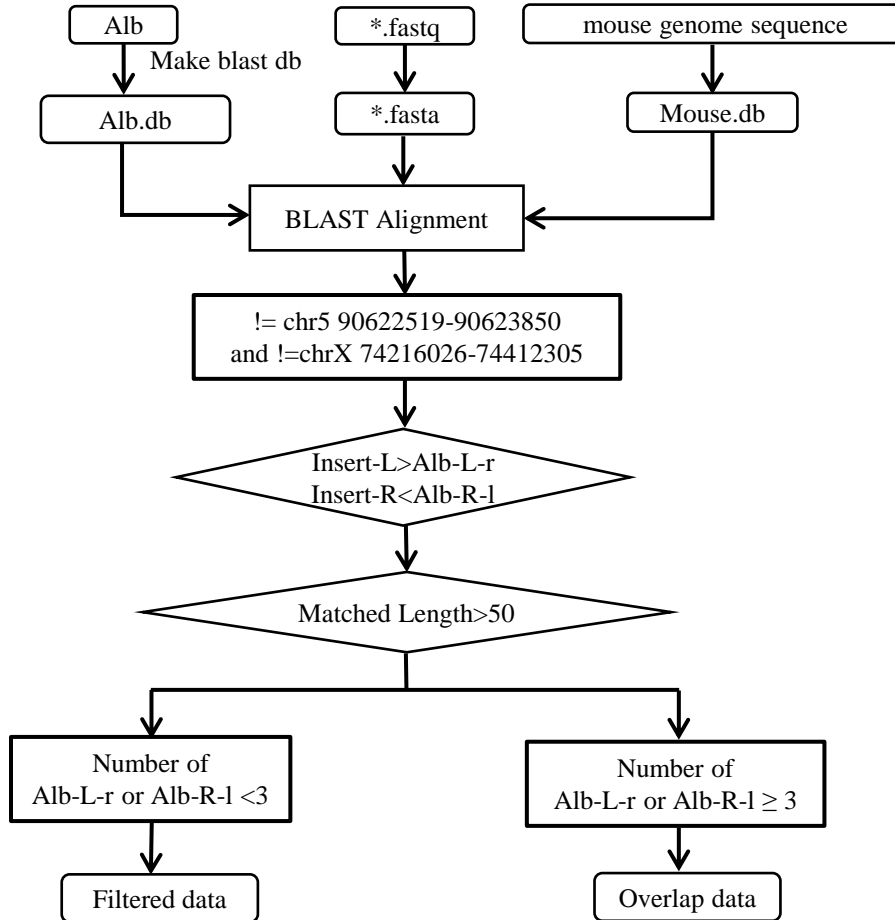

**Figure S10. Data Processing Workflow for Analyzing Endogenous DNA Insertion.** This flow chart describes the steps for processing data to analyze the insertion of endogenous DNA. It includes the following key components:

### A. Definition of Terms:

Alb-L: The upstream homology arm near the cut site.

Alb-R: The downstream homology arm.

Alb-L-r: The rightmost matched site of Alb-L.

Alb-R-l: The leftmost matched site of Alb-R.

### B. Steps for Data Processing:

Generation of database files containing the 332bp homology arm sequence (denoted as Alb), the mouse genome sequence, and the LINE-1 sequence.

Conversion of sequencing data format from \*.fastq to \*.fasta.

Alignment of the sequencing file with the homologous arm sequences and the mouse genome sequence (or the LINE-1 sequence).

Elimination of sequences matching the Alb gene range on chromosome 5 and the F8 gene range on chromosome X.

Limitation of insertions between Alb-L-r and Alb-R-l to ensure endogenous DNA fragments integrate at the target site.

Removal of indexes matched with a length of less than 50bp.

Consideration of occurrences where the number of Alb-L-r or Alb-R-l is greater than three as derived from the same amplicon, counting them as the same type of insertion.



Read #14 Alb-chr3-Alb

TCAATTACGACGAATGCAAGGTAATGTACGTTTACTGTGCATTGCCTATGGCTATGAAGGCAAACTCTAACAGCTCTGGCTAACTCTTCAACATCCATCATTCTTTGGTTTCAGGGTCCAAACC

Read #15 Alb-chr4-Alb

ACACCACAAAGCAATGCAAGGCACTGTAGCTTTACTATGTCTATGGCTATGAAGTGCAACTCTAACAGTCTGGCTAACTTTTTAAACATCCATCATTCTTTGGTTTCAGGGTCCAAACC

Read #16 Alb-chr4-Alb

AATGCAAGGCACTGCTTTACTATGTCTATGGCTATGAAGTGCAACTCTAACAGTCTGGCTAACTCTTCAACATCCATCATTCTTTGGTTTCAGGGTCCAAACC

Read #17 Alb-chr5-Alb

CAGCAATGCAAGGCACTGTAACATTTACTATGTCTATGGCTATGAAGTGCAACTCTAACAGTCTGGCTAACTCTTCAACATCCATCATTCTTTGGTTTCAGGGTCCAAACC

Read #18 Alb-chr6-Alb

AGGCTTCTAGCAATGCAAGGCACTGCTAGCTTTGCCATTCAGGTTTCTTTATGGCTGCGAAGTGCCTAACAGCTCTGGCTAACTCTTCAACATCCATCATTCTTTGGTTTCAGGGTCCAAACC

Read #19 Alb-chr6-Alb

AGGCTTCTAGCAAGGCACTACATTTTACTATGTCTATGGCTATGAAGTGCAACTCTAACAGTCTGGCTAACTTTTTTCAACATCCATGTTCTTTTTTTTTT

Read #20 Alb-chr6-Alb

ATGCAAGGCAAGGTAACGTTTACTATGTCTATGGCTATGAAGTGCAACTCTAACAGTCTGGCTAACTTTTTTCAACATCCATCATTCTTTGGTTTCAGGGTCCAAACC

Read #21 Alb-chr6-Alb

CAATGCAAGGCAAGGTAACGTTTACTATGTCTATGGCTATGGCGCAAACTCCAAAGTCCATAAATCTTTTCAACATCCATCATTCTTTGGTTTCAGGGTCCAAACC

Figure S11A. Single Genomic DNA Fragment Insertion: The displayed read sequences show the insertion of a single piece of genomic DNA fragment at the Alb site (continued).



**Read #35 Alb-chr11-Alb**

GACACGGTAGCAATGCAAGGCAAGTACGTTTACTGCTGTCATGTCATGATATTGCTGCAACTCTTAACAGCTCTGCTAATACCTTTTCTAACATCCATCATTCTTTTGTTCAGGGTCCAAACCTTTGTCACTAGATGCAAGACGT  
CTTAGCCCCAACATTGCAOCAAAGTAGGGAGAATCTCACTTTTTCAAATAAGGAGGCTCATTGAGTGATGTGGCACAATOCCTTTGTTOCCAGCACTCAGGAGGCAGAAGCAAGTGGATCTCTGAGTTTGAGACCAATCTGGTCTATTTAAC  
AAGTTCCAGACCAGCCAAAGTTACATAGTGAGCCTAAACACATCACAACCACAACCTTCTCAGGTAACATACTTGGGACTTAAAAAACATAATCATAATCATTCTTCTCTAAAACGATCAAGACTGATAACCACTTGACAAGGCCATAACA  
GACAAGCAACAGCTGGCACTTTAGGCTTCAAGTATGGTCACTAGTTTGGGTTCCATTTGTAGATAAGAAAC

**Read #36 Alb-chr11-Alb**

CCGTCAAGCAAGCAAGGCAAGTACGTTTACTGCTGTCATGTCATGATATTGCTGCAACTCTTAACAGCTCTGCTAATACCTTTTCTAACATCCATCATTCTTTTGTTCAGGGTCCAAACCTTTGTCACTAGATGCA  
AAGACGAGACCTGCCTGCTCTGCCTCCOGAGTGTGGGTTAATTTTTTTTTTTTTTTTTTTTTCGAGACAGGGTTCTCTGTGTAGCCCTGAGTGTGGGTTAAAGGCATACCTAGTCTGGTCTGAACTTTTTTTTCT  
TTTAAACATGTCTTAAACACATCACAACCACAACCTTCTCAGGTAACATACTTGGGACTTAAAAAACATAATCATAATCATTCTTCTAAAACGATCAAGACCGTGATAACCACTTGACAAGGCCATACAGACAAGCACAGCTGGCACT  
CTTAGGTTCTCAGTATGGTCACTAGTTTGGGTTCCATTTGTAGATAAGAAAC

**Read #37 Alb-chr12-Alb**

AGTCAATGAGCAATGCAAGGCAAGTACGTTTACTATGCTGTCATGTCATGATATTGCTGCAACTCTTAACAGCTCTGCTAATACCTTTTCTAACATCCATCATTCTTTTGTTCAGGGTCCAAACCTTTGTCACTAGATGCA  
AAGACGAGACCTGCCTGCTCTGCCTCCOGAGTGTGGGTTAATTTTTTTTTTTTTTTTTTTTTCGAGACAGGGTTCTCTGTGTAGCCCTGAGTGTGGGTTAAAGGCATACCTAGTCTGGTCTGAACTTTTTTTTCT  
TTTAAACATGTCTTAAACACATCACAACCACAACCTTCTCAGGTAACATACTTGGGACTTAAAAAACATAATCATAATCATTCTTCTAAAACGATCAAGACCGTGATAACCACTTGACAAGGCCATACAGACAAGCACAGCTGGCACT  
TTAGGTTCTCAGTATGGTCACTAGTTTGGGTTCCATTTGTAGATAAGAAAC

**Read #38 Alb-chr14-Alb**

CAATGCAAGGCAAGTACGTTTACTATGCTGTCATGTCATGATATTGCTGCAACTCTTAACAGCTCTGCTAATACCTTTTCTAACATCCATCATTCTTTTGTTCAGGGTCCAAACCTTTGTCACTAGATGCA  
AAGACGAGACCTGCCTGCTCTGCCTCCOGAGTGTGGGTTAATTTTTTTTTTTTTTTTTTTTTCGAGACAGGGTTCTCTGTGTAGCCCTGAGTGTGGGTTAAAGGCATACCTAGTCTGGTCTGAACTTTTTTTTCT  
TTTAAACATGTCTTAAACACATCACAACCACAACCTTCTCAGGTAACATACTTGGGACTTAAAAAACATAATCATAATCATTCTTCTAAAACGATCAAGACCGTGATAACCACTTGACAAGGCCATACAGACAAGCACAGCTGGCACT  
GTTCCATTTGTAGAT

**Read #39 Alb-chr15-Alb**

GCACCTGCAACAGAGGAGCAATGCAAGGCAAGTACGTTTACTATGCTGTCATGTCATGATATTGCTGCAACTCTTAACAGCTCTGCTAATACCTTTTCTAACATCCATCATTCTTTTGTTCAGGGTCCAAACCTTTGTCACTAGA  
TGCAAAGACGCGCTGCTACTTCCCTTTTAAAGTCTAGTATGGTTTTGTTCAATTCATCACCTGTTGGATGTGCTTTCCTGTTTTTTCTTTAAGGACTTCACTCTGTTGATTGTTTCTTTTTCTTTAAGGACTTGAACCTAAACA  
CATCACAACCACAACCTTCTCAGGTAACATACTTGGGACTTAAAAAACATAATCATAATCATTCTTCCCTAAAACGATCAAGACTGATAACCACTTGACAAGGCCATACAGACAAGCACAGCTGGCACTCTTAGGTTCTCAGATGTGGTC  
ATCAGTTTGGGTTCCATTTGTAGATAAGAAACTGAGGTGC

**Read #40 Alb-chr16-Alb**

ACTAGACCAGCAATGCAAGGCAAGTACGTTTACTATGCTGTCATGTCATGATATTGCTGCAACTCTTAACAGCTCTGCTAATACCTTTTCTAACATCCATCATTCTTTTGTTCAGGGTCCAAACCTTTGTCACTAGATGCA  
AAGACGAGACCTGCCTGCTCTGCCTCCOGAGTGTGGGTTAATTTTTTTTTTTTTTTTTTTTTCGAGACAGGGTTCTCTGTGTAGCCCTGAGTGTGGGTTAAAGGCATACCTAGTCTGGTCTGAACTTTTTTTTCT  
TTTAAACATGTCTTAAACACATCACAACCACAACCTTCTCAGGTAACATACTTGGGACTTAAAAAACATAATCATAATCATTCTTCTAAAACGATCAAGACTGATAACCACTTGACAAGGCCATACAGACAAGCACAGCTGGCACT  
TGTGTCATCAGTTTGGTTCATTTGTAGATAAGAAACTGAGC

**Read #41 Alb-chrX-Alb**

GCACCTCAGGCTCTAGCAATGCAAGGCAAGTACGTTTACTATGCTGTCATGTCATGATATTGCTGCAACTCTTAACAGCTCTGCTAATACCTTTTCTAACATCCATCATTCTTTTGTTCAGGGTCCAAACCTTTGTCACTAGATGCA  
AAGACGAGACCTGCCTGCTCTGCCTCCOGAGTGTGGGTTAATTTTTTTTTTTTTTTTTTTTTCGAGACAGGGTTCTCTGTGTAGCCCTGAGTGTGGGTTAAAGGCATACCTAGTCTGGTCTGAACTTTTTTTTCT  
TTTAAACATGTCTTAAACACATCACAACCACAACCTTCTCAGGTAACATACTTGGGACTTAAAAAACATAATCATAATCATTCTTCTAAAACGATCAAGACTGATAACCACTTGACAAGGCCATACAGACAAGCACAGCTGGCACT  
AAGCACAGCTGGCACTTTAGGTTCTCAGTATGGTCACTAGTTTGGGTTCCATTTGTAGATAAGAAACTGAGGTGC

**Figure S11A. Single Genomic DNA Fragment Insertion:** The displayed read sequences show the insertion of a single piece of genomic DNA fragment at the Alb site (continued).

**Read #42 Alb-chr10-chr3-Alb**

CCAAATGCAAGCAATGCAAGGCACGTACGTTTACTATGTCATTGCCTGTGGCTGTGAAGTGCAAATCAACAGCTCTGCTAATACTTTTCTAACATCCATCATTCTTTGTTTCAGGGTCCAAACCTGTCACTAGATGCAAAAGCGCCT  
AGCATCCGCTGACCATCTTTGAACTCAGATAATCACAGCCAGGATGACTCTCAGGGTGTCTCTCCATCCAGTGTGGCCAGAGTGTGTCAGAAAGGTGGACTCAAAGCAAAAGGAGGATCATACCACTGAGTGTCTCCAGGATTTT  
AGGCTAGTAAAAAACAACAACTAAATAGTAAATAACCTAATGATGTAGCAGAGGAGCTAGATGCACAGAGAGGGGAGAGTCTCGGGTCAAGGCAATAATCTCTAGATGAGATTTTACCTAGCAGAAAGGAGTCTTAAACCATC  
CAACACCAACCTCTCAGGTAACATACTTGGGACTTAAAAACATAATCATATCATTTTTCTTAAACGATCAAGACTGATAACCAATTTGCAAAAGAGCCATACAGACAAGCAGCAGCTGCACTCTGGAGTCTTCAGCTATGTCAT  
CAGTTTGGGTCATTTGTA

**Read #43 Alb-chr2-chr9-chr13-Alb**

GCACACTAGCAATGCAAGGCACGTACGTTTACTATGTCATTGCCTATGAGTGCAGAAATCCACAGCTCTGCCAATCTTTCTAACATCCATCATTCTTTGTTTCAGGGTCCAAACCTGTCACTAGATGCAAAAGCGCCT  
TAGCTTGCCTGAGAAAAGGAAAGCAAGAGGAGATGATGAATGCCATGGCATGAGTGTCAAGGTCACACAAAACACATCTCTGCTCTATTACATGGATCCCAATGTGAACCTTAGGTCCTCAGGCTGGCAGAAAACAATGCT  
TCCTCTGGCATCTCACCAGCACAACATTTAAACATGTAAGAGAGGGATTGCCAAATATCAACAAAGAAAGAGGAGGCTCAAGGGAGGGAAAGAGCCTGGGGCTCTCTGAAGGTCAGTGCAATCTTTACAGCTTTGGAACCAATGGTCCAG  
TGCCCTCTCACCACCAATATTTCTCTGTTATGACCAGAAATGTTCTCAGATGCTACCAAGCTTAAGGAGCTCTCTTTGTCAGACAGCAGCAGGCGGAATACTACAGGACTCTTTGCTGTCTGGCTCTTTATCACACTACATGTTCTC  
TAGAAGCAGAAAATGTAATTTCTTTTTTTTTTTTTTTTTTTTTTTTTTTTTTAAACCTAAACAGACTCAACCAACCTTCAGGTAACATACTCTGGGGGGGGACTTTAAAAACATAATCATATCATTTTTCTTAAACGATCA  
AGACTGATAACCAATTTGACAAGAGCCATACAGACAAGCAGCAGCTGGCCTCTTAGGCTTCCAGTATGGTCATCAGTTTGGGTCATTTGTAGATAAGAACT

**Read #44 Alb-chr5-chr1-chr2-chr8-Alb**

GCACCTGTAGTCAATGAGCAATGCAAGGCACGTATGCTTTACTATGTCATTGCCTATGAGTGCAGAAATCCCAACAGTCTGCTAATACTTTTCTAACATCCATCATTCTTTGTTTCAGGGTCCAAACCTGTCACTAGATGC  
AAAGAGCGCTTAAACACCGTGGATCTATGTCACAGTGTGTGTTACTATGCACTGAAGATTCTGGCTTAGTACAAGCAGTAGAGGTAATCTAGAATATAGATACTTTCTGGACAACCATACTAGGAACAGCGCAAAGTAAATGCTA  
TGCTATAAACATGCACCAATTTAAATCTGAGTGGGAGCATCTGGCAAGTACTGACTTATAAGTTTATAAGGAGACTGTTCACCTTGCCTCTAAGTAGGTAATGTATAATTAATTTACAAAATGACTTGGAGAAACCCAAAGCA  
AAGGAATGTAATAGTTTTATGAAAAAATAAATCTAGAAATTTTACAGTGTGCATGTCCAAATAGGTCACCCATGTTTACACATAAATGCAATAAAAAAGAAAATCACTGCTACTGTTTCCTAGTAATCAATAAATGACTC  
TAGAGATTTAAACAATTTCAAGTTAAACAAAGTATAGGTGATAGGTTTCAAATTTGCCAAGGAACTACTATGTAACATTTCTCTATGTAACATACAGACATAAGACAGTGCATCTGCTGAGGCTCTGCTTGAGTACTGCATAC  
ATAATTTGGCAGGCTGCTTTGCTCCAAGTACCGCAGTGGAGCTGCAAAATGAAAGGAAAGTGCCTGCAACAGGGGAAATGTATTGAGCAGTATTAATAAAAAAGAGGAAATGGTTTAGGAGAAAATGTCACAACTTCACTCTGGAC  
TATGTTGCAAACTAGCTCTCAAGTCAGTACCTAAATCTGTTCTTATGCTGTTCATCAACCCCTTCTGACTGAACTATCAAGCTGCTGCTGCTCTATTTTAAATGTTTCTGAAAAAATAGGACAGCAGTTTAACTTAGCC  
ACAAAAGTTGAAGCAACATTAATTTAAAAAATAATGTTCACTAACAGAAATGCACGGTGGGTTCTCTTCAAGCAGCTACTGTTGTTTTCTGTAATCCATAGTCTCTACACCTTACTCTAAGGCAGATCCAAATGCTGTGCTGG  
CCAGCCTGTCACCAAGTTTATACAGAAATGATGCAATACTGGAGTATGAATGACTAATTTAAACAGTGGAAAACTCTAATAAAGAACCCAAATCTGCAAGATCTAAGCAGATAGGTTTTCTGTAAGAAAATAATGAAAG  
CTATGCTTTTGATATCCTAATGACTATTTTTAAATAAAAATAGGCTTAGATTTAAATTACTGAATAATTTAAATCAAACTCTGCACTCTCTTTTCCCTACTGTTTCTATATTTGATGTGCCATAAAGGCTCAGCTCATATGT  
CTACTTTATTTGGGGTTTTAGACTTAGAACCATAACTATACATTTTTCTTTATGAATTACTTACATCTGGTTTTGGTTATAACAGCAGAAAAATGAGTAAGACTGCCATAATAGGTTTACTGCTGTGAACAGATACCAAGCAAA  
GGCAAGTCTTATGATGAAAACAAATTTAAATTTGGGGTACTGACAGGTTGAGAGGTTGAGTCCATATCATCAAGTGGGAAACATGGCAGTATCCAGGACAGCAGAGCTGAGAGTCTATATCTTCAACAAAGGCTGCTAGGGGAGAAGA  
CTGACTTCAAGGCACCCAGGGGGCCCAAGCCACACCCAGTGCACACCTACTCCAAGTGTCAACCTATTTCCAACAGGGCCACCTCCGGGAGCCACTCCCTGGGTCOAAGAAATCCCTTAAACCATCACAAAGCAAAATC  
TATTTATGTTAGCTTACCACATAGTATGTTCTGAGGAAATAACTCTCTGCTCAACATGTGCAAAAGATGCTATATTAACAAAGGTTGACAGAGTCCATCTGATCAAGGGGATCAAAAATGGAAGGGAGTGGGAAGTCA  
AAATATCACTTTTTCAGATGATATGATAGTATATATAAGTGAOCCTAAAAATTCACAGAGAACTCTTAAAAOCCATAAAACAGTTTGGGCAGTAGCTGGACATAAAAATAACTCAAACAAGTCCAGTCTCTTTCTCTCTTTTTTTTT  
TTTACAAAAGATAAACAGGCTGAGAAAAGAAATTAGGGAACAACACCCCTCTCAATAGTCACAAAATAATGTCATCTTACTGACTTCTAACTACAAAAGTGAAGACTCTGTATGATAATAATCTCAAGTCTCTGAAGAAAAGAAATAAA  
GAAGATCTCAGAGGACACATCTCCATGCTCAAGTATTGGCAGATCAATAAGCAAAAATGGCTATCTTCCAAAAGCAATCTACAGATTCATGACACACCCATCAAATTTCAACTCAATCTTCAACAAATGAAAGGAGCAATTTGC  
AAATTCATCTAGAATAACAAAAAACCTAGGATACAAAACCTCTCTCTCAAGGATAAAAGAACTCTGGTGAATCACCATGCTGCACTAAAGTTTATTACAGAGCAATTTGGTAAAAAAGTGCATGGTACTGGTATAGAGACAGACAAG  
TAGACCAATGGAATAGAATGGAAGCCGAAATGAAACCCACACCTATGTCATGATCTTCAGACAAGGAGCTAAACCCATCCAAATGAAAGAAAGACAGCATGCAACAAATGGTCTGTAACAACTGGTGTATCATGCAAGAAG  
ATGOGGATCGATCCATCTCTCTGACTAAGGTCAAATCTAAATGGATCAAAGAACTTCACATAAAACAGAGACACTGAAACTTATGAGAAAGTGGGGAAAAAGCTGAAGATATGGGCATCAAGAAATCATGCAACCTCAGG  
CAACTATCTGGGACTAAAAACATGATCATAAATCATTTTTCTTAAACGATCAAGACTCAACCAATTTGACAAGAGCCATACAGACAAGCAGCAGTTGGCCTCTCTGAAGCCTCAAGTATGTCATCAGTTTGGGTCATTTGCGAGATA  
AGAACTCAGGTGCTC

**Figure S11B. Multiple Genomic DNA Fragments Insertion:** The illustrated read sequences demonstrate the insertion of multiple pieces of genomic DNA fragments at the Alb site.





Read #49 Alb-F8-chr7-Alb

TCAATGAGCAATGCAAGGCACGTACGTTACCGGATGTGTCATTGGCTATGAAGTGCAAATCTGGAGACGCTCTGCTAAGACTTTTCAACATCCATCAITTTTGTGTTTCAGGGTCCAAAACCTTGTCAGTATAGGTTTCATC  
TGTTGATGGCCAGATAAATTTGGTCTTTGTACTCTTACCAGTTGGCAGGGCCATTTGTTCAAAATTTGACTTTTCAAACTCTGTCATGGGGTGGGCACTAAGGAGCATACCAGTCTCTCTCAGCAGCAATGTAATGTACCAAGTT  
TTAGGATGCTCTTTGGCACTGAGCGAATTTGATAAAGGAAGGAGGTTGTCATCATCAAACCTGACCACATCCATTTACAGAACTAGTAAGATCATCATAGTCTTCGCTTTTCATCATCTGCTAGTTGGGGTTCTTTGGA  
CAGCTGTTGACTTTGCATAAATCCATGCTCATGTTGGTGGGAAGATAATGACAAAACAGTAGAACTGTGAGGTGTCATCAAGAGTGGTGGAGCATAGGAAGTTATGGCGAGATTTCCAAAGGACGCTGGCGATGGTCTCA  
GCACAAGAGTGGCCACTTCCAGGAATATTGAGTGCACTTCAGGAAGCGGTGCCCATTCATCAGATGCCAATAGACTGATTTCTGTGGCATCCAACTCAGACTGGCAGAGAACTGTTTACATAACCAATTTGATGGTGGATTCAGGC  
CAGGCCCTGGAGAGATGCAGATCCCATCTGCATCAAGGAGTTCTTTGTTCTGAGTGCCAACTTTCTTTCATCAAATAACAGAAAAGTAGTATAAATTTGTGCAAAAGTCTGTGCCCTTTCTGGCCAACTCTCTCTCACATA  
CGAATAGGGCTCCACCAGCAATTCAGTCTTTTACCAGTTGCACATGAGAAAGATATGAAGTAGGAAGGCACAGTGGTCCAGAGCCATTTGGACATTTCTTCCAGGACTGGCAGACATATGATGGCTTCCACAGGGAAGACTTTA  
TCAATCTCTTTCTCCCTTTGACTGGTGTGATCATCATATTTCAAGCTCCTCAGAAAGCTTTCCAGTAGGAACAGACACCAACAGCATGAAGACTGACAGGACGGGAAGCCATGTTCTTAGTAAATTAACACTGTATATAAACCAGCTGGA  
TGTAGGACTAGCAGACCCATCCAGGGTGGCTGGCTGAGTGTCTTAAGTGTACCGTAAACCACAAACAGAGTCTTTTGTACAGACTGAGGTGTTGAATGAAAGATTTTGTACTTAGGAGGAAATCTTGGCTCCACAGGCAGCT  
CACCGAGTACTTTGACATAGTCCCACTACAGTCCACTGCACCCAGGTAGTATTTAGAAGAGGCTGGCTATGTACAGAGCTACCCATTCACCCCTTCTCAGAGAGCTCAAGTGTTCGGTAACTCTGTTTCACTTTTGTGATTT  
GTTGTTGTTAGACAGATCAAGCATTCAGGTACTGCAGACTCCCGCTCAGGATCTGGGTAGCTGGAATTAAGTGTGCATAGCAAGTCTATGTTGCCATATATAAAGTAAAAATACAAATGGAAAATCAAAAAGGTGATTA  
TGACTTGCACCAACATATTAGTCAATGCAAAAGCAAGCCATCTCAGGTTAGCAACTCCAAAATCTGGCCCTCTGGCCAGCTCAGATGCTCTTTGAGTCAGATGCTCTGGCCAGGGTGGTACATTTCTCAGTATGAATGAATCTAATG  
ATATTAATTTATATAGCAATATAAACAATGGGGTTAAGATGTACATAGTACAGCTGCAAGTACACACACTTGAACACACATGCACATGCACACATAACAGGATACTCAATAAAAACTGGAAAGTCAACAAAATTTTTTCACTGTTA  
TCACTACTTATATTCAGATAGCTAATCTATGTTATGTTCTAAACAGACACTTAGAATGGGTGGCTCAGATGCAAGCTGGAAGTGAAGCAATATATAGACAAATTCACATTTGAGAGTCATGAGATGGTAACTTTTCAATTA  
TAAATTTGGATGAACACATCACTAATTTGAAACAATCTTTCTCCAGTACTATACTGGGACTTAAAAACATAATCATATATTTTTCTAAAACCATCAAGACTGATAAOCATTTGCAAGAGCCATACAGACAAGCACAGCT  
TACTTTAGGCTCCAGTATGCTATCAGTTTGAATTTCAATTTGTAGATAAGAAAAC

Figure S11D. F8 and Genomic DNA Fragments Insertion: The depicted read sequence showcases the insertion of both F8 and genomic DNA fragments at the Alb site.

Read #50 Alb-F8-chr3-BB-Alb

GAATCAGGCAGCAATGCAAGGCACATGGTTTTACTATGCTATTGGCTATGATACAAAATCTAACAGTCTGCTAATACTTTTCAACATCCATCGTTTCTTTGTTTTCCAGAGGGTCCAAAACCTTGTCAGTATGCAAAAGCGC  
CGGGAGCTGCATGTGTCAGAGAGTTTTCTACGTCATCTTGAACACTTGCACAGGGCAATAGGATCATATAACAGOCATACCACATTTGTAGAGGTTTTGCCCCCTTTTAAAGCCTCCACCTCCCTGAACTGGAAACATAAAATGAA  
TGCAATTTGTTATTTGTTAACTTTGTTGCGAGCTTATAATGGTTACAAAATAAAGCAATAGGCATGCAAAATTCACAAAATAAAGCATTTTTCTGCAATCTAGTTGTGGTTTTGCOCAACTCATAGTATCTTATCATGTCTGGATCCGC  
CCAAAAGGAGATCCGACTCGTCTGAGGAGGCAAGGCGAGACGGGAGGCGGAGGCGGAGCAGGCGGGAAGGAAAGGTCGCTGGATTTGGGGGCGGAAGGGACGTAGCAGAGAACTCCACGAGAAATCCAGGTGGCAAC  
ACGGGGGAGCAGOCATGGAAGGACGTTGGCTTCCGCAACAACAGCTGTCAAGTGCACACAGCTGAGCCCTGTCCAGCAGCGGGCAAGGGGAAAGGATAGCGGAAGGTTCCGCGCTGGCAATAGGGAGGGGGAAAGCGAAATGCC  
GGAAAGGAGCTGACAGGTGGTGGCAATGTTCCAAACAGTGGGTTGCGTCAGCAAAACAGCTGCACACGCGCTTACCCTGACAAAGGGGCTAGCTCCCTCATAAAGAGACAGCAACAGGATTTATCAAGGAGGAGAAAATGAAAGCCA  
TACAAGGAAGCAATAGCATGATCAAAAGGCAATGAAAGCAGGATACCGGTAAAAAGGAGCAACATAGTTAAGAAATACCAAGTCAATCTTTCAAAAATTTGTAATCAGAGGTTGATTTGCGAGCTTTAACTCAGTAGACTCTGACT  
TGCGGGCCGAAACCTCCATCTCAGGGCAATCTGGTGCACCCAACTCTGGGAGGTGAATTCAGGTAGCAGGTGATGAAAGGTTGAGGAGTTCACCAAGCTGTGAAGGACTCTGATTTCCCTGAAAACCTTTACTTTTGCATTT  
CTGAAAAGAGAGTCCACTGATAATACATCTTACTGCTGGAGATGAAACTCTTACATACATGCTGGTAAGCAGAGATTTTACTCTAGTGTACTCTCTGACTTTCAATGTCTCTGGAAGTCCACTGACGCACTCTTTTGGAA  
TTATTCACCTGGGAGCTCAGGCTTTTACTCTCCCTGGAGGTGAAAGTCAAGGCTTTTGAAGGAGACAGGTTGGCAACATGTGGTAAAAATGGGGATGAAGCAGTAACTGTGTCATCTGATATTTGCTTACTCTCCATTTCCAAATG  
GCATGCTGCAGCTATTTAAATCAGAGCCATCACTCCATGCGAAGAGTCTGCAGATATATAATGAGTTAGGTGCAAAACGGAATGATCGAGCAATAATGGAGGTTAAAAATATTGTTTTTATCCAGATGAATCCACATGGCCAAAG  
AAGACCAATTAAGTTCCAGTGAATTTCTCGATAAGTCTGCACCTTCTCCATCAAGACTATACATGATAAATCAGAGATGTAGAGGCTGGAGAACTTTCAGCAGACACCCCTGGCTTGTATGCGGTGAATTAATCTTTGGTGCACAC  
AAGATCCACTTGTATCAAGAAAAGGGCTCCTGTACTCCAGGCAATGATGATCCGGAATAATGAAGTCTGGCCAACTTTGGGGCCACTGCTCAATTTGCTCGAAGCTGTAATCTGAGGAAATCTCATGTGTGCAAGCCATTTCCAG  
GGGAGTCTGACACTTATTGCTGTACACGAGAAAAGTGTACTCATCCAGCATGTAGATGCTCGCAATGAGCAATCCACCCATGAAAATTCAGGCTTTGGATGGTAACATCCACTGTCTCAAAAACACTGGATAGAGATTTGACAGTG  
CCATTTTATACCTCTTTTTTTTGGTACAGTGAACACATGCTCCATGAAATGAATAGATGGATGTTTTTCAATTTGCTGCCACTGTGAGCAGATACCATGAAATCTTTGATCTGAGCCATTAAGCCAGGTAGTGTATCCATTAATG  
TAGCCATTGATGGATGGAAGGCGATAATCTCTTTAAAAAGTGGGATCTCCATCTGGATATTGACAGGGAAGTCTTAAAGAAAGAAACACACACACACATACACATACACACACACAAAAGAACCAACACAAAAA  
ACCTTAAAAATTTGCAAGAAAACACAAAACAGGCTAGTAAATTTGAATAAAAACATCCAAAGACCTAAAAAGGAAATGAAACATAAATGAAACCCAGAGAGCAACTCTGGAAATGAAACCCAGAGAGGAAATCCAGGAAACATAGT  
GCAGCATCAGCAACAGAAAACAGAGATGAAAGAGAAATCTCAGTACAGGAGAAATGCGAGGGCCAAAGTCTCTCCCGCGCTTACCGGATTTCAATTAATGAGCTGGCAGCAGCTTCCGAACTGGAAGCAGACGCTAGGC  
ACGCAAGCAATTAAGTGGTGTAGCTCACTCAATAGCCACCCAGGCTTTACACTTATGCTTCCGGCTGTATGTTGGAGATTTGAGCGGATAACAAATTTCCACACAGGTGATGAGGATGCAACTATTTTATCACAACCCACAA  
CCTTCTCAGGTAATCTACTTGGGACTTAAAAACATAATCATATATTTTTCTCCAAACGATCAGACTGATAAOCATTTGCAAGAGCCATGAAACCAAGCACAGCTGGCCTCTAGGCTTCCAGTATGCTCATGGTTTGGTTGCCA  
TTTTG

Figure S11E. F8, Plasmid Backbone, and Genomic DNA Fragments Insertion: The exhibited read sequence displays the insertion of F8, plasmid backbone, and genomic DNA fragments at the Alb site

cgactcgagactcgagccccgggtactctgccagcagagcttgcaccaaccccgaagggtccacacgggactccccagggaccctaagacctctggtgagtgatcacagtgcc  
tgccccaatccaatcgcgcggaacttgagactcgggtacataggaagcaggctaccgggctgatctggggcacaagtccctccgctcgactcgwgactcgagccccgggctacc  
ttgccagcagagcttgcaccaaccccgaagggtccacacgggactccccagggaccctaagacctctggtgagtgatcacagtgctgccccaatccaatcgcgcggaactyga  
gactcgggtacataggaagcaggctaccgggctgatctggggcacaagtccctccgctcgactcgagactcgagccccgggctactctgmcagcagagcttgcaccaacccc  
gcaagggcccaacacgggactccccacgggaccctaagaacctctggtgagtggaacacagcgctaccctaatccaatcgctgggaacttgagactcggtacataggaagcaggct  
accgggcttgatctggggcacaaccccttccactcactcgagccccgggtactcttgcagctgagtcgctgacacccgcaagggtccacacaggtatccacacgtgactctaaga  
cctctagtgagtggaacacaacttctccaggagctgggtcgaacaccagatctgggtactccttgcagaagagagcttgcctgcagagaatactctgcccactgaaactaag  
gagagtgctaccctcaggctgctcatagaggctaacagagtcacctgaaagaacaagctcttaacagtgacaactaaaaagctagcttcagagattaccagatggcgaaggcaca  
acgtaagaatcctactaacagaatcaagaccactcacatcatcagaacgcagcactccccccacttagcttgggcacccccacacacgaaatctagaccagatttaaaa  
acatttctgatgatgatagaggacatcaagaaggactttcataagctcaatcaagatttacaggagagcactgctaaaggttacaggctcttaagaaaaagcaggaaaaacaca  
gccccaacagggtgatgaaatgaacaaaaccataactagaactaaaagggaagttagacacaataaagaaaaacccaagcaggcaacgctggagatagaacccctaggaaagag  
atctggaacatagatcgagatcagcaacagaatacaagaatggaagagagaatctcagggtcagaagattccatagagaacatcgacacaacagtcagaagaaaaacaaaa  
tgcaaaaggatcctaactcaaacatccagtaattccaggacacaatgagaagcacaacactcggataataggaattgatgagaatgaagatttcaactaaaggccagctaat  
atcttcaaaaaataatagaagaaacttccaaacataaaaaagagatgccatgatcacaagaagcatacagaactcaaatagctggaccagaaaaagaattctccccg  
acacataataatcagaacaacaaatgcactaataaagatagaatattaaaagcagtaaggagaaagggtcaagtaacatataaaggaaggcctatcagaattaccagcagctttt  
caccagagactatgaaagccagaagcctggacagatggtatagacactaagagaacacaatgccagccccgggtactataccggcacaacttcaattaccatagatggag  
aaaccaagatttccacgacaaaacaaagttcacacaatatttccacgaatccagccttcaaaggataataacagaaaaagaagcaatacaaggacggaatcacgcctagaac  
aaccaagaaatgatcattcaacaaaacaaaagaagacagccacaagaacagaatgccaacttaacaacaaaaaaaaggaggacaacattcttcttaataatctttaa  
atcaatggactcaattccccaaaaaagacatagactaacagactggctcacaacacgggaccacattctgctgttacaggaacccatccagggaaaaagacagacactac  
ctcagatgaaaggtcggaaaaacaaatttccaagaatggactgaagaacaagctggagtgccatttaatatcggaataaatcgacttcaacccccaaaggttatcaaaaagac  
aaggaggacacttcatactcaaaaggttaaaactcctcaagaggaaactcctaattctgaatctcagcacaacaaatgaaggcagccacattcattagacacttttagtaagct  
caaagcatacattgcacctcacacaataatagtgaggactcaacacaccatttctcaaaggacagatcgtggaacagaaactaaacagggacacagtgaaactaacagaagt  
tatgaacaaatggactgacagatctacagaacattttctcaaaaaaaaaggatataccttctcagcactcacgggacttctcaaaattgaccataaattggtcaca  
aacaggcctcaatagatacaaaaatgtgaattgtccatgtatctcatcagaccactggcctaagactgatcttcaataacaacataaataatggaagccaacattcagctgga  
aactgaaataactcttcaatgatcctgttcaaggaaggaataaagaagaaatgaagacttttagagtttaagaaaatgaagccacaacgctaccacaaactatgggacac  
aatgaaagcatttcaaggggaaactcagcctgagtgctccaagaagaacggggagacagcacaactagcagcttgacaacacatcaaaagccctagaaaaaaaggaa  
gcaaatccccaagaggtagcagcgggaaataatcaaaactcagggtgaaatcaacaaagggaacaagaagaactattcaagaatcaacaaacagaggagtggttctt  
tgaaaaatcaacagatagataaaccttagcttagactcaaaaaggcaccagggacaaaactcaataaacaacaaatcagaaatgaaaaggagacataacaacagatcctgaa  
gaaatcaaaaacacatcagatcctctcaaaaaggctatactcaaaaactggaacaaactggacgaatggacaaatttctggacagataccaggtaccaaagtgaatcaggat  
caagttgacatctaaacagctcccatatcactaaagaatagaagcagtttaataatgctcctcaacaaaaaaagccaggacaggttttagtgaggttctatcagacactt  
caagaagatctaattccaattctgcacaaactttcacaataaagaagtagaaggtacttccaactcattttatgaagcactattactctgatacctaaacacagaaagatcc  
aacaagatagagaactcagaccaatttctctatgaatctgatgcaaaaactcaataaaaatctcgtcaaccgaatccaagaacacattaaagcaatcatccatcctgaccaag  
taggttttattccaggatgagggatggttttaataacgaaaatccatgaatgaatcattataaaacaaactcaagcaaaaaacacatgatcatctgtagatgagaaaa  
gcatttgacaagatcaacaccattcatgataaaagtttggaagatcaggaatcaaggccatacctaacaatgataaaagcaatctacagcaaacagtagccaacatcaag  
taaatggagagaagctggaagcaatcccataaatcagggactagacaagctgcccactttctccctactttcaacatagacttgaagattagccagagcaattcgacaacaa  
aaggagatcaaggggatacaaatggaaggaaggaagtcaaaatcacttttgcagatgatgatagatataaagtgacctaaaaattaccagagaactcctaaacctga  
taaacagctcggtgaagtagctggatataaaataaaactcaaacaggtcaatggcctttctatacaagaataaacaggctgagaagaatagggaacaacaccccttctcaat  
agtcacaaaataataaaatcttggcgtgacttaactaaggaggtgaaagatctgtatgataaaaactcaaatcctgaaagaagaataaagaagatctcagaagatggaa  
agatctccatgctcatggatggcaggatcaactgttaaaaatggctatcttccaaaagcaatctacagatcaatgcaatccccatcaaaatccaactcaattctcaacgaattg  
gaaggagcaatttgcaaatgtctggaataacaaaaaacctaggatagcaaaaagcttctcaaggataaaaagaacttctgaggcaatccaccatccagacctaagccttactaca  
gagcaatttgataaaaaactgatggtactggtatagagacagacaagtagaccaatggaatagaattgaagatccagaatgaaccacacaccttaggtcactgtacttcgacaa  
gggagctaaaacatccagtggaagaagacagcattttcaacaatggtgctggcacaactggtgttatcgtgtagaagaatgcaatcgatccatacttactcctgtactaaggt  
caaatcaagtgatcaaggaacttcacataaaaccagagacactgaaactatagaggagaaagtggggaaaaagccttgaagatagggcagaggggaaaaattcctgaacaga  
acagcaatggctgtgctgtaagatcgacaatgggacctaataaactcaaaagtcttgcaggcaaaagacacgctcaataagacaaaagaccaccaacagattg  
ggaaggatcttacctatcctaatacagataggggactaataccaacatataaagaactcaagaagggtgactcagaaaatcaataacccccataaaaaatggggctcaga  
actgacaagaatctcactgaggaatccgaatggcagagaagcacttgaaaaaatgtcaacatccttaacatcagggaatgcaaatcaaaaacacctgagattccacct  
acaccagtcagaatggctaagatcaaaaatcagggtgacagcagatgctggcgaggatgggagaaaggaacactcctcattgttggggagtgaggcttgaaccactc  
tggaatcagctggcgttctcagaaaactggacatagtagtaccggaggatccagcaatacctcctggcctatatacagaagatgccccacaggtgaagaaggacacatgct  
cactatgtcatagcagccttattataatagccagaagctggaagaacactagatgcccccaacagaggaaatggatacagaaaatgtggtacatcacaaatggagtactactca  
gctataaaaaagaatgaattatgaattctagccaaaatggatggacctggaggcctcctgagtgaggtaaacacattcaaaagaactcacacaatgattactgataag  
tgatattagccccaaactaggataccaagatataagatataattgctaacaacatgaaactcaaggagaatgaagactgaagtgaggactatgccctccttagattgggaa  
caaaaacacccatggaaggagttacagagacggagtttggagctgagatgaaaggatggacatgtagagactgcatagccaggatccccccataatcagatcaaacgctga  
caccattgcatacactagcaagattttatgaaggacgcagatgtagctgtcttctgtagactgcccgggcccagcaaacacagaagtgagctcagctcagctaatggatgg  
atcataggctccaatggaggagctagagaagtagccaaggagctaaaggatctgcaaccctatagtggaacaacattatgactaacaggtaccccgagctctgactcta  
gctgcataatatacaaaagatggcctagctggcctacactgggaaagagaggccatggacttcaaatctatgccccagtagcaggggaaatacaggggccaaaaaggggagtg  
ggtgggcaggggagtggggtgggtggatgggggacttttggatagcattggaatgtaaatgagttaaatcaataaaaaatggaaaaaa

Figure S12. The consensus sequence of L1MdA\_I in the LINE-1 family.

Read #1 Alb-L1-Alb @6054e536-fd9d-4ce6-bf33-b065bed95978

GGCACCTCAACTCCTGAAGCAATGCAAGGCAGTACGTTTACTATGTCATTGCCTATGGCTATGAAGTGCAAATCTAACAGTCTGCTAATACTTTTCTAACATCCATCATTCTTTGTTTTCAGGGTCA  
AACCTTGTCTAGTAGTGAAGAGCGCTTAGTCAAAATTTAGAAATTTTAGGGTCTTATATATACATATCATATCATCTGCAAAAAGTGATATTTGACTTCTCTTTTCAATTTGTATCTCCTTGATCTC  
CTTTTGTGTGCGAATTTGCTCTAAACACATCACAACCACAACCTTCTCAGGTAACATACTTGGGACTTAAAAACATAATCATAATCATTTTTCTAAAAAGTCAAGACTGATATACATTGACAAGAG  
CCATACAGACAAGCGCAGCTGGCACTCTTAGTCTTCACTATGGTCATCAGTTTGGGTTCCATTTGTA

Read #2 Alb-L1-Alb @88a19c42-27f1-4911-b00a-1e132a1b9c61

ACATGAGGAGCAATGCAAGGCACACTTTGTTTACTATGTCATTGCCTATGGCTATGAAGTGCAAATCTAACAGTCTGCTAATACTTTTCTAACATCCATCATTCTTTGTTTTCAGGGTCCAAACCTT  
GTCCACTGTAGTCAAAAAGAGCGCTTAGTCAAAATTTAGAAATTTTAGGGTCTTATATATACATATCATATCATCTGCAAAAAGTGATATTTGACTTCTCTTTTCAATTTGTATCTCCTTGATCTC  
GTACCACTAAACACATCACAACCACAACCTTCTCAGGTAACATACTTGGGACTTAAAAACATAATCATAATCATTTTTCTAAAAAGTCAAGACTGATAGCAAAAATTTGACAAGAGCCATACAGACAAG  
ACCAGCTAACTCTTAGTCTTCACTATGGTCATCAGTTTGGTGGGTTCCATTTGTAGATAAGAAAC

Read #3 Alb-L1-Alb @d5a82961-5d4f-4c2e-b8e2-232b26dbf4d8

TTACCTGATTACCTCAAGCAATGCAAGGCAGTACGTTTACTATGTCATTGCCTATGGCTATGAAGTGCAAATCTAACAGTCTGCTAATACTTTTCTAACATCCATCATTCTTTGTTTTCAGGGT  
AAACCTTGTCTAGTAGTGAAGAGCGCTTAGTCAAAATTTAGAAATTTTAGGGTCTTATATATACATATCATATCATCTGCAAAAAGTGATATTTGACTTCTCTTTTCAATTTGTATCTCCTTGATCTC  
CAGCTCAAACTTTGCTCTTAATACTTACAAACACATCACAACCACAACCTTCTCAGGTAACATACTTGGGACTTAAAAACATAATCACAATCATTTTTCTAAAAAGTCAAGACTGATAACCAATT  
GCAAAAGGCATACAGACAAGCAGCTGGCACTAACAAGAGTCTTCACTATGGTCAATGGTTTGGAGTCCATTTGTAGATAAGAGCTGAGGTGC

Read #4 Alb-L1-Alb @0d0a64cb-40d1-46c7-bbae-5601d14b962e\_R

CCTTACGTCGAAGCAATGCAAGGCAGTACGTTTACTATGTCATTGCCTATGGCTAAGAGTGCAAATCCAGTCTGCTAATACTTTTCTAACATCCATCATTCTTTGTTTTCAGGGTCCAAACCTTGTCA  
AACCTTGTCTAGTAGTGAAGAGCGCTTAGTCAAAATTTAGAAATTTTAGGGTCTTATATATACATATCATATCATCTGCAAAAAGTGATATTTGACTTCTCTTTTCAATTTGTATCTCCTTGATCTC  
TTGACACCTAAACACATCACAACCACAACCTTCTCAGGTAACATACTTGGGACTTAAAAACATAATCATAATCATTTTTCTAAAAAGTCAAGACTGATAACCAATTGACAAGAGCTTT  
TTCATACAGAGAGACAAGCAGCTGGCACTCTTAGGCTTCACTATGGTCAATGGTTTGGAGTCCATTTGTAGATAAGAAAC

Read #5 Alb-L1-Alb @845b268b-2288-4aa5-b915-53780c9fa804\_R

AGTCAATGAGCAATGCAAGGCAGTACGTTTACTAGTCAATGGCTATGGCTAAGAGTGCAAATCTAACAGTCTGCTAATACTTTTCTAACATCCATCATTCTTTGTTTTCAGGGTCCAAACCTTGTCA  
CTAGTCAAAAAGCGCTTAGAGCTGGATATAAAATTAACCTCAAAAGTCAATGGCTTCTCTACAAAAGATAACAGGCTGCAAAAAGATAAGAAACAATACCTTCTCAATAGCTCACAATAA  
TATAAAATACCTTGGTGTACTAATAAGCCTAAACACATCACAACCACAACCTTCTCAGGTAACATACTTGGGACTTAAAAACATAATCATAATCATTTTTCTAAAAAGTCAAGACTGATAACCAATT  
ATTCTACAAGAGCCATACAGACAAGCAGCTGGCACTCAGTCTCATGACTGGTCACTAGTTTGGGTTCCATTTGTAGATAAGAAAC

Read #6 Alb-L1-Alb @9aca963b-8fb1-4709-905c-f0ba2759f766

GAGCCATAGCAATGCAAGGCAGTACGTTTACTATGTCATTGCCTATGGCTAAGAGTGCAAATCTAACAGTCTGCTAATACTTTTCTAACATCAAAGCCATTTCTTTGTTTTCAGGGTCCAAACCTGTA  
TAGATGCAAGAGCGCTGGGAAGTAGACAATAAAGAAACCCAAAGCATGAGCAACGCTGAAGATAGAAACCCTAGGAAAGAGATCTAGAACCATAGATGCGAGCATCAGCAACAGAAATACAGAAATGG  
AAGACAATCTCAAGGTGCAAGAGATTCCATAGAAACACTCTAGCTTACATCACAACCACAACCTTCTCAGGTAACATACTTGGGACTTAAAAACATAATCATAATCATTTTTCTAAAAAGTCAAGACTGATAACCAATT  
CTGATCAAGACTGATAACCAATTGACAAGAGCCATACAGCCAGACAAGCAGCTGGCACTCTTGGAGTCTTCACTATGGTCACTAGTTTGGGTTCCATTTGTAGATAAGAAAC

Read #7 Alb-L1-Alb @92f1ed7a-d649-470f-bc21-3215f61678e1

GGCTGACAGAGCAATGCAAGGCAGTACGTTTACTATGTCATTGCCTATGGCTAAGAGTGCAAATCTAACAGTCTGCTAATACTTTTCTAACATCATCATTCTTTGTTTTCAGGGTCCAAACCTTGT  
TCACTAGATGCAAAAAGCGCTTAGATAGATCTTATTAATAAATGGACTTCCCAACCCAAAACCTATCAAAAAGACAAGGAAGGCACTTCAATCTCATCCAAAGTTAAAACTTTCCAGAGGAACCTTCCAAATCTG  
AATATCTATGCTCCAAATGCAAGGCAGCCATTCATTAAGAGACTTTTAGTAAAGCTCAAAAGCATTACCTCATACACAATAATAATAGGAGACTTGGCTACTTTTCAATCAATGGATAGATCTGCTG  
CAGAAAACTAAACACATCACAACCACAACCTTCTCAGGTAACATACTTGGGACTTAAAAACATAATCATAATCATTTTTCTAAAAAGTCAAGACTGATAACCAATTGACCAAGAGAGCCATACAGACAG  
CACAACCTAACACTCTGAGGCTTCCATGATGATCATTGGGTTCCATTTGTAGATAAGAAAC

Read #8 Alb-L1-Alb @7a05acea-6e10-403a-bfd9-d05e5b25ef5c\_R

ACCACATCAAGCAATGCAAGGCAGTACGTTTACTATGTCATTGCCTATGGCTAAGAGTGCAAATCTAACAGTCTGCTAATACTTTTCTAACATCCATCATTCTTTGTTTTCAGGGTCCAAACCTTGT  
TCACTAGATGCAAAAAGCGCTTAGAAGTATGGATGATTCATCTTCTACATGATAAACAACAGTTGTGCCAGCAAAATGTTGAAAATGCTGTCTTTTCCACTGGATGGTTTGGCTCCCTTGT  
TGAAGATCAAGTACCATAGTGTGTGGGTTCAATTTCTGGGCTTCAATTTCTAATTTCAATTTGGTCCACTTGTGTCTTATACCAGTACCATGCAGTTTATTAACAATGCTCTGTAGTAAAGCTTGG  
TCCATAACACATCACAACCACAACCTTCTCAGGTAACATACTTGGGACTTAAAAACATAATCATAATCATTTTTCTAAAAAGTCAAGACTGATAACCAATTGACAAGAGCCATACAGACAGCAAG  
ACCAGCTGGCAGCTTAAATGTTCACTATGGTCACTAGTTTGGGTTCCATTTGTAGATAAGAAAC

Read #9 Alb-L1-Alb @05d5093e-f9d6-4514-8d26-c3a74881845f

ATTACCTCAGCAATGCAAGGCAGTACGTTTACTATGTCATTGCCTATGGCTAAGAGTGCAAATCTAACAGTCTGCTAATACTTTTCTAACATCCATCATTCTTTGTTTTCAGGGTCCAAACCTTGT  
CACTAGATGCAAAAAGCGCTTAGTCAAAAATGATCCCCACAGTGGTCAATTTGATGGTGCAAAAGAACTAAAACCATCCAGTGTATAAAGACAGCATTTCAGCAAAATGGTGTGACAGTATCATG  
TAGAAGAATGCAAGCTGATCCATTCTATCTCTGTACAAAACAGTCTAAGTGGATTAAGGAAGTGCATAAAAATAGAGACACTGAAACTTATAGAGGGGAAAAGTGGGAAGACCTCAAAGATGTGAG  
GAAGGGGAAAAATTCCTTGTCTGTAAAGATTGAGAATGGACAATGGGACCTATAAAATGCAAAAGCATCTGTAAGAAGACAAGGACACTTATCAAAAAGACAACAACTGCAACCAACAGATTGGGAA  
AGATCTTTACCAATCTATCTCAGATGGGGCTAATATCCAAGATATATAAAGAAGTCAAGGAAGTTGGTGTGTAAGAAAACCAAGTAACTATTAAAAATGGGTACAGAAAACAAACAAAGAAATCTCA  
AGGAATACCGACTGGCTGAGAAAGCACCTAACAAAATGTTCAACGTCCTTAATCTCAGGGAATGAAAATCAAAAACACCTAAGATTCCCACTCACACCAGTCAAGATGGCTAACATCAAAAATTC  
GGTGACAGCAGTCTGTGGGATGAGAGAGGAGAACACTGCTCCATGCTAGTGGATATTGGCTGGACAGCCACTGTGAAAATCAGTTTGGCATTCTCAGAAAAATTTGTCATAGTTTCTACT  
GGAAGGTCAGCAGTACCCTCTGGACATTTTACAGAAAGTCTCAACTTGAATAAGCACACATACCTCACTATGTTATAGCAGCCTTATTTATAAGAGCAGGAAGCTGGAAAGCAACAGATGTCC  
TCAACAGAGAAATGGATACAGAAAAATGTTGATACATTTACACAACGGAGCTATTAATAAATCAATGAGTTCAATGAAATTTCTAGACAAATGGATGAACTATAAAAATATCATTATGGTGGGTAAACCCAGT  
ACAAAAGAACACATGATATGCACTACTGATAAGTGGATATTAGCCAAGTTAAAAATCCACAGATACATTTTACAAAACACATGAAACTCAAGAAAAGGAAGCAAAAGTGGACACTTTGACCCCTTC  
ATAGAAGGAGATAAAAATACCCATGGAAGAAGTTACAGAGACAATAGAAGTTACAGAGCAGACTGAAGAAATAACCATCCAGAGAAACTGCCCTACCTGGGATCCACATCCAAAAAACAACTAAACCC  
AGACACTATTGGGATGCCAATTAACCTTGTGGCAGGACCTAACATAGCTGTCTCCTGAGAGGTTCTGACGGTCTGACTAATACAGAAATGGATGCTCAGCTCATCCATTAGATGGAGCATAGG  
GTCCCAATGGAAAAGGAGCTAGAGGAGTACCAGGGAGCTGAAGGTGATACAATCCCTAGGAGGGAGGAACAATATAAACAACAGTAATCTGCACCACAGGTTGGCACTTTTCAGGGGAAATGAT  
GGATGTGAAAATTAGCAAGGACTTTAGGATTTGCATCTCATGGCCGCAAGGAGCTGACATAGTAAACGTAAGTGCCTTGCATT

Figure S13. (A) The representative read sequences display the insertion of a single LINE-1 fragment at Alb.

Read #10 Alb-chr1-L1-Alb @450abd0c-3536-4496-b7d3-78d412798077\_R

ATGC AAGGCAAGCTTAAGCTTTACTATGTCATTGCTTATGGCTATGAAGTGAATCTCAACAGCTCTGCGAGAAGCTTTCTAACATCCATGATTCTTTGTTTCCAGGGTCGGTACCTTTGCTACTAGATGC  
AAAGACGCCTTAGCGTGCACAGGGTCAAGTCAATTGGAGGTGAAGTGTCCATAAGGTCCTAATTAACCAAAAATCTATCTCCAATTGATATAACCTTTATAAAGAAAAATATTAGTTTACTCCAAATGAT  
TTCAGTGCAGTGAAGGCCAAACAATTTCCAAAGCAAATGGACTCAAGAAACAAGCTGGAGTAGCCATTATATGGATAAATCTACTTCCAAACCCAAAGTTATCAAAAAGACAAGGAGGGACACTTC  
ATACTCATCAAAGTAACTCTCCAGAGAACTCTCAATTCCTAAACACATCAACCCAACTTCTCAGGTAAGTACTACTTGGGACTTAAAAACATAATCAATAACTATTTTCTAAAAAACCATCA  
AAGACTGATAACCATTTGACAAGGCCATACAGACAGTACCAGCTGGTACTCTTAGGCTTCAGTATGTCATCAGTTTGGGTCCATTTGTAGATAAGAAACTG

Read #11 Alb-L1-chr15-Alb @c7c6b1ba-fd1e-4ca1-aded-92dd0734e698

GCACCTGCAACAGAGGAGCAATACGAAGGCAGTACGTTACTATGTCAGAGCTGCTATATGAAACATGAAGTGAATCTCAACAGCTCTGCTAATCTTTCTAGCATCCATCTTTCTTTGTTTCA  
GGCTCCAAACCTTTGCTACTAGTACGAAGAGCGCTGCTACTCTCTTTTAAAGTCTAGTATGGTTTGTTCATTTCCATCACCTGTTGGATGTGCTTCTCTTTTCTTAAAGACTTCTACTCGTGT  
TGATTGTGTTTCTCTTTCTTTTAAAGACTTGTAACCTTAAACACATCAACCCAACTTCTGAGTAACTATCTGGGAATAAAAACATAATCTAATACTTTCCCTAAAAACGATCAAGACTG  
ATAACCATTTGACAAGGCCATACAGACAGGACCAGCTGGCCTCTTAGGCTTCACATGTGTCATCAGTTTGGGTCCATTTGTAGATAAGAAACTGAGGTGC

Read #12 Alb-L1-chr17-Alb @9df79b4a-32fc-4a67-b4d7-d517944ee53e

CCGTCAACAGCAATGCAAGCCAGTACGTTACTATGTCATTGCTTATGGCTATGAAGTGAATCTCAACAGCTCTGCTAATCTTTCTAACATCCATCTTTCTTTGTTTCCAGGGTCCTAAACCTT  
GTCACATAGTGCAGAGCGCTTACTATACAGGTATGACAAACATACCTGGCTGTGTTCTTAAAGAAATAGTCCAAAAATCTCTCTATAAACAATATAAAAAATAAACTGTCAGGCTCTGAGAGAT  
GAAAATATTTCTGTCTCAAAAACTCTCAGGAGAAAAAGACAGGGCCCTACTCAGAGTGAAGGGCTGGGGAAAAACAATTTCCAAAGCAATGAGAACTGGAGTAGCCATTTAATAT  
GGATAAATCGACTTCAACCCAAAGTTATCCAAAAAGACAAGGAGGCGCTTCTATCCATCAAGGTAAAACTCTCAAGAGAGGAAGTCTCAATTTCTGAATATCTACGCAACAAATGCAAGGGCAG  
CCACATTCATAGAGACACTTAGTAAAAACAAAGCATACATGACCTCACACAATAATAGTGGAGGAGCTTCAACACACCCTTTCTCAAAGGACAGATGTGAAACAGAACTAAACAGGGGACACA  
GTGAAACTAACAGAAAGTTATGAACAAGAGCAGAAATCATAGGCATTTGGCCAAAACCTTCTGATGACTCACTTTGGCCATCAGCAACTGGTCAAGTCAATGATCAATGATCAACCATCTTCTTTAAAA  
GATTTATTTGTTTGTGTATACGAGTATACTATAGCTGTCTTCAGACACATCAGAAAATGGGCATCAGATCCATGTCAGATGGATTGTGAGCCACCATGTGAATGCTGGGAATGGACTTAGGACCTCTGG  
AAGACAGTCAAGTCTTAACTGCTGAGCTTCTCTCCAGCTTATACCATCTCATTTGATATAGATGCTGTGCTGTCATGCTACTTATGTTTGTGTGCATAATAACTTAGCTCATGATGG  
GCAGCTCTGAGTGCATGTTAACTAGCAGCATTTGCAAAATGTCAGTTCCAGTACAGGCCAATGAGGCAAGCTGTCTTAAAGGGAGAATGATTTGTTGTGCAGATACCGGTAGAGCCTGTTCC  
AAAACTCAAAGGCTTTTCTGTGATTACCTATTTGATTAAGCAAGCTCCAAACAGCTTCCCGCTTGTGTCATGACCTCAAGTACCATTTGGGTCTGCTGGATCATGTCATCCAAAGGTTAGAACA  
GCCCTGCAGTAGCCTGGATCTGTTGAGGCTCTCTCTGTCAGGCCCCACAAAACTAACAGCTTCCAAAGTCAATGATATAGGCTGGAGTAAACAAACCCATGTGAGAGTTGTAATGCTCCAGAA  
GCCAAATAGACCCACTAACATTTGCTCTTTCTTTGGTGGGGGGGGTGGGTCACTGCAATTTATTTCTTACATACAAGAAATCTCTGCTGCTCCCAACACCCTGGACTTCAAGGGATTTCT  
TGCTGTTGAGACAGTCTTTGAAATTTTCTATCTCTGATTTCTGATTTACTACATATCTGTTATTTCAATGATAGTAGTACTGATGACTGGTCCAGCATAATGCTCAATATAAATGGCCAAATGG  
ATATTTTGTGGAAGAGTACAGCAATCAAGTCTCTTAACTAAGTTATGACACAGAACAGGAGAGTCTATATCTCTGAGTAAAAGTGTAAAGGATCTAAACACATACAGAAAAGGCCAACCTTC  
TCAGGTAACATGCAAGGACTTAAAAACATAATCATAACTATTTCTTAAAAACGATCAGACTGATAACCATTTGACAAGAGCCATACAGACAGGACCAGCTGGCCTCTTAGGCTTCCAGTATGGT  
ATCAGTTTGGGTCCATTTGTAGATAAGAAACT

Read #13 Alb-L1-chr1-L1-Alb @d2d48a3f-5803-4c82-b0fc-7af9a078f5e7\_R

CAACAACACTGCAATGCAAGGCAAGCTTACTATGTCATTGCTTATGGCTATGAAGTGAATCTCAACAGCTCTGCTAATCTTTCTAACATCCATCTTTCTTTGTTTCCAGGGTCCTAAACCTT  
TTGATTCATCTTATCTCTGTTACAAGCTCAAGACTAAGCAGATCAAGCACTCCACATAAAAACAGAGACACTGAACTTATAGAGGAGAAAGTGGGAAGAGTCTCGATGATATGGGCACAGAGAAAAATCTGTAACAGCACT  
AGTGGTGTGCTGTGAAGATGCAACATGGAGCCCTCAAAAAATTAAGCTTCAATAAAGAAAGGAGCAGTGTCAATAGCAACAACAGTGGGAAAAATCTTCCAACTCCTAACCAATAGAGGATAATATCCAAAT  
TATTCAAAAGCTCAAGAAAGTTAGAACAAACCAAAATACCCCTATTTTAAAAATGGGATACAGAGCAAAAGAACTCTCAACTGAGGACTCCAAATAATGTGGGAAGCCAAATAATCTCAACTCTTAGTCATCAGGAAATG  
CAATCAAAAACCCCTGAGATCCACTCACACAGTCAAGTGGCTAAGTCAAAAATCAGGTGACAGCAGACTGGCAAGATGTAGAGAGAGGAGTCTCTCCATGCTGGTGGGATGCAAGCTGGTCAAAAACACTCTGAAAAATC  
TGTTTGGTGTGCTCAGAAAATGGACATAGTACTATCAGAAGATCCAGCAATCTCTCTCTGGGCTGTACTGAGAAGTCTGCAACTGGTAAATGACAGCTGCCACTATGTTTATAGCAGCTTATTTATAAAGCCAGGAGTGGG  
GAGAGAGGCCAGATGCTCCAAACAGAGGAGTGGATACAGAAAAATGTGGCAGCTTTACACAATGGTGTACTACATAGCTATTAAGCAACAATGAATTTATGAAGTTCTAGACAAATGGAGTGTAGGATCTCAAGTGGATTAAC  
TCAATCAAAAAGACTCATGATATGATGACTGATAGTGGATATAGCCAGTACTGCGAAATCCAAAGATAGCTTTGCAAAAATATAGAAATCAAAAAGAGGACCAAAAAGATGATGATGCTCTCTATAGAGGGGG  
GAGCAAAATCACTAAGGAAAGTTACAGAACAGTTCAGACAGAGACTGAAGAAATGACATACCAAGATGGCCCACTGGGATCCATCCCAATAAACACCCAGCAACACTATGTAGACACCAACAGAGCTTGTCTGC  
AGGACTGATATAGTGTCTCTGAGAGGCTCTGCCACTACCTGCAAAAATACAGAAGTGGATGCTCAGAGACTCCATTTGGACAGGAGCTAGAGGAAGTATCCAGAGGCTGAAGGGGTTAGTAGGCCATAGAGAAACAAAAATATAACT  
AACCAGTACACTGAACTCCCTGGAAAGTAACTACCAATCAAGAAAACATATGGTAGGATCATGTTCTAGCTGCATATGATGATAGGATGGCTAGTCACTTAAATGGGAAGAGAGGCTTGTGCTGTGATGTTCTATGCCCCAG  
TATAGAGAACTTCCAGGGCCAGGAATTTGGGGAGTGGGTAGGTTGGGGAGCAGGGGATAGGGGAAAGGGATAGGGGATTTTGGTGGGAACTGGAAGGATAAATCAATTTGAAATGAAGAAAAATGAAA  
TGGGCTCAGAGCTAAACAAGAAATGCTCAAGTGGAGAAATCAAAAGCCCAAGAGCACTAAAGAAATGTTCAACACTCTTATGATGAGGAAATGCAATCAAAAACCCCTGAGATCTCACTCCAGCAGCTGATGATGATC  
AAAAACTCAGTGAACAGCAGATGTGGGAGATGTGGGAAGAGGGGAGCTCTCCATTTTGGTGGGATGTAACTAATAACAACACTTGGAAATGCAATAGCCTAGCATAACAGACTACAGAAATCCAGCTA  
TGATCCAGTATACTACTCTGGGCATATACCCAGAAAGTGTCTCAACATGTAATAAGGACACTGCTTACTATCTATAGCAGCCTTATTTATAATAGCCAGAAAGTGGAAAGAAACCCAGATGCTCCAAACAGAGAAATGGATACAG  
AAAAATGGGCACTTACACAATAGAGTACTACTCAGTTTCTTTTAAATGATGAATCATGAAATTTCTAGGCAAAATGGAACATAAATCACTGAGTGAAGTAAACCAATCAAGAAAGACACATAGTATGATCACTGATGAT  
AGTGGATACTATGTTTCAAACTCCAAATACCCAAGATACAATCTCAGACACCACATGGAAGCTTAAACACATCAACCAACCACTCTCAGGTAACATACTCTGGGACTTAAAAAACATAATCATAACTTTTCTTAAAAACGGAT  
CAAGACTGATAACCATTTGACAAGGCCATACAGACAGCACCAGCTGGCCTCTTAGGCTTCCAGTATGTCATCAGTTTGGGTCCATTTGTAGATAAGAAACT

Read #14 Alb-chr5-ch1-chr2-L1-Alb @6cbc53de-41a9-4812-9844-df95ef5c762b

GCACCTGCACTAGACAGCAATGCAAGGCAAGCTTACTATGTCATTGCTTATGGCTATGAAGTGAATCTCAACAGCTCTGCTACTTCTAACATCCATCTTTCTTTGTTTCCAGGGTCCTAAACCTTGTCACTAGATGCAAA  
GACGCCCTTAAAAACAGCTGGATCTATGTCACAGTGTGTTGCTACTATGCACTGAAGATTTCTTATTTAGTACAAGTAGAGGTAATAATAGAAATATAGATAAATTTCTGGCAACTACATATTTAGAACAGGCCAAAGTTAAATGCTATGCT  
ATAAATGCAACCAATTTAAATCTGAGCTGGGACATCTGGCAAGTACTGACTTATAAGTTTATAAGGAGAGACTTGTTCACCTTGGCTTAAAGTAGGTAATGATAAATTTTGGCAAAATAGACTTGGAGAAACCCCAAGCA  
AAGGAATGTAATAGTTTATGAAAAAAAATTAACCTCAGAGATTTTATGCAAGCATGTTGATGTCOCCAAATAGGTCACCCAGTGTTTTACACATAAATGCAATAAAAAATGAAAAAAAACATTCATGCTCTACTGCTCTCTAGCAAT  
CAATAAATGACTCTAGAGATTTTAAACAATATCAAGTTAAACAAAAGATATAGGATAGGTTAAATTTGGCTAATGGAACATACATGATGAACATTTCTCTATGTAACATACAGACATAATATAGTATCTGCTGGAGGCTCTGCTGGAG  
TACTGCAACATAATTTGGGAGGTTGCTTCTCCACTGCAAGCAGGCTGAGCCTGCAATAGAAGAGAGTCTCCAAACAGGGGAAATGTTATTTGAGCAGATGCAATAAAGAGGAAATTTGGCTTTAGTGGGAGAAATGTCATACT  
TACTCTGCACTATGTTGCAAAACCTAGCTCTCAAGTCAGTACCTAACTCTGTCTTATGCTGTTCTTCAACAACTTTCTGCACTGAACTATCAACCTGGCTCTGCTCTTATTTTAAATGTTTCTGAAAAAATAGGACACAG  
GGCAGTTTAACTTTTAGCCAAAAGTGAAGCAACATTAATTAATAAAAAATGTTCACTAATGAATGCAATGTCGAGCTTTCTCAGCAGCACTTAAAGTTGATCTATAGTCTCTACACCTTACTTAAAGCAGAGTCCAAATG  
TCTGACCAAGCATATGTCOCCAAAGTTTATAACAGATGATAATAACTGAGTATGATGACTAATTTAAACAGCTGAAAACTCAAAAAGAACCCCAATCAATGCAAGATTCTAGCACAATAGGTTTTCTGTTAAGAAAGAAAAATGAAAAAGC  
TAGCTTGTATATCTAAACATTTTAAAAATAATAGGCTTTAGATTTTAAATTAAGTAAATTTAAATACAATTTCTGCACTCTCTTTCCCTCTACTGTTTTCTATATTTCCGATGTGGCCATAAAGGCTCAGCTGATATGCT  
TACTTCTTATTTTGGGTTTGTAGACTAGATGACTGACTATGACTTCTTTTATGAAATTACTTACATCTGCTTCTTTGGGTTATAACACAGCAAAAAATGAGTAAAGCTGCTAATAATGAGTTTAAATGTTGTGTGACAGATACTC  
GACTAAGGCAAACTTTATGAAACAAATTTAAATGGGGCTGCTCAGAGTTCAGAGTTCATGCTTCTCAATGAGTGAAGTAACTCAAGTGGAAAACTGGCAGTATCCAGGCGGGCAGAGTAGAGTTACTATCTCATCOCAAAAGCTGCTAGGAGAA  
GACTGACTTCCAGGCAACTAGGGGTGAGGCAATTAAGCTCCACCCACAGTGCACACACTCTCCAAACATGTCACACTTATCCAAACAGGCCCACTTCCAGAGTGGTCCACTCTGCTGGTCCAAAGAAATTCCAAACCATCACAAGAC  
AAACGATTTTTATGCCAGCATTCACTACAGATGATGTTCTGAGGACACATCTGAGTGTCTCACAACATGTGGCAAAAAGATGCTATATAAAAAATAGGTGTGACAGAGCTCAATGATCAAGGGGATACAAAATGAAGAGGGGAAGTCA  
AAATATCACTTTGCGAGATGATATGATATATATAAGGACCCCTAAAAATCCACCAAGAGACTCTCAACCTGCAACAGCTTGGTGAAGTGGTGAAGTACTGGAATGAGTGGCAATAAAATTAAGTCAACCAAGTCAATGGCCCTTTCTCACAAAAGAAATA  
ACAGCTGGAAGAAATAGGAAATCAACCCCTTCTCAATAGTCCAAATAATATAAATATCTCTTATGACTTAACTAAGAAAGTGGTATGATATAAATCACTCAAGTCTGTAATATAAATCACTCAAGTCTGTAAGAAAGAAATTAAGAAAGATCTCAGAAGA  
TGGGACGATCCATGCTAGTGGGATGGGAGGATCAACTTGTAAAAAATGTCATTTGCCAAAAGAACTCAGACTCAATGCAAGCAACCCAAATCCAAATCCAACTCAATTTCTCAAATGAAATAGAGAGGAGAAATTTGCAAAATCTACTA  
TGTAGAAATCAAAAACCTAGGATAGCAAAAAAAAACCTTCTCAAGTATAAAGAAACCTCTGGGAAATCAACCTGCTGCAAGTCAACCTGCAAGGAGCAAGCACTTTCAACAATGGTGTGGCAGCAACTGTTTATGATAGAAAG  
TAGAACATGAAATGAAATGAAAGCCAGAAATGAACCTAATACTATGCTCAGTCAAGCAAGGAGCAATAAACCTCAATGGAAGAAAGACAGCACTTTCAACAATGGTGTGGCAGCAACTGTTTATGATAGAAAG  
AATGGGATGATCACTTATCTGTTACTAAGTCAAATTAATGGATCAAAAGAACTTCACATAAACCAGAGCACTGAACTGAGTGGGGCGGCTGGGGGAAAAAGCCCTGAAGATAGGGGACATCATGTTCTCAGCACTCT  
CTCAGGTAACATACTTGGGACTTAAAAACATAATCATAACTTTTCTTAAAAACGATCAAGACTGATAACCATTTGACAAGAGCCATACAGACAGCACCAGCTGGCCTCTTAGGCTTCCAGTATGTCATCAGTTTGGGTCCATTT  
TGTAGATAAGAAACTAGGTCOCGC

Figure S13. (B) The representative read sequences display the insertion of LINE-1 and genomic DNA fragments at Alb.



Read #16 **Alb-L1-BB-Alb** @1716251b-f892-4f78-a6d6-bac4f37df9f3\_R

GCACCTGATATGCGTTAGTAAGTGAAGGACAGTACGTTTACTTGGCTCATGGCTAAGTGGCTATGAAGTGCATAAATCCCAAGTCTCTGTAACACTTTTCTAACTCCATCACTTTCTTGTTCAGGTCACAACTTGTCACTAGATGC  
AAAGACGGTACGCACACAGAGGTTTCTTTCCTGAGAGGAGCTATCCCTGGTTTTTGGTTATTCGACAGGATTTGCAAAATGTCCTTCTAATTCGTTGGAAGAAATGAGTGGAAATTAATGGAGGATGCAATGAACTGTAGATGG  
CTTCGGGAAATGCGGCGAAACCCCTATTTTATTTTCTTAAATCAATCAATATGATTCGCTCATGAGACAATAAGTCAATGCTTCAATATATGGAAAGGAAAGATGAGTATCAACATTTTCGAGTTTTCGCTCCATTTTC  
CTTTTTTGGGCGCATTTTGCCTCTGTTCTTGTCTCACCAGAAAGCGCTGGGAAAGTAAAGATGCTCGAAGATCAGTTGGGTGATCAGTGGGTACATCGAATGGATTTTAAACAGCGGTAAGATCTTTGAGAGTTTTCGCCCCAAG  
AACGTTTCAAAATGATGAGCACTTTAAAGTCTGCTATATGTTGGGCGGTTATATCCGATTTGACGCGGCGGCAAGGCAACTCGGTGCGGATTTGATCGAGTTTCAGAACTGCTGAGTACTACCAGTACAGAAAAGGCACTACGAGATGG  
CATGACAGTAAGCAAAATATGCGAGTGTGCCATAAACCATGAGTGAATAACCTGCGGCCAATCTCTGCAACAGTTCGGAGGACCCGAAAGGACTAACCGCTTTTTGCAACAACATGGGATCATGTCGCTTATGTTGGGAGATG  
GCTGAATGAGGCATACCAAACGACGAGGCTGACACCAAGTGTGCTGACAAATGTGGCAACAACCTGGCCGCAACTTAATCTGAGGAACACTTACTCTAGCTTCCGCGCAACAATTAAGCTGGATGGGCGGATGTTGGCGGAC  
CTCTCTGGCTGGTCTTCGCGTGGCTGTGTTATGCTGATAAATCTTGGACCGGTGTGCGGTGCTCGGTATCATTTGACAGTCTGGGGCCAGATGGTAAAGCGCTCTGCAGTATGTTACTACGAGGGGATGACGCAACTATG  
GATGAACGAAATAGACAGATCGCTGAGATAGGCGCTTACTGATTAAGCATTTGCAACTGTCAAAACAAGTTTACTCAGCGGTATACCTTAAATGATTTAAACACTCATTTTTAAATTAAGAGTATGAGTGAAGATCTTTTGATAATCTCA  
GGACCAAAATCCCTTAACGTGAGTTTTCGCTCAGCTGAGCGTCAAGCCCTTGTAGAAAAGATCAAAAGGATCTCTTGAAGATCTTTTTTCGCGGTAAATCTGCTGTCGCAAAAACCAACCGCTACCGAGCGGTGTTTGTGGCG  
CATCAAGAGAGTCAACACTTTCCGAAAGTCACTGGCTTCAAGCAGAAAGTAGATAACCAAACTACTGTTTCTCTAGTGTCCGCGGTAGTTAGGACCACTTCAAGAACTTACAGAGCTTACCACTGCTTACCACTGCTTACCACTG  
GCTGAGATGCGCATAAAGTCTGGCCCTACAGGGCTGGAOCTCGAACAGATAGTTACCGGATAAGGCGAGCGGTGCGGTGGAACGGGTTGCTGCACACCGCAAGCTTGGGACGCAAGCACTTACCAACCTGGAGATACCCACAGC  
GTGCTATGAGAAAAGCGCACTTCCGAAAGTCCGGAAGGCGAAGGTCAGGTAATCGGTAAGCGGCGGTGCGAAAGAGAGGCGACGAGAGCTTCCAGGGGAAACCTGCTGATGTTTAAAGTCCAGCGCTTTGCGCACTGTGAC  
TTGAGCGTGAATTTTGTGATGCTGTCAGGCGGCGGCTATGAAAAGCGGCAACCGCGCTTTTTCGGTTCCTGGCTTTGTGCTGCTTTGCTCAGATGTCTTTCTCGGTTATCCCGCTGATTTGCGGATAACCGTATTAACCG  
CCTTTGAGTGAAGTGAACCGCTGCTGACGCGGAAAGCGAGCGGCGCACTGCTGAGCGGAGGAAGAGCGGCGCAATACGCAAAACCGCTCTCCCTCCGCGCGCTTCAATTAAGTCCAGCTGCGGACGAGGTTTCCCTG  
GACTGGAAAGCGCGGAGTGAAGCGCAACGCAACCGCAAGCTGCTCAACACGAGCCCGAGCTTTACACTTATGCTTTCGGTTCCGTTATGTTGTTGGAATTTGAGAGCGGATTAACAAATTTTCAATACCGAGCTGCGAGTGTCAAACA  
CATCAACAACCAACTCTTCAAGTAACTATACTTGGGACTTAAAAACATAATCATATAATCAATTTTCTCAAAACGATCAAGACTGATAAACCATTGCAACAGGCAATACAGACAAGCAACAGCTGGCACTTATAGTCTTCAAGTATGGTCAAT  
CAGTTTGGCCATTTGATAGAAGAACTGAGGTC

Read #17 **Alb-BB-L1-Alb** @f17a093d-ed82-46f9-95e2-ffbfd705893a

GTTCCTATCTCAAAATGGAACCCAGGCGGTGACCATCGTGAAGACCTAAAAATTTAGCTGGTCTTTACTGTATGGCTTGTGCAAAATGGTTATCAGCTTGATCGTTTGGAGAAAATGATATGATATGTTTTAAGTCCCAAGT  
ATAGTTTACTGAGAAAGTTGGTTGTGATGTGTTCATCTGCAACACCTGTGTGAAATGTTATCCGCTCACAATCCACACAACATACGAACCGGAAGCATAAAGGTAAAGCGTGGGTGCTAAATGGTAGGCTAACTACCTTAATTT  
GGTTGGCTCACTGCGCCGCTTCCGAGTCAGGGAACCTGTGTGCGAGCTGCATTAATGAATCGGCAACCGCGGGAGGCGGTTTGGCTATTGAGCGCTTCCGCTTCCGCTCAGCTCGCTCGCTGCGTCTGGCTGCGAG  
CGAGCGCATGGCTCTCAAGCGGTAATCGGTTTCCACAGAAATCAAGCGGATAAACGCGGAAAGAACATGTGACCAAAAGCGGCAAAAAAGGCGGAGCACTTAAAGGCGGCGCTGGGTTTTTCCATAGGCTCCGCGCCCTGCA  
CAGCATCAACAAAATCCAGCTCCAAAGTCAAAATTTGGCGAAATTTGGCAAAACCGCAGACTATAAAGATACAGGCGTTCCCTCGCAGACTCCCTGCTGCGCTTCCGCTTCCGAGTACTCGGCTCTTCCCTCT  
GGGAAGCGTGGGCTTCTCAGCTCAGCTGTAGTATCTCAGTTCGGTGTAGTGGTGTGCTCAGCTGGGCTGTGCAACGACCCCACTGTCAGCGCGGCGCTGGCCCTATTCGGTAACTATGCTGCGCAGCTCAACCCG  
TAAGCAGCACTTATGCGCACTGTAGCAACACTGTGAACAGGATAGCAGAGCGAGTATGAGGCGGTTGTACAGAGTCTTGAAGTGGTGGCTAACTACCGCTGCATTTGAAGAACAGTATTTGATATCGGCTGCTGCGAAAGCAG  
TTACTTCCCGGAAAGTATGAGCAGTCTGGTACTTGTACCGGCAAAACCAACCGCTGTGATGAACATTTGGTTTTTTTTCGCTGACTGGTGTGCTCAACCAAGTCACTTGAAGAACAGTATGAGTATCTGATCTTCTACAGGCTG  
AGTGTGGAAGCAGCAACTCAGTAAAGGATTTTGGTACGAGATTTCAAAAGGATCTCCACTGATGCTTTTTAAATTAAGAACAGTATTTGAAATAAATCAATCTGATATATGAAGTAACTGGTGTGACAGTAACTAACTAACT  
ACTGAGCACTACTCAGGACTGCTGTTTGGTGTGCTGCTGACTCCCGTACTCCGCTGAATCACTAGATAAATCAGTACGGAAGGCTTACCACTGCGCCCACTGTGCAATGATACCGCAGACCCAGCTCAGGCTCAGATTTAT  
CAGCAATAAACCGGCGGCGGAGGCGGAAAGCGCAAGTGGTCTGCAACTTTATCCGCTCCATCCAGTCTATTGGTATTTGCGGGAAGCTAGAGTAAGTGTGCGCAGTAAATAGTTTGGCGCACTGTGTGCGATGCTACAGG  
CATGCTGGTGTGCAOCTGCTGTTTTGGTATGCTTCATCAGCTCGGTTCCCAAGATCAAGGCGAGTTACATGATCCCGCACTGTGTGCAAAAAAGCGGTTAGCTCCTTGGCTCGATCGTGTGTCAGAAAGTGGCGCGTATGTTT  
TATCACTCATAGTTATGGCAGCACTGCATAATCTCTTACTGCTATGCCATCCGTAAGATGCTTTTTCTGTGACTGGTGTGCTCAACCAAGTCACTTGAAGAACAGTATGAGTATGCGGCTATCGGCTTCTGCGCGGCTCAATACCGGA  
TAATACCGGCCACATAGCAAGCACTTAAAGTGTCTATCAATGAAAAGCTTCTGCGGCGGAAAAAATCTCAAGGATCTTACCGCTTGTTCAGTTCGATGTAACCCACTGGCTGACCCAACTGATCTCAGCATTTTCTTCCACCA  
ACGTTCTGGGTCAGCAAAAAGCAGAAAGCAAAATTTGGCAAAAGGAAAGTGAAGGCGCAGCGAAATTTGAAATCACTACTTCCCTTTCAATATATGACATTTTCAATGATGATGAGCGGATACATATTAAGATCAAT  
AGAAAAATTAACAAATAGGCTTCCGATTTTCCCGGAAAGTGGCCACTGGTGGTGCAGATTACTGGTGTAGTATATATGTTCTCTCTCAGGGGATGTCATACACTCAGCTCCTGGGACTTCTCTAGCTCTTCAATGGGCACTA  
TGCTCCATTAATGATGACTGTGAGCATCACTTCTGATATAGTCAGGAACTGTCAGAACTCAGAGGACTGATTAAGTCTGCGCAACAGCTAAATGTCGATCAACAGTGTCTGGGTTGGTAAATTTTTTTTGGG  
ATGGTCCCGAGTGGGCGAGTTTTCGATGTTATTTTCAGCTGCTGCTCAACTTCTTCCATGACTTCTCCATGACTTTTGGTCCCGCTTCTATGAAAGGCTCAAAAGTCCACTTGGCTTCTCTTCCGATTTTCTGAGTTTCATG  
TGTTTGTAATGATCAAGGATTTTAACTTCTGGGCTAAATCCACTTACAGTGTGTCAGATATGATGAGTATTTTGGTACTGGGTTACCTACTCATAAGTATTTATAGTTCATCCATGTTGTCTAAATTTTATGATGAACT  
TCATGCTTTTAAATGACTCCGTTTCTGATATACCACTTTCTGATCACTTCTGCTTCTTCAATATAAATAGGCTTCTGCTTCTTATAAATAGGCTTATGAACTATGAGGATATGCTTACGCCAAGT  
GGAGCATCTTGGGTAATGTCGAGAGGTTATCCCTGGACCTCAGTGAAGATATGAACAAATTTTCTGAGAAATAACAAACTGATTTCCACAGTGGTGTGCCAGCTTACAATCCACTAGCAATGGAGAGTGTCTCTTTCTCCAC  
CTCTTACCAACTCTGCTGCTCACTGAATTTTGTATGAGCACTTGCATGCTGTGAGGTAATCGGGTGTGTTTTTGGATTTCAATCCCTGAAGATTAAGGATGTGAAACATTTTGTAGGTTCTTCAATAGTCAATATTCATA  
AGCAAACTTTTGTAGCTGTGACCCCAATTTTAAATAGTGTACTTGGTTTTTCAACCAACTCTGACTTCTTATAATCTGAGTGTGAGCGCCCTACTGAGATGGGATGGTAAAGATTTCCCGCACTGTTGGTGGTGTGAGTT  
TTGCTTTGACAATGCTTCTTGTGCGCACAGATGCTTGAATTTTATGAGTCCCACTTTGTCATCTCTCAGCAGCAAGGAAATTTTCCTCCCTCAGTCACTTCTGAGCTTCCCGCACTTCCCTCTAATAGTTCAGGTT  
CTCTAATTTATGTCAGTTTAACTAGACTTAGACTTTGTCAGGGGAGATGATGATGATCTGATCTCTTCACTCATTAACCTGTCAGCACTTTTGAATAATGCTGTCTTTTAACTACTGATGTTTATACAGGCTGTAGTTGTCACTT  
TTGTAACCACTCAATGACCACTGTGTTGGGATCATCTAAGGCGTCTTTGCTACTGATGCAAGGTTTGGACCTGAAAACAAAGAAATGATGATGTTAGAAAAGTATTAGCAGGCTGTAGTTGTCACTTATGGCATGAGCAATGACA  
TAGTAAACGACTGGCTGCTGAT

Read #18 **Alb-BB-L1-Alb** @3e9c16a4-5357-40ab-a0e4-94b9550244a9

ACTCCTGAAAGTGAAGGACAGTACGTTTACTATGTCAATGCTATGGCTATGAGTGCATAAATCCCAAGTCTCTGTAACACTTTTCTAACTCCATCACTTTCTTGTGTTTCAGGTCACAACTTGTCACTAGATGCAAGCGCTTGG  
ATTCATCTGCCACAGGTGGCACTTTTGGGAAACTGTGGCGGGAACCCCTATTTGTTTATTTTCTAAATACATCAAAATGATGATTCGCTCATGAGACAATAAAGTAAATGCTTCAATATATGAAAAGGAAAGTATGAGTATGCA  
ACATTTTCGCTGTGCGCTTATTCCTTTTTTGGCGCATTTTGGCTTCCGTTTTACTCACCGAAGAAAGCGTGGTGAAGAAAGAGCAAGATCAGTTGGGTGCAAGGATGATTTTATGAACTGGATCTCAACCGGCTAAGATCTTGAGA  
GTTTTTTCGCGCGGAAAGCGTTTCCAAATGATGAGCACTTTAAAGTCTGCTATATGTTGGGCGGTTATATCCGATTTGACGCGGCGGAAAGGCAACTCGGTCGCGCATACACTATTCTCAGAAATGACTGGTGGTACTCAOCCAGT  
GAGAAAGGATCTTACGATGGCAGTACAGAAATTTTAAATGAGTAACTTACAGCTGTGCCATAAACCATGAGTGAATAACACTGCGGCCAATCTACTCTGACAACGATCGGAGGACCGAAGGACTAACCGCTTTTTGCAACAACATGGG  
GATCAGCCACTGCTGTTGGAAACCGGAGTGAATGAGGCACTACCAAACGACGCGTGCACCAAGATGCTGTGAGCAATGCAACAGCTTGCAGCAATATAAATCGGCACTTCACTTACTTACCTTCCGCGCAACAATTAATAGACTG  
GATGGAGCGGATAAAGTTCGAGGCACTTCTGCGCTCGGCCCTTCGCGTGGCTGTTTATGTGCTGATAAATCTGGAGCGGTGAGCGTGGGCTCGCGGTTACATGCAAGCACTGGGGCCAGATGGTAAAGCGCTCCGCTATGTAGTTA  
TCTACACGAGCGGAAATCCGAGCAACTATGATGAAACAAAAATAGACAGATCGCTGAGATAGTGGCTCACTGATTAAGCAATGTAACCTGTCAGACCAAGTTTACTCATATACTTTAGATGATTTAAACTTCAATTTAAATAAAAA  
GGATCTAGGTGAAGATCGCTTTTGAATATCATGACCAAAATCCCTTAAOOGGTGAGTTTGTGCTCAGCTGGGCGTGCAGACCGGTAAGAAAAGATCAAAAGGATCTTCCCGAGATCCCTTTTTCTAGTGGCGATACTGCTGCTG  
TTGCAACAAAAACCGCTACCGCTACCGCGGTGGTGGTTTACCAGATCCAAAACTACCACTTTTTTCCGAAGTACGCTGGCTTCAAGCAGCGCAGATAACCAATAGTGTCTTCTAGTGTAGCGGTAGTTGGCCACCGCTTCAA  
AACTCTGTAGCACCGCTACATACCTGCTCTGCTAATCTGTTACCAGTGGCTGCTGCGAGTGGGTAAGTGGTCTTCAOCCGTTGACTCAAGACGATAGTTACCGGATAAAGCGCACGGGTGGCGTGAACGCGGTTGTGTCACA  
CAGCCAGCTTGGAGCGAAGCACTACACGAACTGAATACCAACGCGTGGCTATGAGAAGCGCACCGCTCCGAGGGGAGGAGGAGAGAGAAAAGGCGGACGGTTATCCGTAAGCGGCGGCTGGCAACAGGAGGCGCACAGG  
GACTTCCAGGGGAAAGCGCTGGTATCTTATAGTCTGTGGGTTTTGCGCACTCTGACTTGAOGTGGTTTTTGTGATGCTGTCAGGGCGGAGCCTATGAAAACCGCAGCAOOGCGCTTTTACAGTTCTGGCTTTTGTCT  
GGCTTTTGTGCATGTTCTTCTGCGTTATCCCTGATTTCTGTGATAACGATTAACCGCTTTGAGTGAAGTATACCGCTTGGAGTGAAGTACCGCTGTCAGCGCTGATACCGCTGCGCGCAGCGCAACGACCGGCGCGGAGT  
TACGCAACCGGCTTCCCGCGGCTGGCGGATCAATTAATGAGTGGCAGCGCAGGTTTCCCGGCTGGAAGGGCGGAGTGGCGCAACCGGTTAAAGTGGTGTAGTCTACTTATAGGCCCGGCTTACACTTATGCTTCCG  
CTGATGTTGTGGAATTTGAGCGGATAACAAATTTCAACATAAGGACTAAGGCAAAAATCTCTAATTAACAAAAATGAAAATGAAAATGAAAATGAAAATGAAAATGAAAATGAAAATGAAAATGAAAATGAAAATGAAAATGAAAAT  
GCTACTACTCAAAAATCTTAAACAACTCACCAACCAAACTTTCTAGTAACTATACTTGGGACTTAAAAACATAATCATATAATCAATTTTCTCAAAACGATCAAGACTGATAAACCATTGCAACAGGCAATACAGACAAGCAGGCT  
GGCATCTTAACTGCTACGATGATCAGTGGTGGTCTGATAGA

**Figure S13. (C)** The representative read sequences illustrate the insertion of both the plasmid backbone and LINE-1 fragment at Alb.



pD-sgDocut-LA190-E2A-BDDF8-Wpre-PolyA-RA130-sgDocut-Backbone (sgBB)

GGTGGTGCAGATGAACCTCAATGGGTCAGAGAGCCTGCTTTAGGAATCTAAGTAGAACTGTAATTAAGCAATGCAAGGCACGTACGTTTACTATGTCATTGCCATGGCT  
ATGAAGTGCAAATCTTAACAGTCTGCTAATACTTTTCTAACATCCATCATTCTTTGTTTCAGGGTCCAAACCTTGCTACTAGATGCAAAAGCGCCTTAGCCAGTGT  
ACTAATTATGCTCTCTTGAATTGGCTGGAGATGTTGAGAGCAACCCAGGTCCCATGCAATAGAGCTCTCCACTGCTTCTTTCTGTCCTTTTGGCATTCTGCTTTAG  
TGCCACCAGAAAGTACTACTGGGTGCAGTGGAACTGTCATGGGACTATGCAAAAGTGATCTCGGTGAGCTGCCTGTGGACCGCAAGATTCTCCCTAGAGTGCCAA  
AATCTTTTCACTCAACAACCTCAGTCGTTGATACAAAAGACTCTGTTTGAATACTCAGGATCACCTTTTCAACATCTAGCCAAAGCCACCTGGATGGGTCTGCT  
AGGTCTACCATCCAGGCTGAGGTTTATGATACAGTGGCTTACACTTAAGAACATGGCTTCCCCTCTGTCAGTCTTCTGCTGTTGGTGTATCTACTGAAAAGCT  
TCTGAGGGAGCTGAATGATGATCAGCAGACTCAAAAGGAGAAAGAGATGATTAAGTCTTCCCTGGTGGAAAGCCATACATGTCGGCAGTCTGAAAAGAGAA  
TGTTCCAATTGGCTCTGACCCTGTCCTTACTCATATCTTTGATGTCAGTGGCACTTAACATAGATCACCTTTTCAACATCTGAACTCAGGCTCATTGGAGCCTACTAGTATGTA  
GAAGGGAGTCTGGCCAAGGAAAAGACAGACCTTGCACAAATTTATACTACTTTTGTGTATTGATGAAGGGAAAAGTTGGCACTCAGAAAACAAAGAACTCCTTG  
ATGCAGGATAGGATGCTGATGCTCGGGCCTGGCCATAAATGCACACAGTCAATGGTATGTAACAGGCTCTGCCAGGCTGATTGGATGCCACAGGAAATC  
AGTCTATTGGCATGTGATGGAAAGGGCACCCTGACTGAAGTGCACCTCAATATTCCTGGAAGTTCACACATTTCTGTGAGGAACCACTGCCAGGCGCTCTGGAAAT  
CTGCCAAATAACTTCTTACTGCTCAAACTCTTGATGGACCTTGGACCTTACTACTTTTGTCTCATATCTCCCAACCAATGATGGCATTGGCGATGAAAATATGTCA  
AAGTAGACAGCTGCCAGAGAAACCCAACTACGAATGAAAATAATGAAGAAGCGGGAAGACTATGATGATCTTACTGATTCTGAAATGGATGTGGTCAGGTTT  
GATGATGACAACCTCTCTTTCTTCAAAATTCGCTCAGTGGCCAAGGATCCTAAAACCTGGGTACATTACATTGCTGCTGAAGAGGAGGACTGGGACTGATCT  
CCCTTAGTCTCCGCCAGTACAGAAGTTATAAAGTCAATATTGAACAATGGCCACTCCAGCGGATTGGTAGGAAGTCAAAAAGATCCGATTATGGCATACACA  
GATGAAACCTTTAAGACTCGTGAAGCTATTGAGCATTGAATCAGGAATCTTGGACCTTACTTTATGGGAAAGTGGAGACACTGTTGATTAATTAAGAATCAAG  
CAAGCAGACCATATAACATCCCTCAGCAGACTCACTGATGTCCTGCTTGTATTCAGGAGGATTCACAAAAGGTGAAAACCTTGAAGGATTTCGAAATTTCAATTTGCC  
AGGAGAAATTAACAAATATAAGTGGACAGTACTGTAGAAGTGGCCAACTAAATCAGATCCTCGGTGCCTGACCCTGATTACTAGTTCGATTTCTGAAATATGAGAG  
AGATCTAGCTTCCAGGACTCATTGGCCCTCTCCTCATCTGCTACAAAGAATCTGTAGATCAAAGAGGAAACCAGATAATGTCAGACAAGAGGATGTCATCTGTTTT  
TCATTTGATGAGAACCGAAGCTGGTACTCAGAGAAATATAACAAGCTTTTCCCAACTCCAGCTGGAGTGCAGTGTAGGATCCAGAGTCCAAGCTCCAACA  
TCATGCACAGCATCAATGGCTATGTTTTGATAGTTTGCAGTTGTCAGTTGATGAGGTGGCACTACTGGTCAATTCGAAAGTGGAGCAGACACTGACTTCTT  
TCTGCTTCTCTGGATACCTTCAACACAAAAATGGTCTATGAAGACACTCACCCTATTCCTTCTCAGGAGAACTGTCTCATGTCGATGAAAACCCAG  
GTCATGAGTCTGGGTGCCCAACTCAGACTTTCGGAACAGAGGATGACCCCTTACTGAAGGTTCTAGTTGGACAAGAACACTGGTATTACGAGGACA  
GTTATGAGATATTTCCAGTACTGCTGAGTAAAAACATGCCATTGAACCAAGAAGCTTCTCAAAACCACACTGTTGAACCCCACTCAACGGAAATACAGCT  
GCTACTCTTCACTCAGTCAAGAGGAAATGACTATGATACATCAATCAAGAGTAACTCAGCTTCAAGGAGGAAAGTATTGACTTATGATGAGGATGAAATCAGCC  
CCCGCAGCTTCAAAAAGAAAACAGCACTATTATTTGCTGCTGAGTGGAGAGGCTCTGGGATTAAGGATGAGTAGCTCCCCACATGTTCTAAGAAACAGGGCTCAG  
AGTGGCAGTGCCTCAGTTCAAGAAAGTTGTTCCAGGAATTTACTGATGGCTCCTTACTCAGCCCTTACCCTGGAGAATAAATGAACATTTGGGACTCCTGG  
GGCCATATAAGAGCAGAAGTTGAAAGATAATCATGGTAACTTTCAGAAATCAGCCCTCCTGCTCCCTATTCCTTACTAGCCTTATTTCTGATGAGGAAGTCA  
GAGGCAAGGAGCAGAACCTAGAAAACCTTTGTCAGGCTAATGAACCAAACTTACTTTTGAAGTGCACATCATATGGCACCCTAAAGATGAGTTTGACT  
GCAAAGCTGGGCTTATTTCTGATGTTGACCTGAAAAGATGTGCTACTAGCCGACTGATTGGACCCCTTCTGGTCTGCCACACTAACACACTGAACCTGCTCATG  
GGAGCAAGTGACAGTACAGAAATTTGCTGTTTTACCATCTTGTAGGAGCAGCAAGGCTGACTTCACTGAAATATGGAAGAAACTGCAAGCCCTCCTGCA  
ATATCCAGATGGAAGATCCACTTTAAAGAGAATATCGCTTCCATGCAATCAATGGCTACATATGGATACACTACCTGGCTTAGTATGGCTCAGGATCAAGGA  
TTGATGCTATCTGCTCAGTATGGGAGCAATGAAAACATCCATTTCTATTTCAAGTGGACATGTGTCTACTGACGAAAAAGAGGATATAAATGGCAGTGT  
ACAATGTCTATCCAGGTTTTGACAGACTGAAAATTTACCATCCAAAGCTGGAATTTGGCGGTTGAAATTTGGCGGTTGAAATTTGGCGGAGCATCTACATGCTGGATGAGA  
CACTTTTTCTGGTACAGCAATAAGTGTGACTCCTTGGGAATGGCTTCTGGACACATTAGAGATTTTCAAGATTACAGCTTCCAGGACAATATGGACAGTGGGCC  
CAAAGCTGGCCAGACTCATTATTCGGATCAATCAATGCCTGGAGCACCAGGAGGCTTTCCTGGATCAAGGTGGATGTTGGCACCCTATGATTTTACCGGACTT  
TCAAGACCAGGTTGCCCTCAGAAATTTCCAGCCTCACATCTCTCAATTTATCATCTGATAGTCTTGTAGTGGAAAGAGTGGCAGACTTACGAGGAAATTTCA  
CTGGAACCTTAATGGTCTTCTGGCAATGTGATTTCTGGGATAAAAACAATATTTAAACCTTCAATTTTGTCTGATACATCCGTTTGACCCAACCTCATTAT  
AGCATTTCGAGCACTCTCGCATGGAGTTGATGGGCTGTGATTAATAGTTGCAGCATTGCCATTGGGAATGGAGATTAAGCAATATCAGATGCACAGATTACTGCT  
TCATCTACTTTCAAAATATGTTGCCACCTGGTCTCCTTCAAAGCTCGACTCACCCTCAAAGGAGGAGTAAATGCCTGGAGACCTCAGGTGAATAATCCAAAGAG  
TGGCTGGCAAGTGAGACTCCAGAAAGCAATAAGAACTCAGAGGTAACACTCAGGGAGTAAATACTCTGCTTACCAGCATGTATGGAAAGGATTCCTCATCTCCAG  
CAGTCAAGATGGCCATCAGTGGACTCTTTTTGAGAATGCAAAAGTAAAGTGTTCAGGGAAATCAAGACTCCTCACACTGTGGTGAAGTCTCTAGACCCACC  
GTTACTGACTCGCTACCTTGAATTCACCCAGAGTGGGTCAGCCAGATGGCCCTGAGGATGGAGTTCGGGTGCGAGGCAAGCCACTTACTGAGTTTAAA  
CGCTCGACATAACCTCTGGATTACAAAATTTGAGAAAGTTCAGTATTCTTAACTATGTTGCTCTTTTCCGTTTCCGTTTCCGTTTCCGTTTCCGTTTCCG  
ATGCTATTGCTTCCGATGAGCTTCTATTTCTCTCTGATAAATCCTGGTGTGCTCTTTATGAGGAGTTGTGGCCCGTGTGACGCAACGTTGGCGTGTGGC  
ACTGTGTTTGTGACGCAACCCCTGTTGGGCTATGGCCACCCTGCTCAGCTCTTCCGGACTTTCGTTTCCGTTTCCGTTTCCGTTTCCGTTTCCGTTTCCG  
GCCGCTCCTGCTGCGCAGCTGCGGACGAGGCTGCGTGTGGCACTGACAAATCCGTTGTTGTGTCGCGGAAAGCTGACGCTTTTCAATCGTGTGTTG  
TGCCACCTGGATTCTGCGCGGAGCTCCTCTGCTACGCTCCTTCCGCTCAATCCAGCGGACTTCTTCCGCGGCTGCTGCGGCTCTGCGGCTCTTCCG  
GTCTGCTCTCCGCTCAGCAGAGTCCGTTCTCCTTGGCGGATCCAGACATGATTAAGATACATTTGAGTTTGGCAAAACCAACAGTAAAGATGCAAGTAAAA  
AATGCTTTATTGTAATTTGTAAGTCTGTTGTTATTTGTAACCTATAAGCTAGCAATAAAGTAAACAAAGTTAACAACAACACTGATCATTTTTTCAGTTGAG  
GGGAGGTTGGGAGGTTTTTAAAGCAAGTAAAACCTCTACAATGTGGTATGGCTGATTATGATCCGGCTGCCTGCGGCTTTCGTTGATGACGGTAAAAACCTCTG  
ACATATGACAGTCCCGGAGAGCTCAGCTGCTGTGAAGCGGATCCGGGAGACAGCAAGCCGCTCAGGCTCAAGCGGGTGTGGCGGTTGCGGCGGCTGCGGCGCAGC  
CATGAGGTTTAAACTAAACACATCAACACCACTTCTCAGTAACTACTTGGACTTAAAAAACAATAATCATATTCATTTTCTAAAACGATCAAGACTGATA  
ACCATTGACAAGAGCCATACAGCAAGCACCCTGAGGATTCTCAGCCACAGGTCGACTTTTTCGGGAAATTTCCGGGAACTTTCCGCAACCCCTATTGTTTTTCAA  
TACATTCAAATATGATCCGCTCATGAGACAATAACCTGTATAAATGCTTCAATAATATTGAAAAGGAAGAGTATGAGTATTAACATTTCCGTTGCGCCCTATTCC  
CTTTTTGCGGCTTTTGGCTTCTGTTTTGCTCACCAGAAACGCTGGTGAAGTAAAGATGCTGAAGATCAGTTGGGTGCACGAGTGGGTTACATCGAACTGGAT  
CTCAACAGCGTAAAGTCTTGTAGATTTTTTCCGCCGGAAGAAGCTTTTCCAATGATGAGCACTTTTAAAGTCTGCTATGTTGGCGGATTAATCCCTGATTGACGCGG  
GGCAAGAGCAACTCGGTCGCGCATACACTATTCTAGAATGACTTGGTGGTACTCACCAGTACAGAAAAGCATCTTACGGATGGCATGACAGTAAAGAAATTA  
TGCAGTGTCCATAAACCATGAGTGATAACACTCGGCAACTACTTCTGACAACGATCGGAGGACCGAAGGAGCTAACCCGTTTTTGCACAACATGGGGATCA  
TGTAACCTGCTTGTGCTGTTGGGAACCGGACTGAATGAAGCCATACCAACAGCAGGCTGACACCCAGTACGATGGCAATGGCAACACCTTGCACAACT  
TTAACTGGCAACTACTTACTAGCTTCCGGAACAATTAAGACTGGATGGAGGCGGATAAAGTTCAGGACCCTTCTGCGCTCGGCCCTCCGCTGCTGCTG  
TTAATGAGCAACTCCTTGGAGCTTTCTGAGACTTCTGAGCTTTTTTCTGCGCGATACTGCTGCTTGCACAAACAAAACCCAGCTACCAGCGGTTGTTGTTGGCGGATC  
AAGAGTACCAACTCTTTTCCGAAGTACTGGCTCAGCAGCGCATACCTAACTAGTCTTCTAGTGAAGCTTATGAGCCTTATGAGCCACTTAGCCACTCAAGAATCTG  
TAGCACCGCTACATCCTGCTCTGCTAATCCTGTTACAGTGGCTGCTGCCAGTGGGATAAAGTCTGTTACCGGTTGGACTCAAGACGATAGTTACCGGATA  
AGCGCAGCGGTCGGGCTGAAGCGGGGTTCTGTCACACAGCCGCTGGAGCGAAGCAGCTACACCAGAACTGAGATACCTACAGCGTGAAGTATGAGAAAGCG  
CCAGCTTCCCGAAGGGAAGAGCGGACAGTATCCGTAAGCGGCTGGCAAGCAGGAGGAGCGCACGAGGAGGCTCCAGGGGAAACGCTGGTATCTTT  
ATAGTCTGCTGGGTTTCCGCACTCTGACTGAGCTGATTTTGTGATGCTGTCAGGGCGGAGGCTTAAAGAAACCCGCAAGCTTATGAGTCTGCTGTTACGCT  
TCTGGCCTTTGCTGGCCTTTGCTCACATGTTCTTCTGCTGATTATCCCTGATTCTGTGGATAACCGTATTACCCTTGGAGTGAAGTATTAAGTCTGCGCGCAGC  
CGAAGCAGCGCAGCGAGTCACTGAGCGAGGAAAGCGGAAGAGCGCCAATACGCAAAACCCGCTTCCCGCGGCTTGGCCGATTCAATATGCTCAGCTGGGAC  
GACAGGTTTTCCGACTGGAAGCGGGCAGTGAGCCCAAGCAGCAATATGTAGTTACTACTTATGGCACCCAGGCTTTACTCTTATGCTCCGCTGCTGATG  
TTGTGGAATGTGAGCGGATAACAATTTACACAGGA

Figure S14. The sequence of pD-BDDF8-sg vectors with HA190-130. The backbone used for the plasmids in our study is derived from pBR322, a well-known bacterial cloning vector.



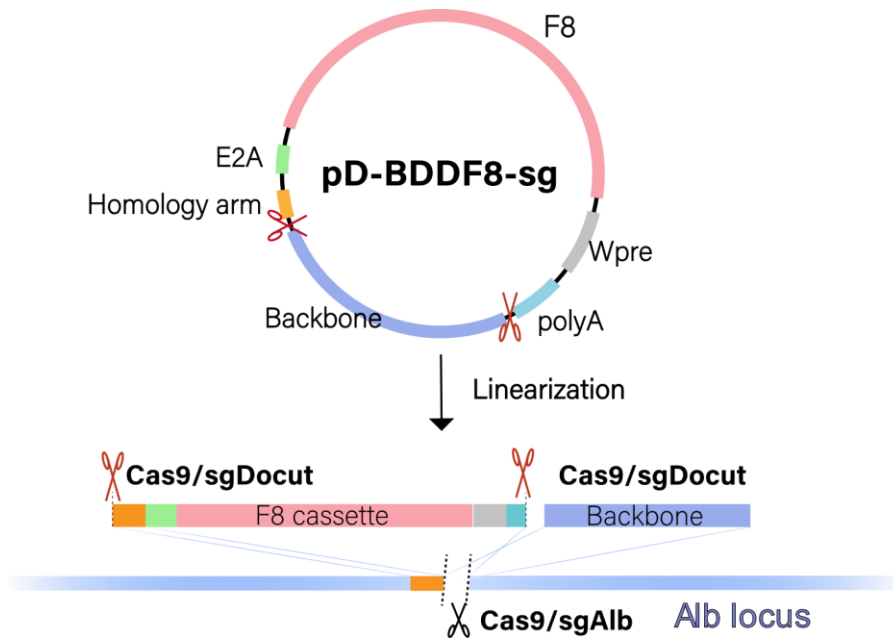

**Figure S15. Linearization and Integration of Double-Cut Donor Plasmid:** This schematic illustrates the process where a double-cut donor plasmid is linearized into two distinct fragments within hepatocytes. Subsequently, these fragments integrate at the genomic site cleaved by sgAlb. The diagram provides a visual representation of the linearization and integration steps, highlighting the two resulting fragments and their integration at the targeted genomic location.

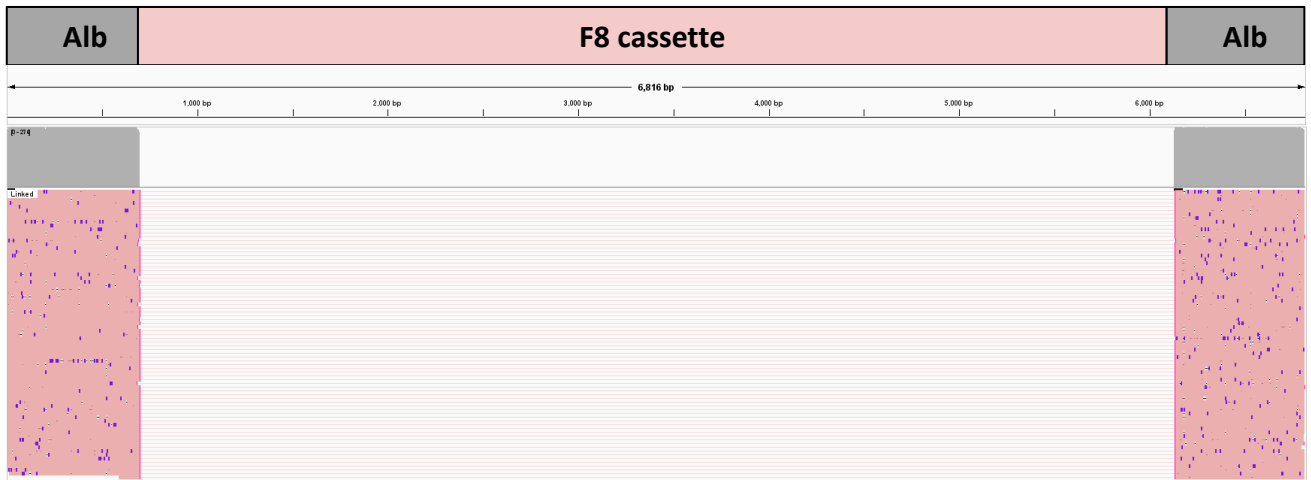

**Figure S16. Analysis of Circular Donor Plasmid Integration:** This figure analyzes the integration of a circular donor plasmid with HA600-600 homology arms, which lacks the sgDocut, into the target genomic site. The reference sequence used for alignment is based on the expected outcome of homology-directed repair (HDR) editing. This panel shows random 200 reads out of over 6000 aligned with the reference sequence. Nanopore sequencing of over 6,000 reads failed to reveal any F8 insertions. This lack of detection likely resulted from the preferential amplification of shorter background sequences (1.3 kb) without insertions, overshadowing potential longer insertions.

| Target site | sgRNA Sequence        |
|-------------|-----------------------|
| sgAlb-E14   | GTTGTGATGTGTTTAGGCTA  |
| sgDocut     | GGTGGTGCAGATGAACTCCA  |
| sgBB        | AATAAACCCAGCCAGCCGGAA |

**Table S1. The target sequences of sgRNAs utilized in this study.**

| Primer           | Sequence                       | Length |
|------------------|--------------------------------|--------|
| Alb-PE150-F-BC1  | aacaaggtATTGCCTATGGCTATGAAGTGC | 242 bp |
| Alb-PE150-F-BC2  | aacattccATTGCCTATGGCTATGAAGTGC |        |
| Alb-PE150-F-BC3  | aaccgtaaATTGCCTATGGCTATGAAGTGC |        |
| Alb-PE150-F-BC4  | aacgagaaATTGCCTATGGCTATGAAGTGC |        |
| Alb-PE150-F-BC5  | aacttggaATTGCCTATGGCTATGAAGTGC |        |
| Alb-PE150-F-BC6  | aagaccaaATTGCCTATGGCTATGAAGTGC |        |
| Alb-PE150-F-BC7  | aaggtcatATTGCCTATGGCTATGAAGTGC |        |
| Alb-PE150-F-BC8  | aatagtggATTGCCTATGGCTATGAAGTGC |        |
| Alb-PE150-F-BC9  | aatgccttATTGCCTATGGCTATGAAGTGC |        |
| Alb-PE150-F-BC10 | acaatagcATTGCCTATGGCTATGAAGTGC |        |
| Alb-PE150-F-BC11 | acaggattATTGCCTATGGCTATGAAGTGC |        |
| Alb-PE150-F-BC12 | accgacctATTGCCTATGGCTATGAAGTGC |        |
| Alb-PE150-F-BC13 | acgagtccATTGCCTATGGCTATGAAGTGC |        |
| Alb-PE150-F-BC14 | acgcataaATTGCCTATGGCTATGAAGTGC |        |
| Alb-PE150-F-BC15 | acggacgaATTGCCTATGGCTATGAAGTGC |        |
| Alb-PE150-F-BC16 | acgtatggATTGCCTATGGCTATGAAGTGC |        |
| Alb-PE150-F-BC17 | actaaccaATTGCCTATGGCTATGAAGTGC |        |
| Alb-PE150-F-BC18 | actcaggtATTGCCTATGGCTATGAAGTGC |        |
| Alb-PE150-F-BC19 | acttggtgATTGCCTATGGCTATGAAGTGC |        |
| Alb-PE150-F-BC20 | agaagtacATTGCCTATGGCTATGAAGTGC |        |
| Alb-PE150-F-BC21 | agccactcATTGCCTATGGCTATGAAGTGC |        |
| Alb-PE150-F-BC22 | agctctaaATTGCCTATGGCTATGAAGTGC |        |
| Alb-PE150-F-BC23 | aggtgtctATTGCCTATGGCTATGAAGTGC |        |
| Alb-PE150-F-BC24 | agtccgttATTGCCTATGGCTATGAAGTGC |        |
| Alb-PE150-R      | TGCTTGCTGTATGGCTCTTGT          |        |

**Table S2. The primers employed to determine the cleavage efficiencies of Cas9-sgRNA that targets Alb.**

| Primer           | Sequence                           | Length  |
|------------------|------------------------------------|---------|
| Alb-4.9kb-F-BC1  | gccggttgaaTGAGACCTTCACCTTCCACTCTG  | 4886 bp |
| Alb-4.9kb-F-BC2  | ggtatagatggTGAGACCTTCACCTTCCACTCTG |         |
| Alb-4.9kb-F-BC3  | gtacttgtagTGAGACCTTCACCTTCCACTCTG  |         |
| Alb-4.9kb-F-BC4  | taagctcaagTGAGACCTTCACCTTCCACTCTG  |         |
| Alb-4.9kb-F-BC5  | tcgctccatcTGAGACCTTCACCTTCCACTCTG  |         |
| Alb-4.9kb-F-BC6  | ttagaatcacgTGAGACCTTCACCTTCCACTCTG |         |
| Alb-4.9kb-F-BC7  | ttcaggtgtcTGAGACCTTCACCTTCCACTCTG  |         |
| Alb-4.9kb-F-BC8  | ttctgcaccgcTGAGACCTTCACCTTCCACTCTG |         |
| Alb-4.9kb-F-BC9  | caatcttacagTGAGACCTTCACCTTCCACTCTG |         |
| Alb-4.9kb-F-BC10 | ccaggagggtgTGAGACCTTCACCTTCCACTCTG |         |
| Alb-4.9kb-F-BC11 | cgagactattcTGAGACCTTCACCTTCCACTCTG |         |
| Alb-4.9kb-F-BC12 | gacctgacatcTGAGACCTTCACCTTCCACTCTG |         |
| Alb-4.9kb-F-BC13 | aacaacaacacTGAGACCTTCACCTTCCACTCTG |         |
| Alb-4.9kb-F-BC14 | aacattgagccTGAGACCTTCACCTTCCACTCTG |         |
| Alb-4.9kb-F-BC15 | aagaccataggTGAGACCTTCACCTTCCACTCTG |         |
| Alb-4.9kb-F-BC16 | aatagtgtcggTGAGACCTTCACCTTCCACTCTG |         |
| Alb-4.9kb-F-BC17 | acaatgcgaatTGAGACCTTCACCTTCCACTCTG |         |
| Alb-4.9kb-F-BC18 | accgctatgccTGAGACCTTCACCTTCCACTCTG |         |
| Alb-4.9kb-F-BC19 | acgtaggataaTGAGACCTTCACCTTCCACTCTG |         |
| Alb-4.9kb-F-BC20 | actattactccTGAGACCTTCACCTTCCACTCTG |         |
| Alb-4.9kb-F-BC21 | agctcggacctTGAGACCTTCACCTTCCACTCTG |         |
| Alb-4.9kb-F-BC22 | agtctagcgttTGAGACCTTCACCTTCCACTCTG |         |
| Alb-4.9kb-F-BC23 | atggaggacggTGAGACCTTCACCTTCCACTCTG |         |
| Alb-4.9kb-F-BC24 | attggtgcataTGAGACCTTCACCTTCCACTCTG |         |
| Alb-4.9kb-R      | TGGCTCGTTATTAGCCCAGTTGATAGC        |         |

**Table S3. The primers utilized to detect large deletions in Figure 1C.**

| Primer          | Sequence                        | Length  |
|-----------------|---------------------------------|---------|
| Alb-4.7kb-F-BC1 | aacaccttcttTGTGGGCAAAAACCACAGTA | 4727 bp |
| Alb-4.7kb-F-BC2 | aaccgtccaccTGTGGGCAAAAACCACAGTA |         |
| Alb-4.7kb-F-BC3 | aagcggttataTGTGGGCAAAAACCACAGTA |         |
| Alb-4.7kb-F-BC4 | aattccgcgctTGTGGGCAAAAACCACAGTA |         |
| Alb-4.7kb-F-BC5 | acctcctgtaaTGTGGGCAAAAACCACAGTA |         |
| Alb-4.7kb-F-BC6 | acggaaccagcTGTGGGCAAAAACCACAGTA |         |
| Alb-4.7kb-F-BC7 | agaagaagagaTGTGGGCAAAAACCACAGTA |         |
| Alb-4.7kb-F-BC8 | aggtgagtcttTGTGGGCAAAAACCACAGTA |         |
| Alb-4.7kb-R     | ACCTGGCTCGTTATTAGCCCAGTTGATAG   |         |

**Table S4. The primers utilized for long-range PCR amplification in Figure 2A.**

| Primer                  | Sequence                          | Length  |
|-------------------------|-----------------------------------|---------|
| Alb-HA600-1.5kb-F1      | GGAGCAACTGAAGACTGTCATGGA          | 1586 bp |
| Alb-HA600-1.5kb-R1      | AGTGTCAAAGTCAGGGGTCTCACC          |         |
| Alb-HA600-1.4kb-F2-BC1  | aaacactttctcCGGAGCAACTGAAGACTGTCA | 1380 bp |
| Alb-HA600-1.4kb-F2-BC2  | ttaacgaaaccgCGGAGCAACTGAAGACTGTCA |         |
| Alb-HA600-1.4kb-F2-BC3  | aaactctgagaaCGGAGCAACTGAAGACTGTCA |         |
| Alb-HA600-1.4kb-F2-BC4  | tgtatcaaagacCGGAGCAACTGAAGACTGTCA |         |
| Alb-HA600-1.4kb-F2-BC5  | aacgtctccataCGGAGCAACTGAAGACTGTCA |         |
| Alb-HA600-1.4kb-F2-BC6  | tcgattaactgaCGGAGCAACTGAAGACTGTCA |         |
| Alb-HA600-1.4kb-F2-BC7  | acaaagtaaccCGGAGCAACTGAAGACTGTCA  |         |
| Alb-HA600-1.4kb-F2-BC8  | tagcgaacaaccCGGAGCAACTGAAGACTGTCA |         |
| Alb-HA600-1.4kb-F2-BC9  | acagcagtttgCGGAGCAACTGAAGACTGTCA  |         |
| Alb-HA600-1.4kb-F2-BC10 | gtagagacatgtCGGAGCAACTGAAGACTGTCA |         |
| Alb-HA600-1.4kb-F2-BC11 | accatagctaagCGGAGCAACTGAAGACTGTCA |         |
| Alb-HA600-1.4kb-F2-BC12 | gcactaacctttCGGAGCAACTGAAGACTGTCA |         |
| Alb-HA600-1.4kb-F2-BC13 | atgcacgaacagCGGAGCAACTGAAGACTGTCA |         |
| Alb-HA600-1.4kb-F2-BC14 | gatatgatgttgCGGAGCAACTGAAGACTGTCA |         |
| Alb-HA600-1.4kb-F2-BC15 | caaacactccaCGGAGCAACTGAAGACTGTCA  |         |
| Alb-HA600-1.4kb-F2-BC16 | cgttccaatacCGGAGCAACTGAAGACTGTCA  |         |
| Alb-HA600-1.4kb-R2      | AGCCTTCATTATTGCCCTATT             |         |

**Table S5. The primers employed for nested PCR amplification of long genomic flanking regions in Supplementary Figure S2.**

| Primer                 | Sequence                        | Length |
|------------------------|---------------------------------|--------|
| Alb-HA85-0.5kb-F1      | Acaacagatgtcagagagcctgc         | 499 bp |
| Alb-HA85-0.5kb-R1      | Cagggctaactcctttgctctgg         |        |
| Alb-HA85-332bp-F2-BC1  | acgccacgttAGCAATGCAAGGCACGTACG  | 332 bp |
| Alb-HA85-332bp-F2-BC2  | cgactagaccAGCAATGCAAGGCACGTACG  |        |
| Alb-HA85-332bp-F2-BC3  | cagtgaccagAGCAATGCAAGGCACGTACG  |        |
| Alb-HA85-332bp-F2-BC4  | ccaggctcttAGCAATGCAAGGCACGTACG  |        |
| Alb-HA85-332bp-F2-BC5  | tcgcgacactAGCAATGCAAGGCACGTACG  |        |
| Alb-HA85-332bp-F2-BC6  | agccgtcacaAGCAATGCAAGGCACGTACG  |        |
| Alb-HA85-332bp-F2-BC7  | gtgcatatccAGCAATGCAAGGCACGTACG  |        |
| Alb-HA85-332bp-F2-BC8  | accgagccatAGCAATGCAAGGCACGTACG  |        |
| Alb-HA85-332bp-F2-BC9  | cactctcaggAGCAATGCAAGGCACGTACG  |        |
| Alb-HA85-332bp-F2-BC10 | gtagtcaatgAGCAATGCAAGGCACGTACG  |        |
| Alb-HA85-332bp-F2-BC11 | ccgtgtggttaAGCAATGCAAGGCACGTACG |        |
| Alb-HA85-332bp-F2-BC12 | gaatcgagacAGCAATGCAAGGCACGTACG  |        |
| Alb-HA85-332bp-F2-BC13 | gacgcggtaaAGCAATGCAAGGCACGTACG  |        |
| Alb-HA85-332bp-F2-BC14 | gaacaccacaAGCAATGCAAGGCACGTACG  |        |
| Alb-HA85-332bp-F2-BC15 | caactcctgaAGCAATGCAAGGCACGTACG  |        |
| Alb-HA85-332bp-F2-BC16 | cgattacctcAGCAATGCAAGGCACGTACG  |        |
| Alb-HA85-332bp-F2-BC17 | gaccactatcAGCAATGCAAGGCACGTACG  |        |
| Alb-HA85-332bp-F2-BC18 | gagacacggtAGCAATGCAAGGCACGTACG  |        |
| Alb-HA85-332bp-F2-BC19 | gatatgcttAGCAATGCAAGGCACGTACG   |        |
| Alb-HA85-332bp-F2-BC20 | gcaacagaggAGCAATGCAAGGCACGTACG  |        |
| Alb-HA85-332bp-F2-BC21 | gccagacaagAGCAATGCAAGGCACGTACG  |        |
| Alb-HA85-332bp-F2-BC22 | gctaggatctAGCAATGCAAGGCACGTACG  |        |
| Alb-HA85-332bp-F2-BC23 | ggagttaccgAGCAATGCAAGGCACGTACG  |        |
| Alb-HA85-332bp-F2-BC24 | ggtacgtgcaAGCAATGCAAGGCACGTACG  |        |
| Alb-HA85-332bp-F2-BC25 | gtactgacaaAGCAATGCAAGGCACGTACG  |        |
| Alb-HA85-332bp-F2-BC26 | taacatgaggAGCAATGCAAGGCACGTACG  |        |
| Alb-HA85-332bp-F2-BC27 | tacaacggatAGCAATGCAAGGCACGTACG  |        |
| Alb-HA85-332bp-R2      | TATCTACAAATGGAACCCAACTGATGACC   |        |

**Table S6. The primers utilized for nested PCR amplification of short genomic flanking regions in Figure 3.**



| Primer                 | Sequence              | Length |
|------------------------|-----------------------|--------|
| qPCR-BDDF8-FL-F        | CACGTACGTTTACTATGTCA  | 261bp  |
| qPCR-BDDF8-FL-R        | AGTATCTTCTGGTGGCACTA  |        |
| qPCR-BDDF8-FR-F        | CTGTAAGCGGATGCCGGGAG  | 249bp  |
| qPCR-BDDF8-FR-R        | GCTGGTGCTTGTCTGTATGG  |        |
| qPCR-BDDF8-RL-F        | GCACGTACGTTTACTATGTC  | 283bp  |
| qPCR-BDDF8-RL-R        | AAACCTCTGACACATGCAGC  |        |
| qPCR-BDDF8-RR-F        | CCCAGGTAGTATCTTCTGGT  | 281bp  |
| qPCR-BDDF8-RR-R        | CCAGCTGGTGCTTGTCTGTA  |        |
| qPCR-BB-FL-F           | CCTATGGCTATGAAGTGCAA  | 248bp  |
| qPCR-BB-FL-R           | GTTGAATACTCATACTCTTC  |        |
| qPCR-BB-FR-F           | AAGCGGGCAGTGAGCGCAAC  | 248bp  |
| qPCR-BB-FR-R           | GGCTCTTGTCAAATGGTTAT  |        |
| qPCR-BB-RL-F           | CACGTACGTTTACTATGTCA  | 277bp  |
| qPCR-BB-RL-R           | ACGACAGGTTTCCCGACTGG  |        |
| qPCR-BB-RR-F           | CGCACATTTCCCGAAAAGT   | 285bp  |
| qPCR-BB-RR-R           | TCTCCCTGGTTTGGTCTCCT  |        |
| qPCR-F8fBBr-junction-F | GCTTGTCTGTAAGCGGATGC  | 203bp  |
| qPCR-F8fBBr-junction-R | CACTCATTAGGCACCCCAGG  |        |
| qPCR-F8rBBf-junction-F | GCACAGAAAGAAGCAGGTGGA | 227bp  |
| qPCR-F8rBBf-junction-R | CATTTCCCGAAAAGTGCCA   |        |

**Table S7. The primers employed for qPCR to correlate with the proportion of different insertion outcomes analyzed based on Nanopore sequencing data in Figure 5.**

| Primer                        | Sequence                          | Length |
|-------------------------------|-----------------------------------|--------|
| <b>Forward left junction</b>  |                                   |        |
| Alb-S516-FL-F-BC1             | aacattgagccCGTCATGGGTGTGACTTTTG   |        |
| Alb-S516-FL-F-BC2             | aagttcattccCGTCATGGGTGTGACTTTTG   |        |
| Alb-S516-FL-F-BC3             | accacagattaCGTCATGGGTGTGACTTTTG   |        |
| Alb-S516-FL-F-BC4             | aacaccgattagCGTCATGGGTGTGACTTTTG  |        |
| Alb-S516-FL-F-BC5             | aaccactctaagCGTCATGGGTGTGACTTTTG  |        |
| Alb-S516-FL-F-BC6             | aaccgtatccgtCGTCATGGGTGTGACTTTTG  |        |
| Alb-S516-FL-F-BC7             | aaccttggatggCGTCATGGGTGTGACTTTTG  |        |
| Alb-S516-FL-F-BC8             | aacttctctccCGTCATGGGTGTGACTTTTG   |        |
| Alb-S516-FL-F-BC9             | aagaaggttacgCGTCATGGGTGTGACTTTTG  |        |
| Alb-S516-FL-F-BC10            | aagagtggaagtCGTCATGGGTGTGACTTTTG  |        |
| Alb-S516-FL-F-BC11            | aaggatactctcCGTCATGGGTGTGACTTTTG  |        |
| Alb-S516-FL-F-BC12            | aagtcacacgccCGTCATGGGTGTGACTTTTG  |        |
| Alb-S516-FL-HA85-190-R        | AAACTCATCAATGTATCTTATCATGTCTG     | 5.3kb  |
| Alb-S516-FL-HA600-R           | CCCAGGCTTTGCAGTCAAAC              | 4.9kb  |
| <b>Forward right junction</b> |                                   |        |
| Alb-S516-FR-F-BC1             | acgtaggataaCCTTGAAATCTCGCCAATA    |        |
| Alb-S516-FR-F-BC2             | attaacatgccCCTTGAAATCTCGCCAATA    |        |
| Alb-S516-FR-F-BC3             | catacagaccgcCCTTGAAATCTCGCCAATA   |        |
| Alb-S516-FR-F-BC4             | aatagcaatcggCCTTGAAATCTCGCCAATA   |        |
| Alb-S516-FR-F-BC5             | aattacgagaggCCTTGAAATCTCGCCAATA   |        |
| Alb-S516-FR-F-BC6             | acaaccttcagcCCTTGAAATCTCGCCAATA   |        |
| Alb-S516-FR-F-BC7             | acaatgacaaggCCTTGAAATCTCGCCAATA   |        |
| Alb-S516-FR-F-BC8             | acagtaataggCCTTGAAATCTCGCCAATA    |        |
| Alb-S516-FR-F-BC9             | accacaatgatgCCTTGAAATCTCGCCAATA   |        |
| Alb-S516-FR-F-BC10            | accgaacgccatCCTTGAAATCTCGCCAATA   |        |
| Alb-S516-FR-F-BC11            | acctctcgaaCCTTGAAATCTCGCCAATA     |        |
| Alb-S516-FR-F-BC12            | acgccatacataCCTTGAAATCTCGCCAATA   |        |
| Alb-S516-FR-HA85-190-R        | actcgtcatgtgtatataagttgtg         |        |
| Alb-S516-FR-HA600-F-BC1       | aagaggaggttggactgcaaagcctggg      |        |
| Alb-S516-FR-HA600-F-BC2       | ctggaaatgttggactgcaaagcctggg      |        |
| Alb-S516-FR-HA600-F-BC3       | cttgttgggttggactgcaaagcctggg      |        |
| Alb-S516-FR-HA600-F-BC4       | tatgcgttgggttggactgcaaagcctggg    |        |
| Alb-S516-FR-HA600-R           | GTGGGCAGATGACACACTGA              | 4.1kb  |
| <b>Reverse left junction</b>  |                                   |        |
| Alb-S516-RL-F-BC1             | ccagagcacacCGTCATGGGTGTGACTTTTG   |        |
| Alb-S516-RL-F-BC2             | cgagactattcCGTCATGGGTGTGACTTTTG   |        |
| Alb-S516-RL-F-BC3             | cttgacgttaaCGTCATGGGTGTGACTTTTG   |        |
| Alb-S516-RL-F-BC4             | acggttctaatacCGTCATGGGTGTGACTTTTG |        |
| Alb-S516-RL-F-BC5             | actcagccggtacCGTCATGGGTGTGACTTTTG |        |
| Alb-S516-RL-F-BC6             | actgaggtgagcCGTCATGGGTGTGACTTTTG  |        |
| Alb-S516-RL-F-BC7             | agagcataaggaCGTCATGGGTGTGACTTTTG  |        |
| Alb-S516-RL-F-BC8             | aggaagagagagCGTCATGGGTGTGACTTTTG  |        |
| Alb-S516-RL-F-BC9             | agtaagcgtccCGTCATGGGTGTGACTTTTG   |        |
| Alb-S516-RL-F-BC10            | agtatctggtgaCGTCATGGGTGTGACTTTTG  |        |
| Alb-S516-RL-F-BC11            | agtcttctatcCGTCATGGGTGTGACTTTTG   |        |
| Alb-S516-RL-F-BC12            | ataagactcaccCGTCATGGGTGTGACTTTTG  |        |
| Alb-S516-RL-R                 | ACACAGACCTTGCACAAATTTATACTACT     | 6.1kb  |
| <b>Reverse right junction</b> |                                   |        |
| Alb-S516-RR-F-BC1             | gagtcgtggtAATCACAGCCCATCAACTCC    |        |
| Alb-S516-RR-F-BC2             | ggacaccgtaaAATCACAGCCCATCAACTCC   |        |
| Alb-S516-RR-F-BC3             | gtcgtcatgtcAATCACAGCCCATCAACTCC   |        |
| Alb-S516-RR-F-BC4             | atctcaaggtaAATCACAGCCCATCAACTCC   |        |
| Alb-S516-RR-F-BC5             | atggagattggtAATCACAGCCCATCAACTCC  |        |
| Alb-S516-RR-F-BC6             | attgagtcttccAATCACAGCCCATCAACTCC  |        |
| Alb-S516-RR-F-BC7             | caacgtagtaagAATCACAGCCCATCAACTCC  |        |
| Alb-S516-RR-F-BC8             | cacattcattggaAATCACAGCCCATCAACTCC |        |
| Alb-S516-RR-F-BC9             | cacttccgagctAATCACAGCCCATCAACTCC  |        |
| Alb-S516-RR-F-BC10            | cagagcaaccatAATCACAGCCCATCAACTCC  |        |
| Alb-S516-RR-F-BC11            | caggttgatccgAATCACAGCCCATCAACTCC  |        |
| Alb-S516-RR-F-BC12            | catcaagaacggAATCACAGCCCATCAACTCC  |        |
| Alb-S516-RR-R                 | ATTGAGAATTCTCGTAATGTTGAAGTATT     |        |

**Table S8. The primers utilized to distinguish NHEJ and HDR in Figure 6.**

| <b>Primer</b>      | <b>Sequence</b>          | <b>Length</b> |
|--------------------|--------------------------|---------------|
| Alb-HA600-1.8kb-F1 | CCTTAAACTGTGGCCTCACATTCC | 1832 bp       |
| Alb-HA600-1.8kb-R1 | TACTTGGTGGGCAGATGACACACT |               |
| Alb-HA600-1.4kb-F2 | GGAGCAACTGAAGACTGTCATGG  | 1384bp        |
| Alb-HA600-1.4kb-R2 | AAGCCTCCATTATTGCCCTATTTT |               |

**Table S9. The primers utilized to detect the insertion of donor plasmid at a circular stage (with no sgDocut) .**
